# Supplementary material for: Synthesis, in vitro and in silico study of novel 1,3-diphenylurea derived Schiff bases as competitive α-glucosidase inhibitors
Source: Royal Society of Chemistry journal article supplement (doi:10.1039/d4ra05767h), 2024-01-01

### $^1\text{H}$ NMR and $^{13}\text{C}$ NMR Spectra of 5a

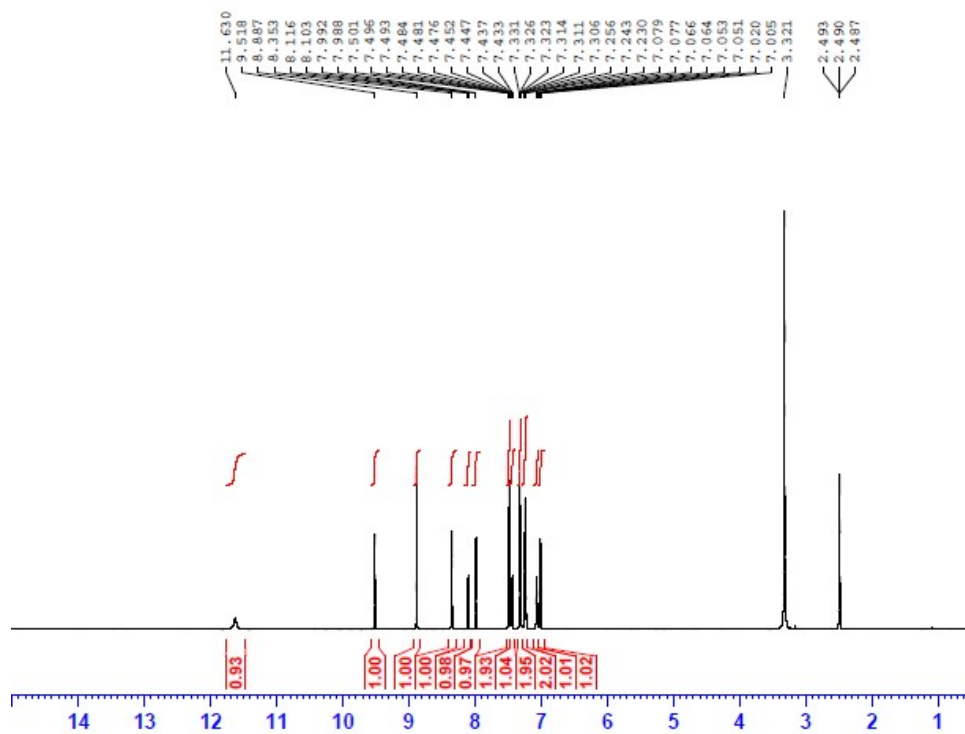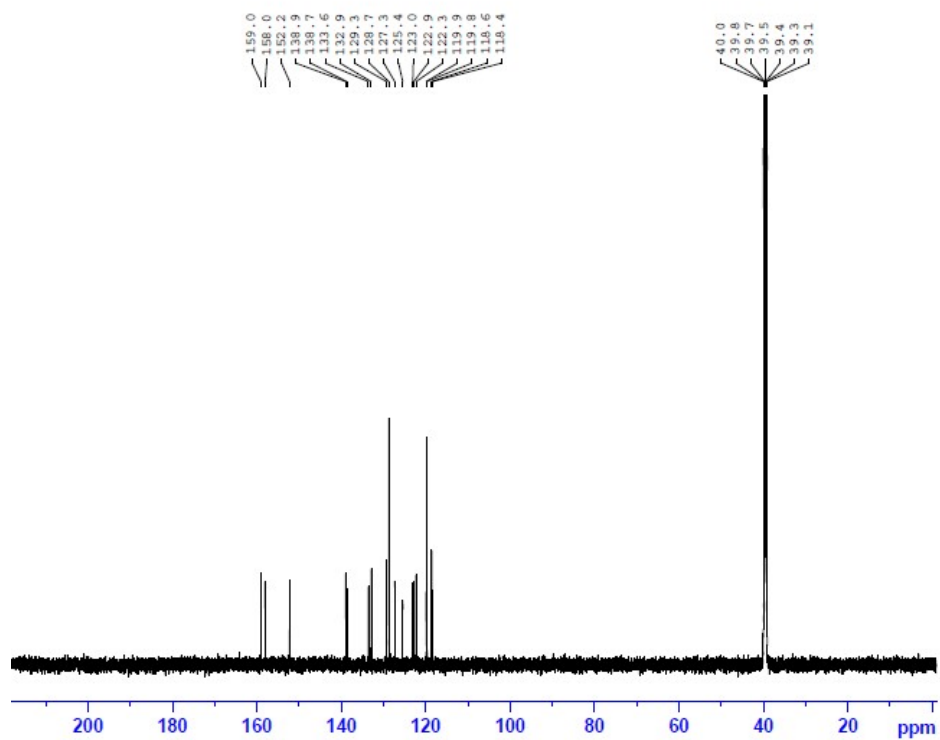

# $^1\text{H}$ NMR and $^{13}\text{C}$ NMR Spectra of 5b

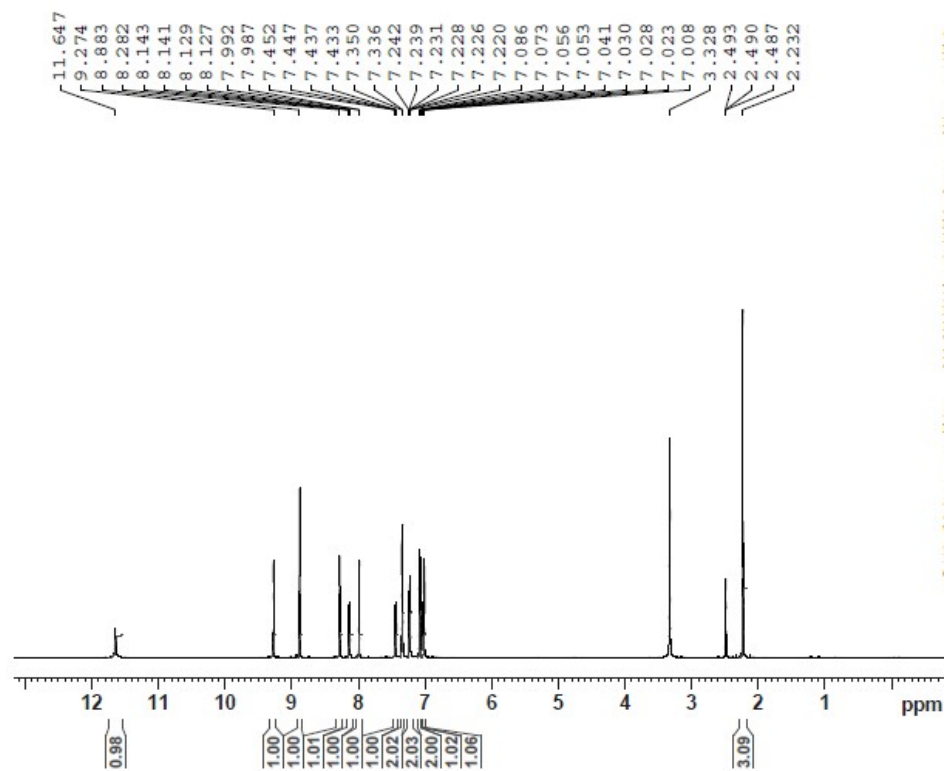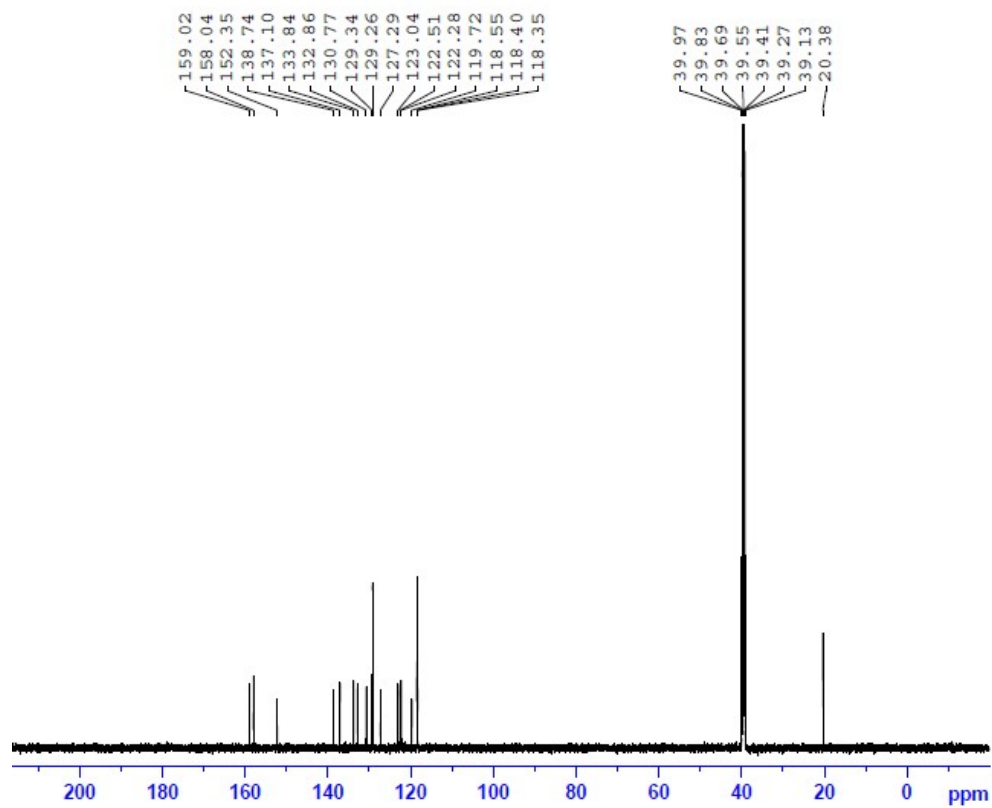

# <sup>1</sup>H NMR and <sup>13</sup>C NMR Spectra of 5c

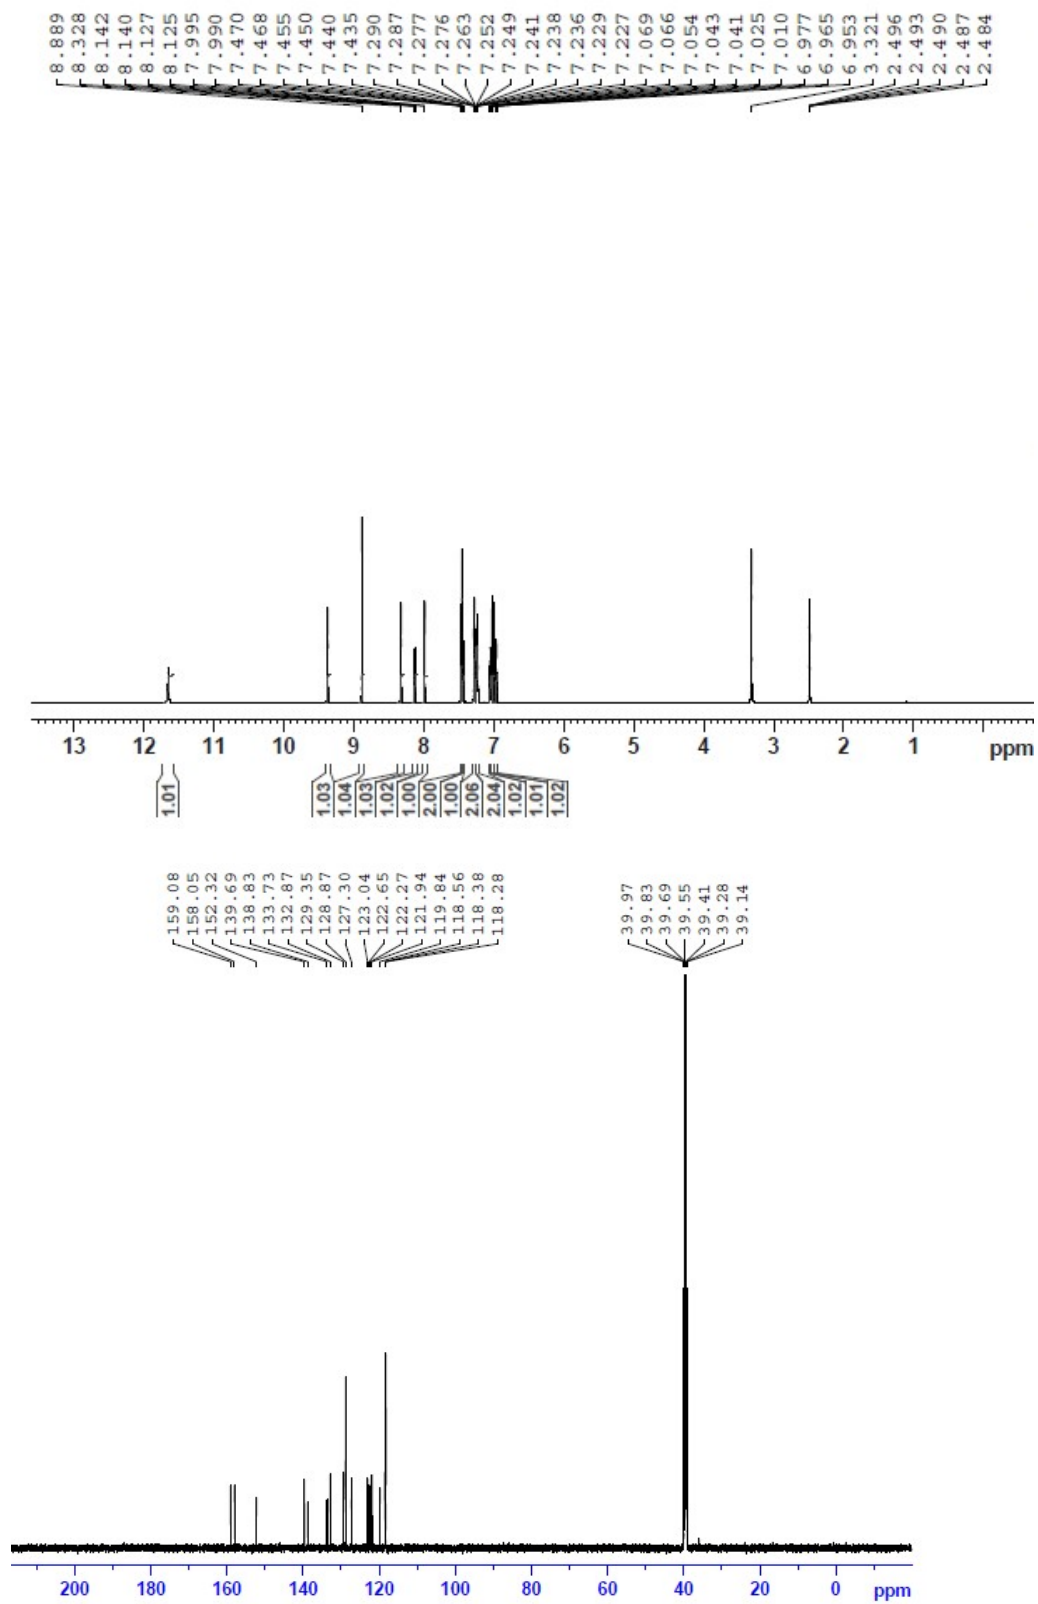

# <sup>1</sup>HNMR and <sup>13</sup>CNMR Spectra of 5d

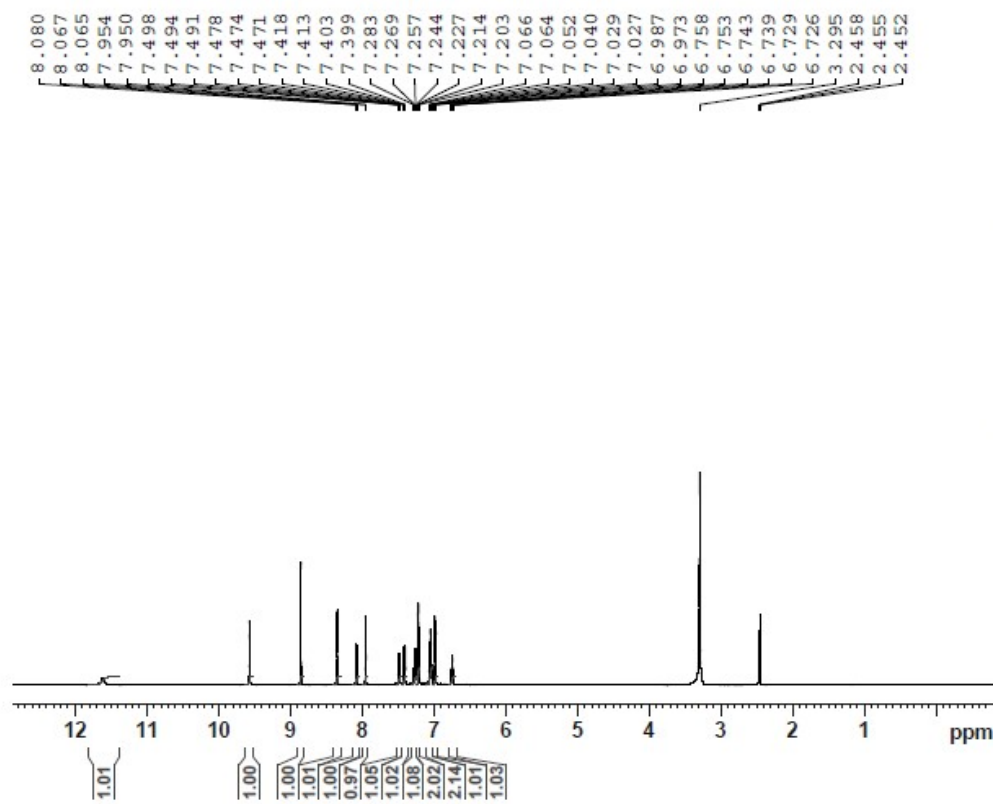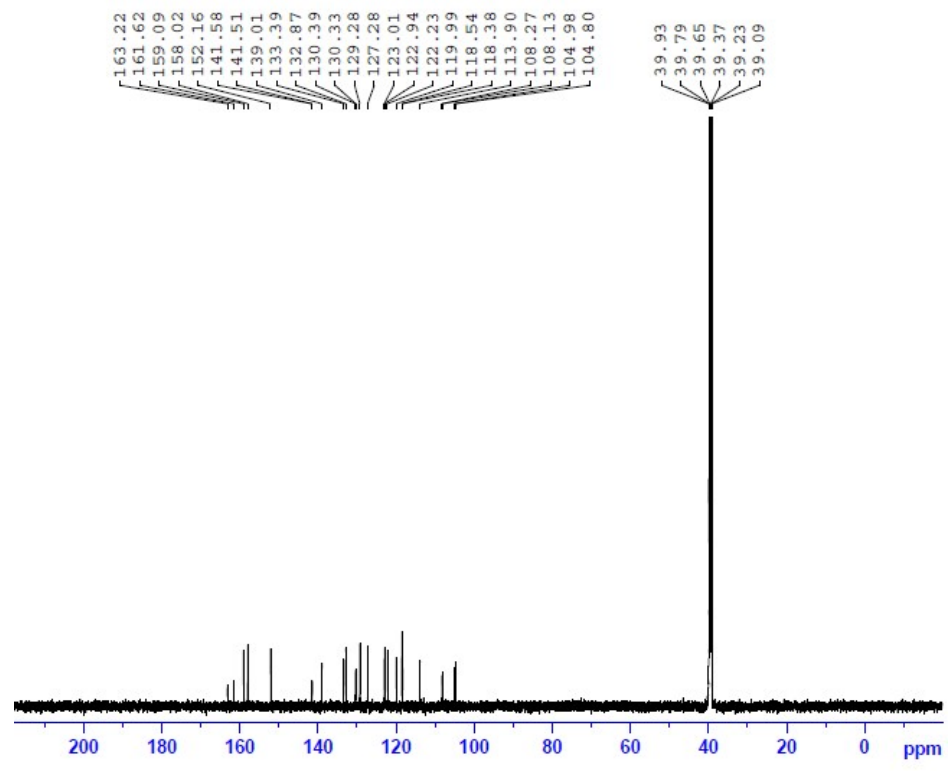

# <sup>1</sup>H NMR and <sup>13</sup>C NMR Spectra of 5e

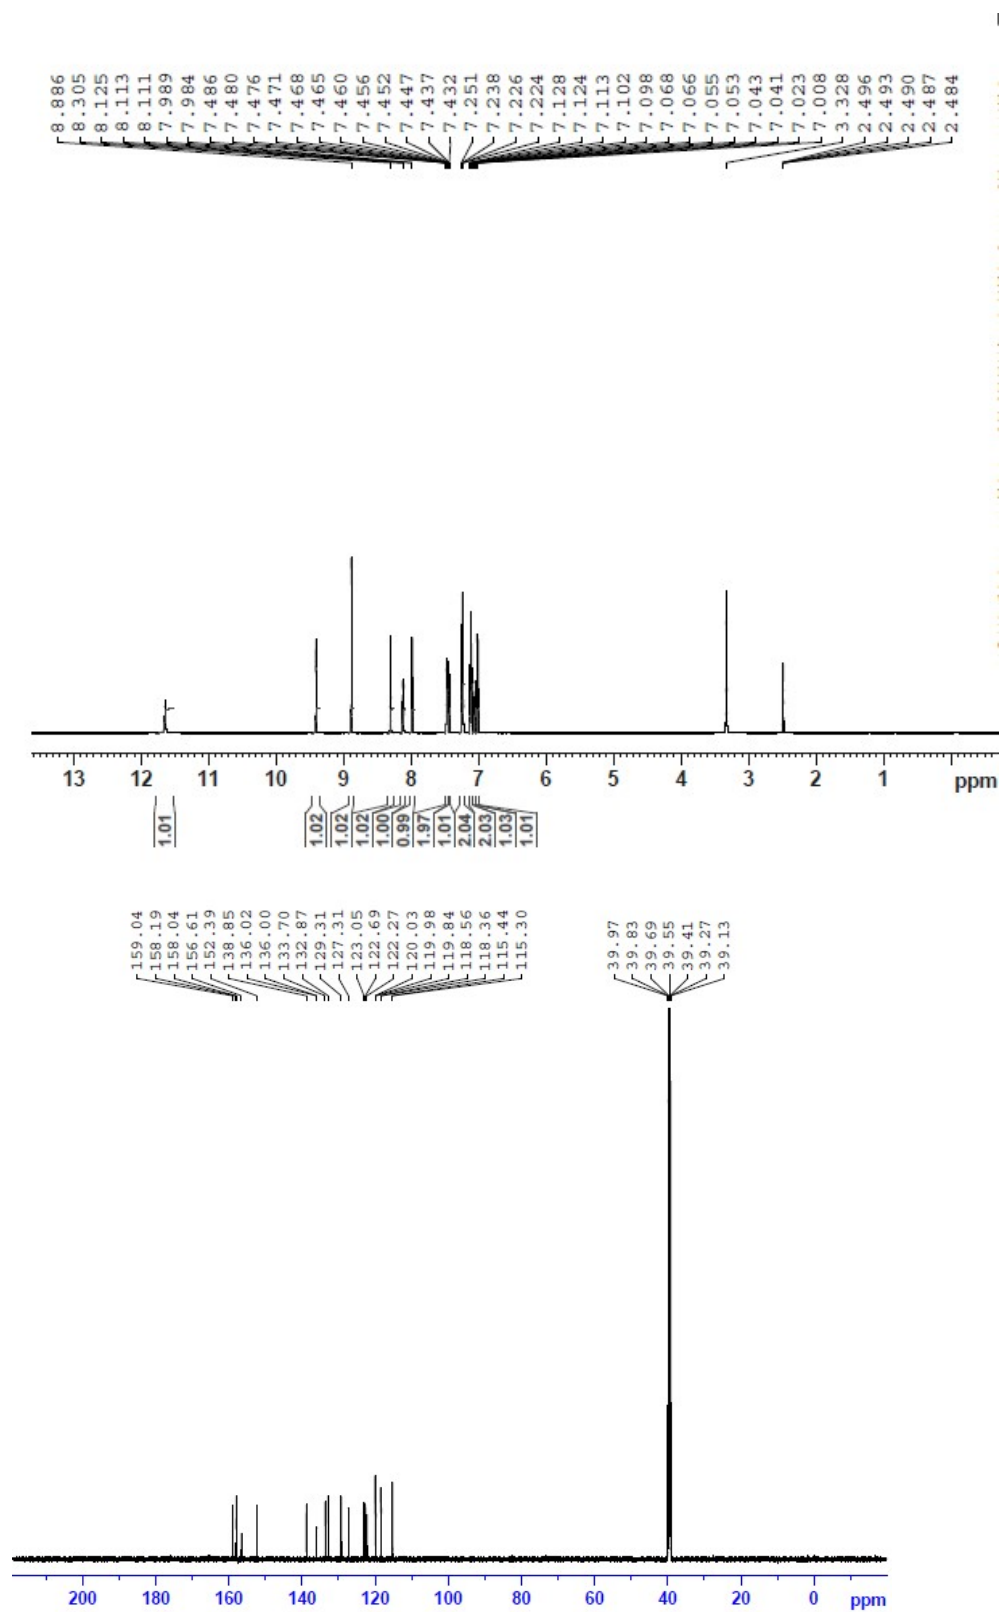

# <sup>1</sup>H NMR and <sup>13</sup>C NMR Spectra of 5f

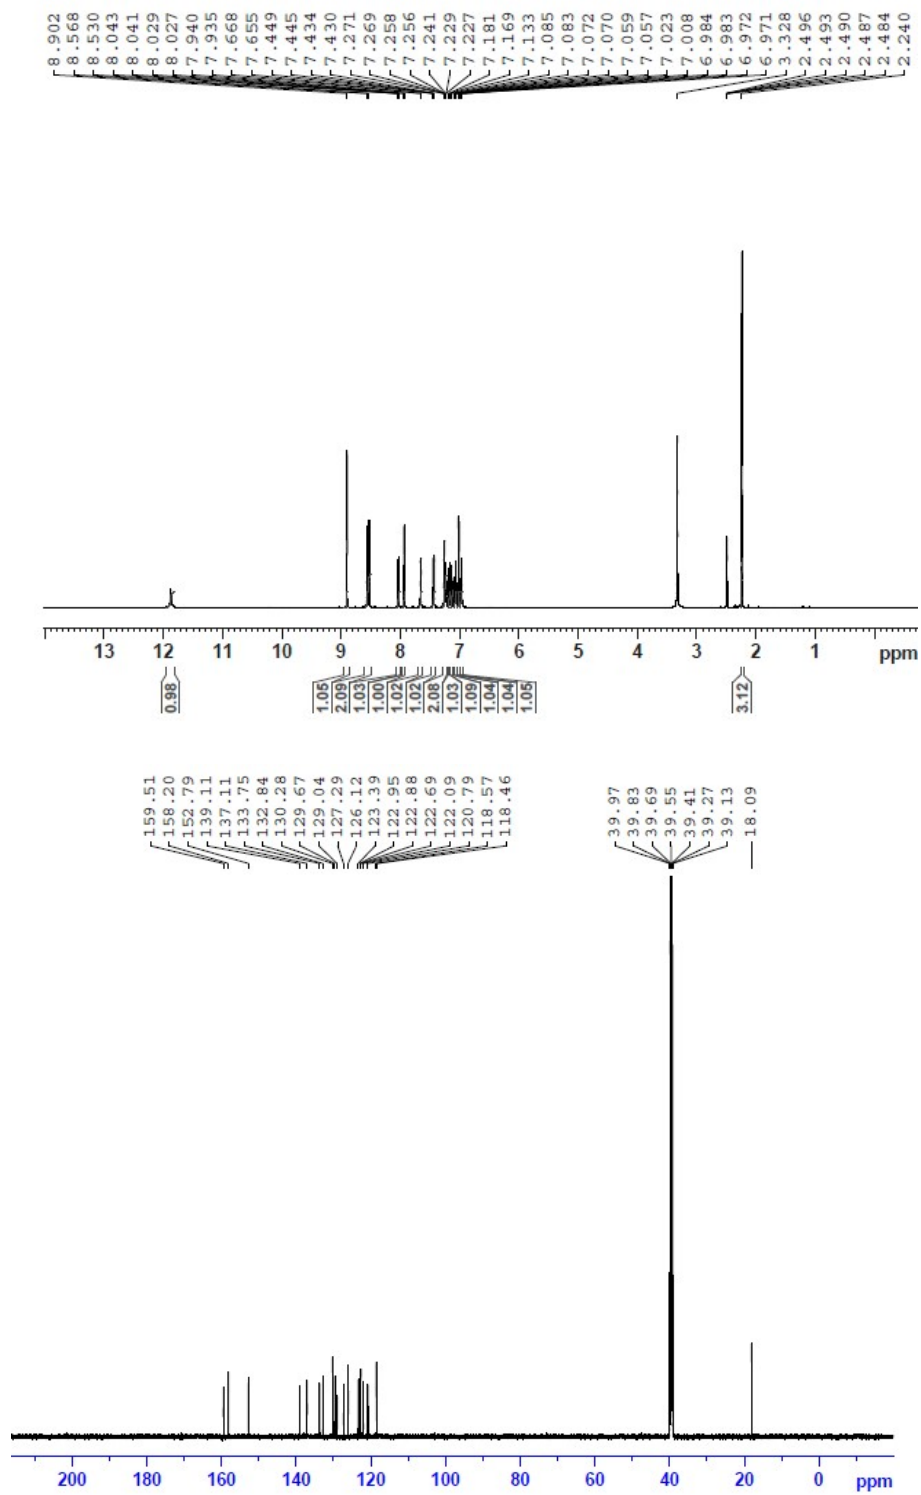

# $^1\text{H}$ NMR and $^{13}\text{C}$ NMR Spectra of 5g

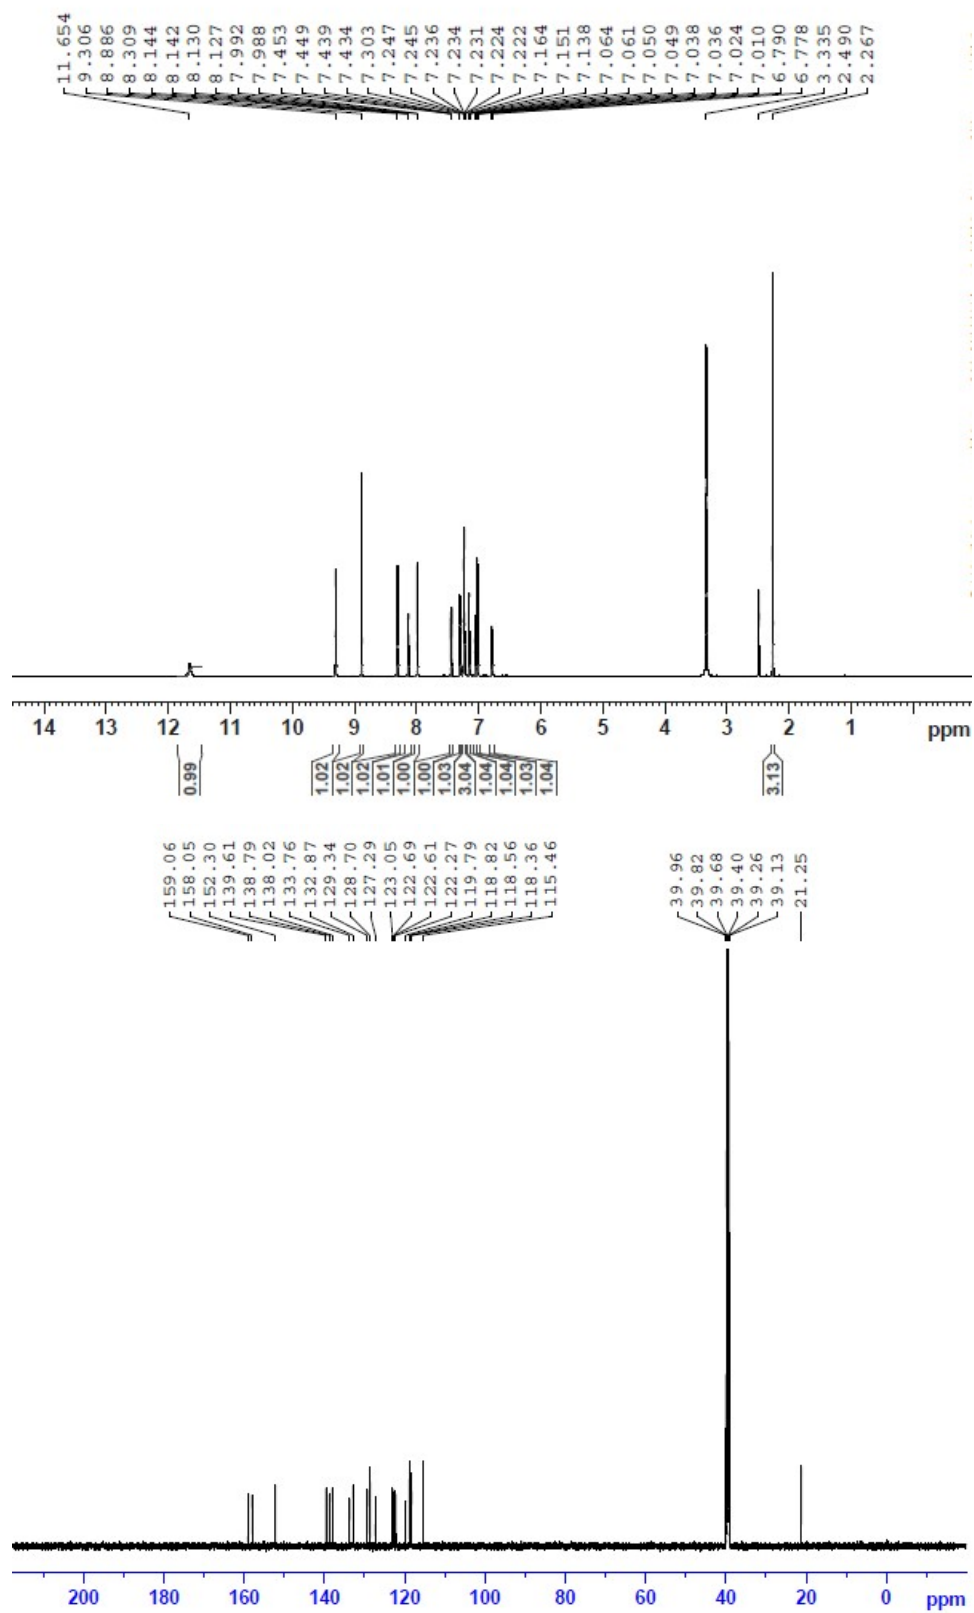

# <sup>1</sup>H NMR and <sup>13</sup>C NMR Spectra of 5h

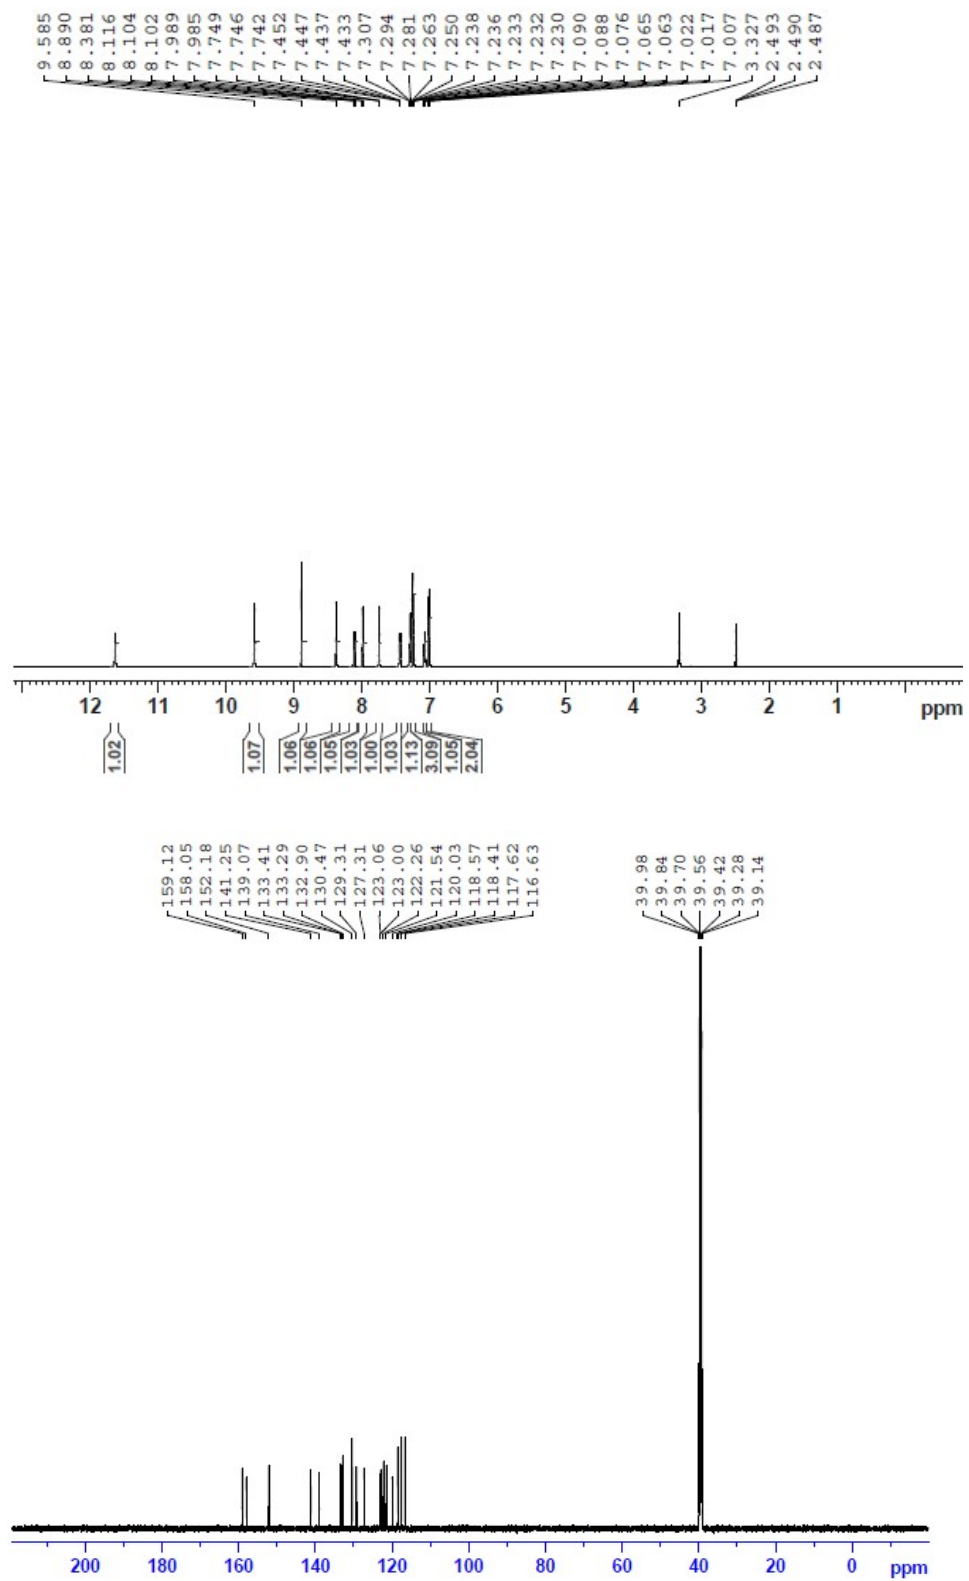



# <sup>1</sup>HNMR and <sup>13</sup>CNMR Spectra of 5i

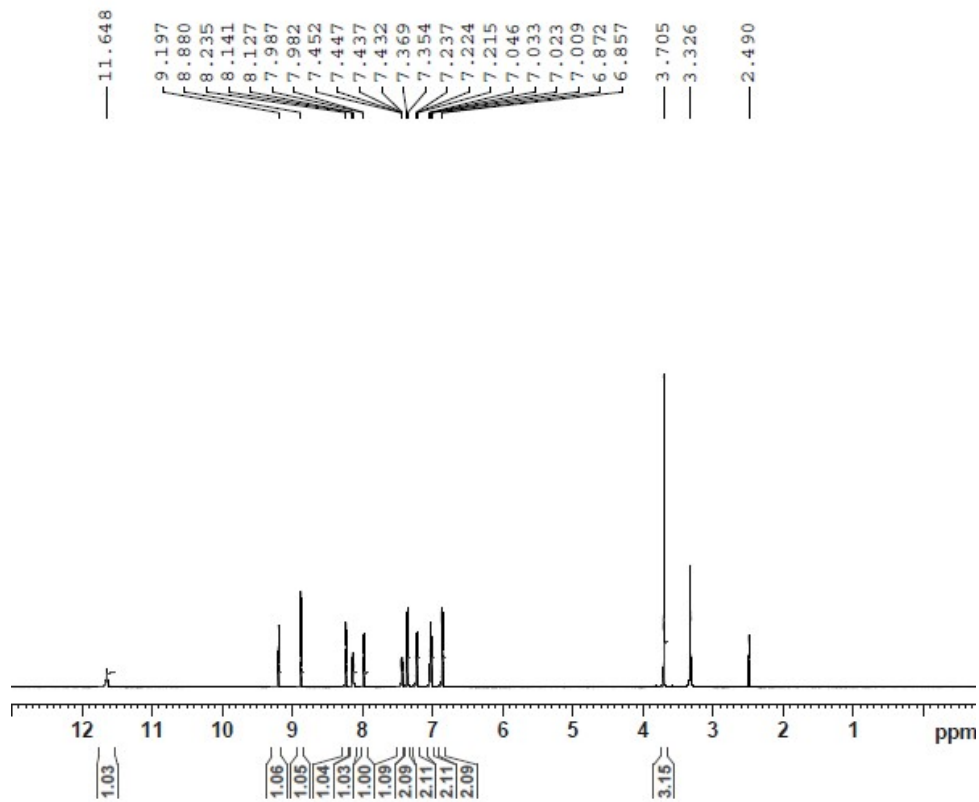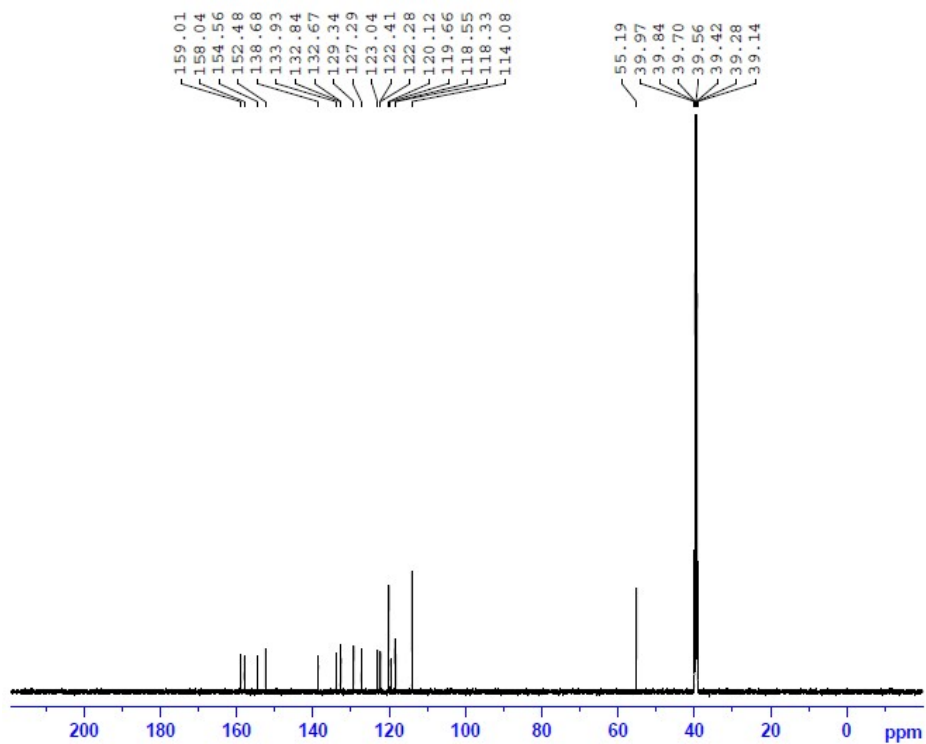

# <sup>1</sup>H NMR and <sup>13</sup>C NMR Spectra of 5j

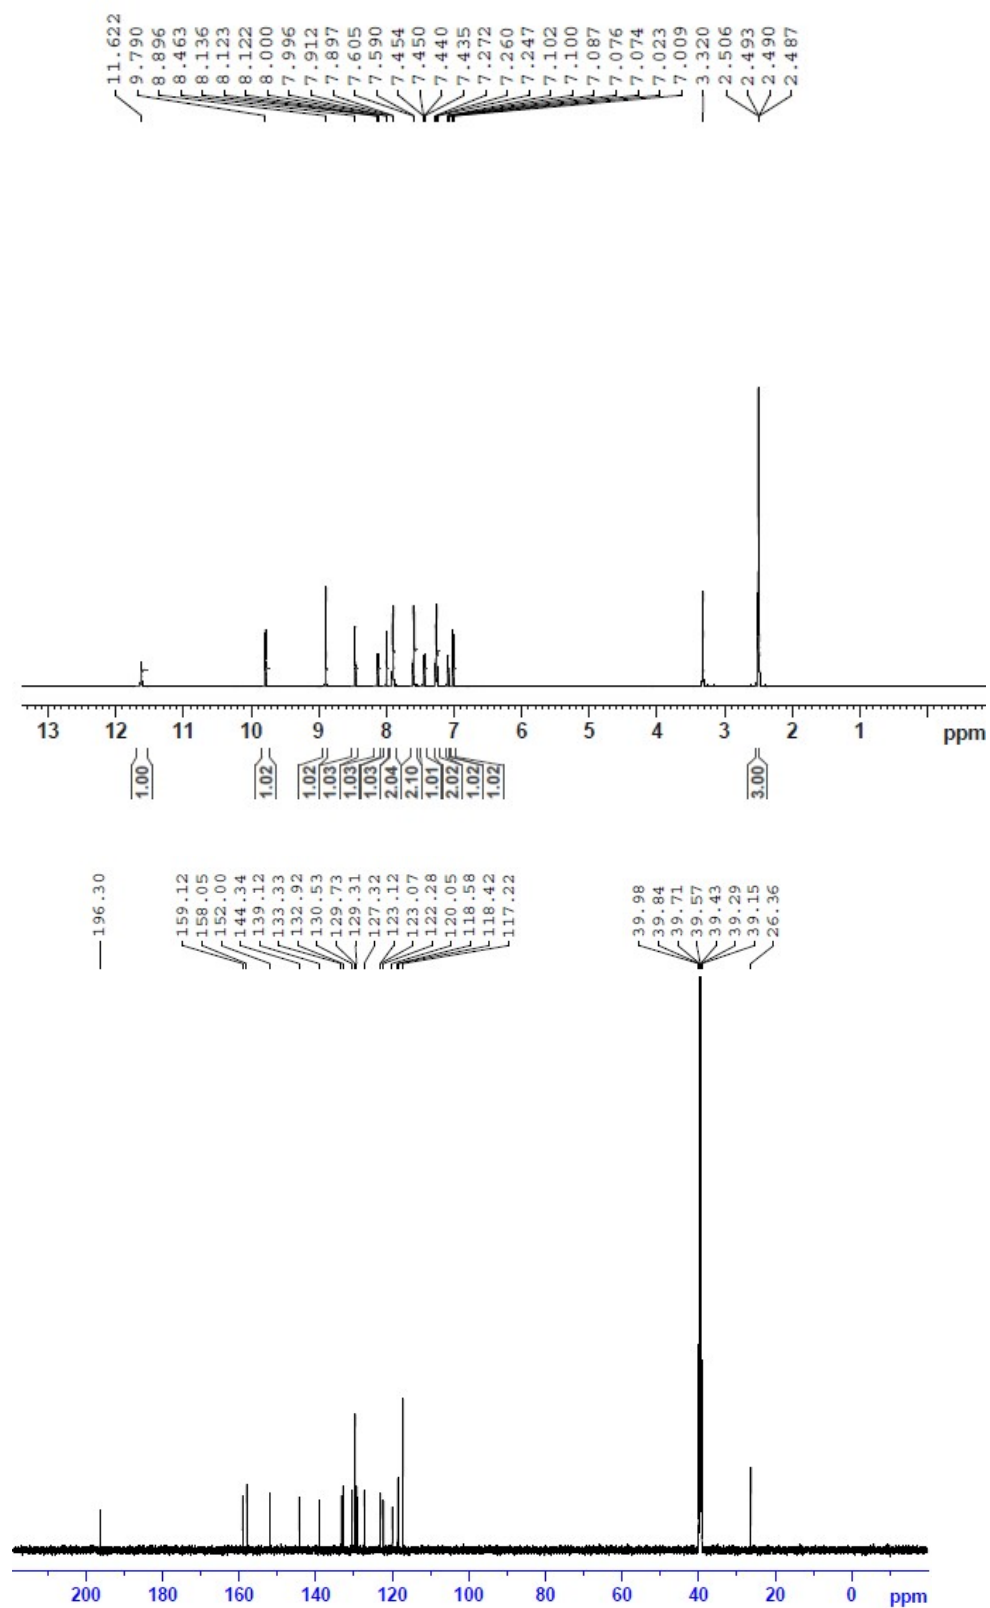

# <sup>1</sup>H NMR and <sup>13</sup>C NMR Spectra of 5k

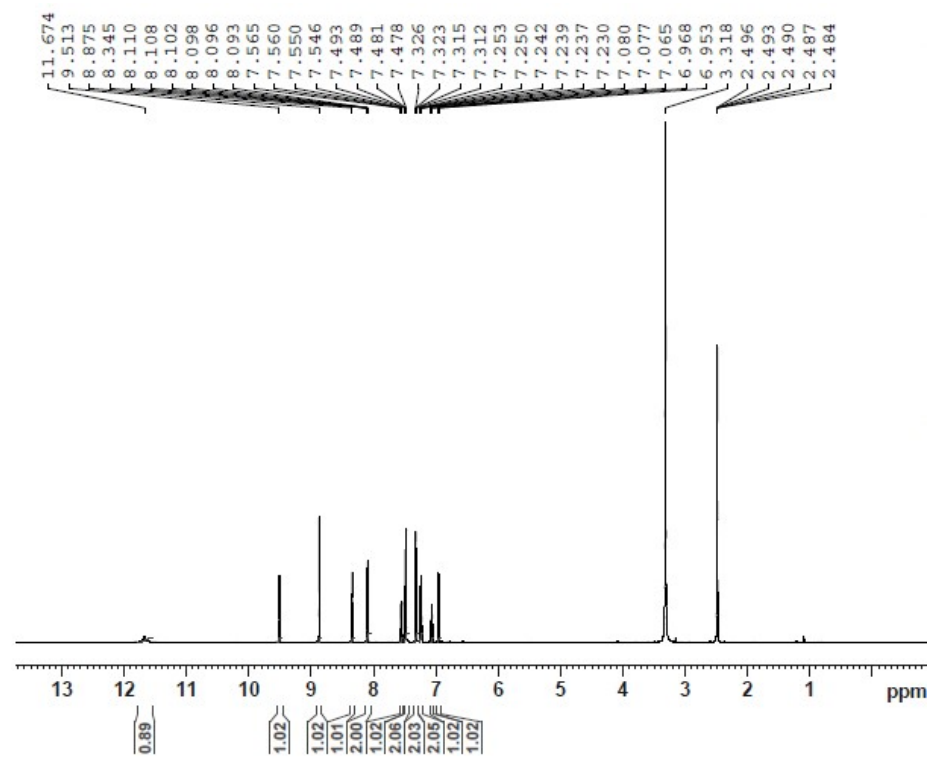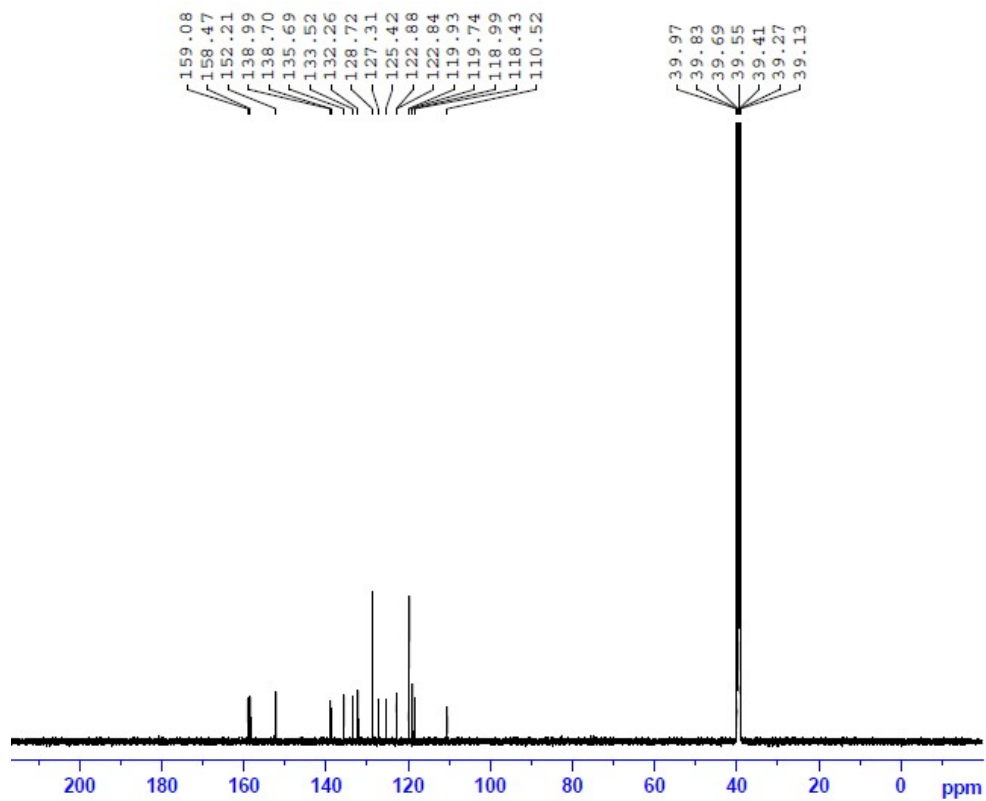

# <sup>1</sup>H NMR and <sup>13</sup>C NMR Spectra of 5l

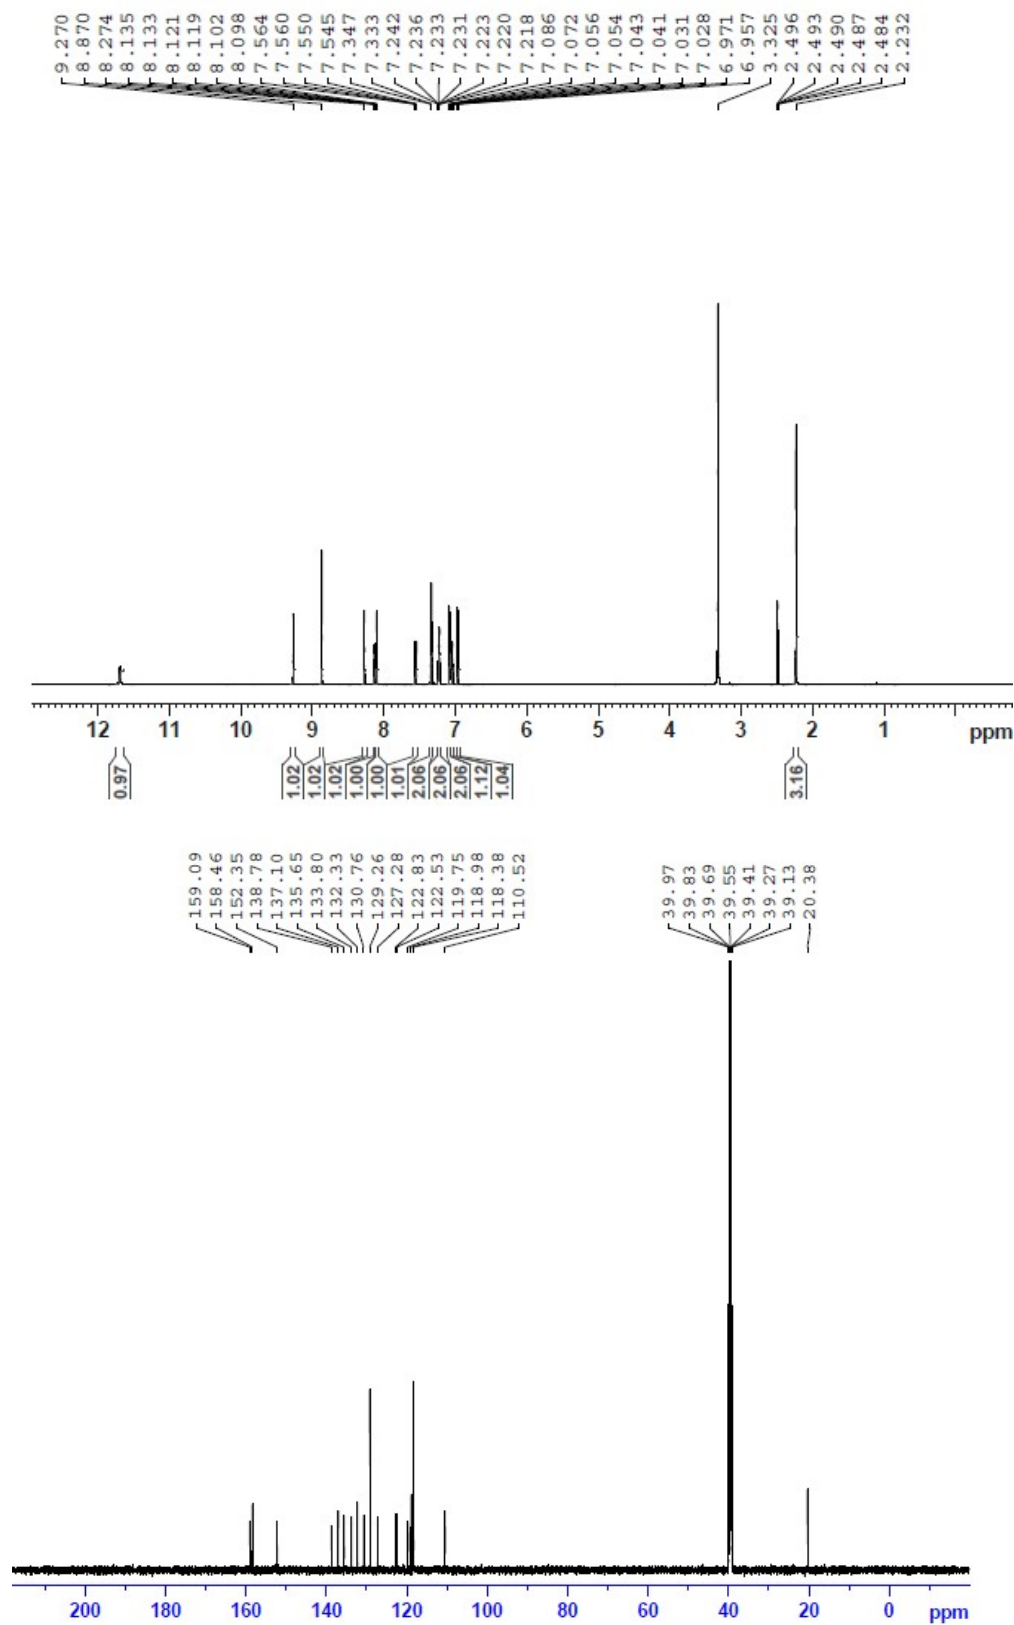

# <sup>1</sup>H NMR and <sup>13</sup>C NMR Spectra of 5m

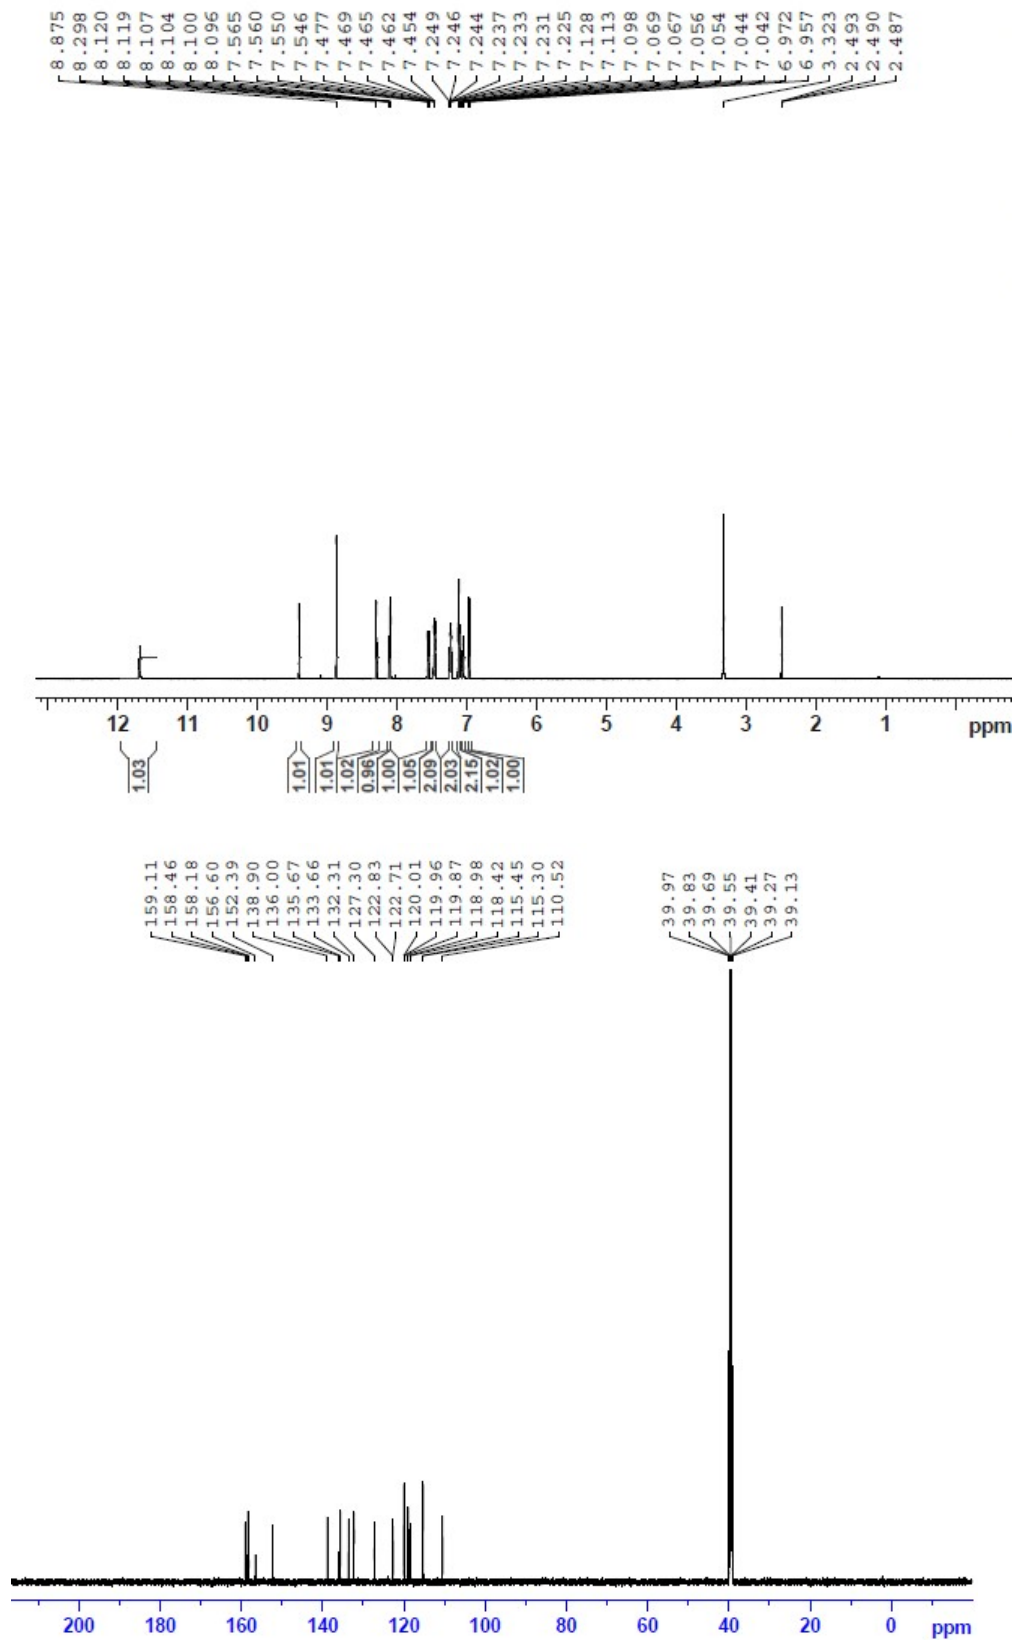

# <sup>1</sup>HNMR and <sup>13</sup>CNMR Spectra of 5n

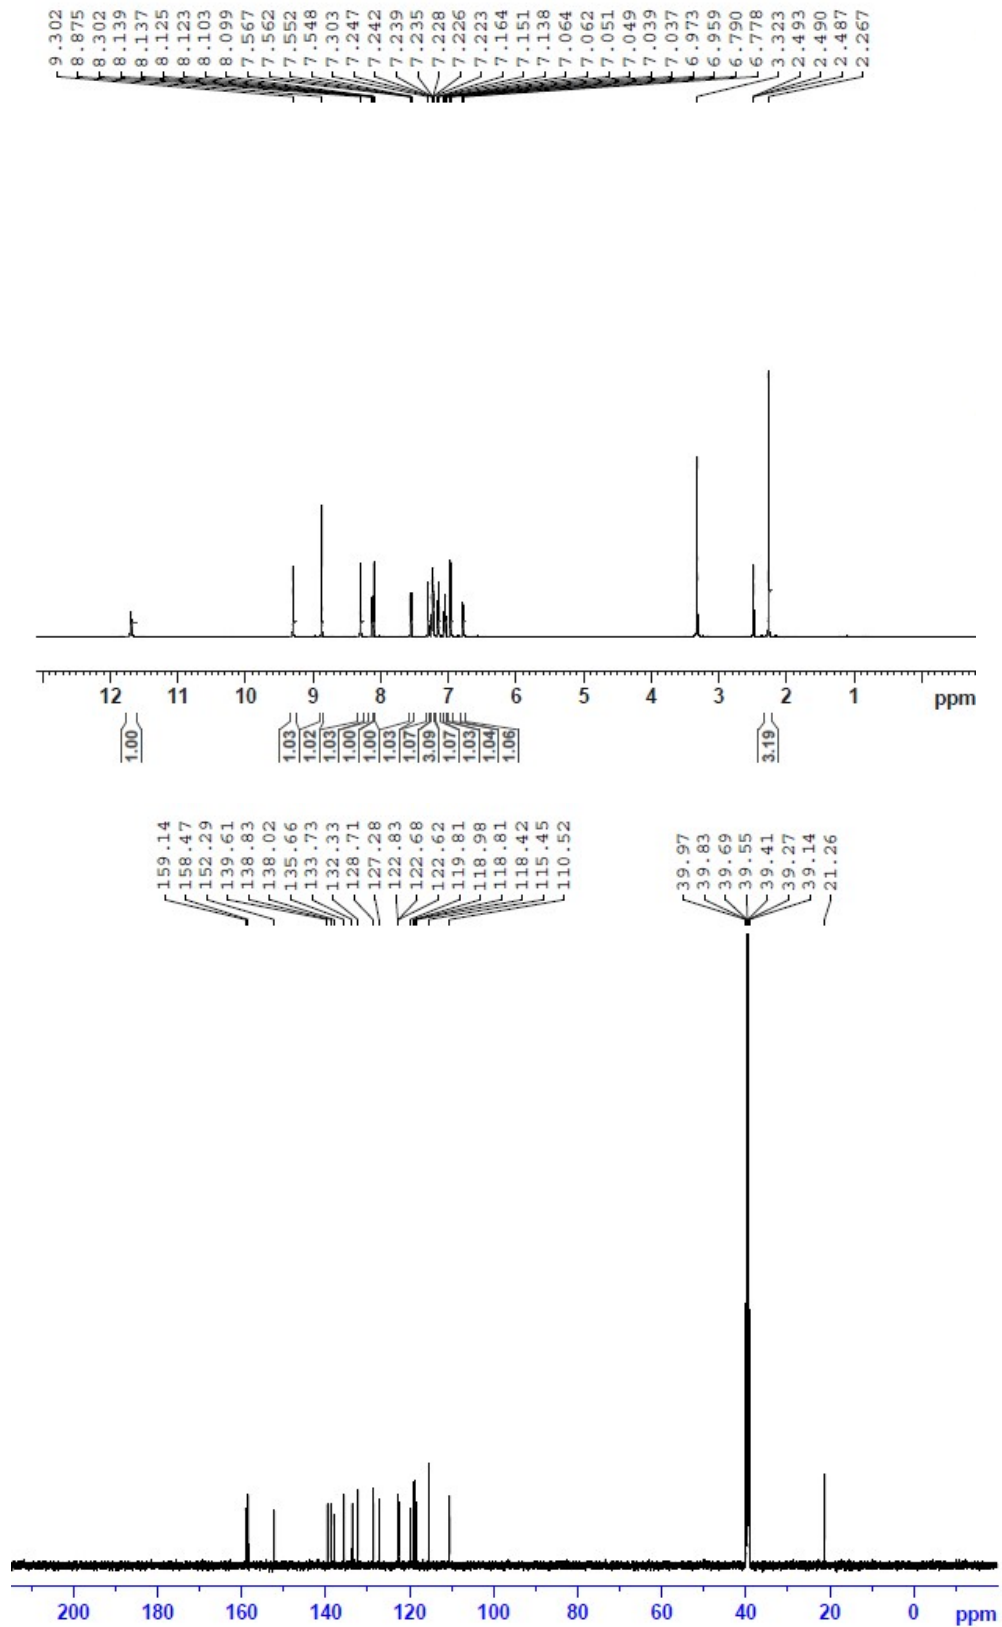

# <sup>1</sup>H NMR and <sup>13</sup>C NMR Spectra of 5o

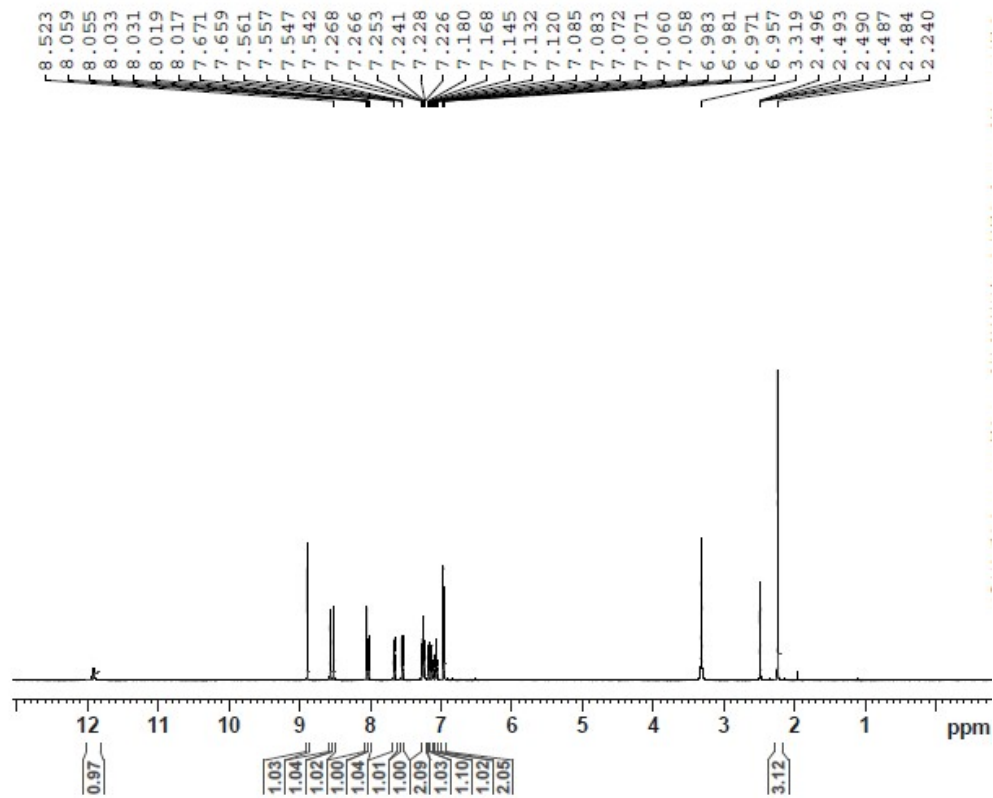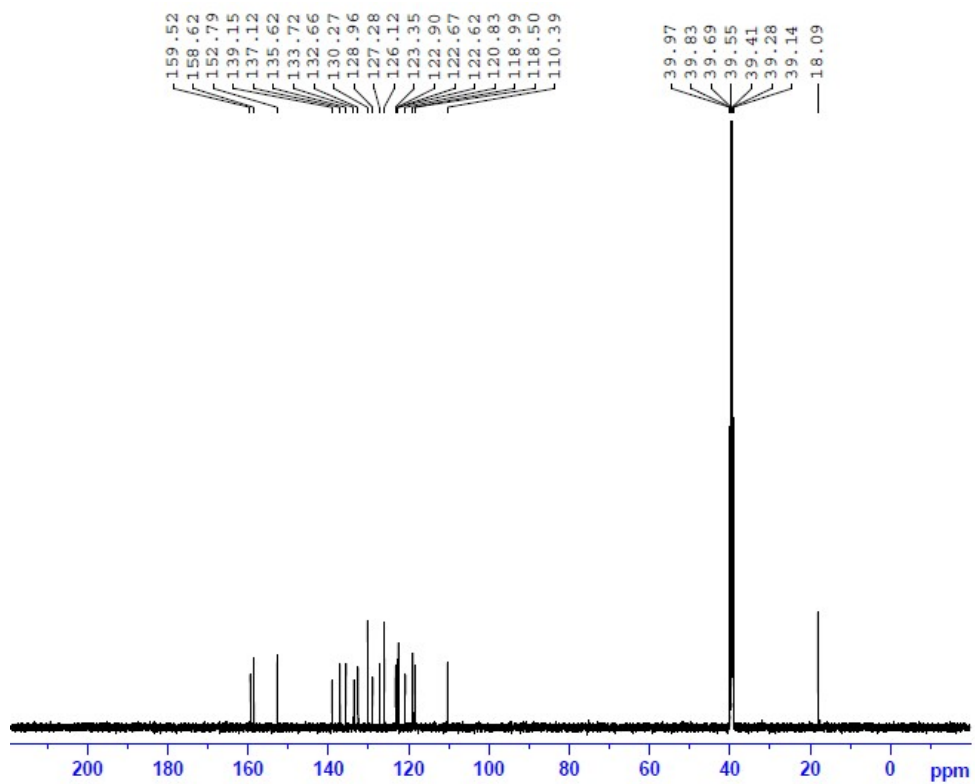

# <sup>1</sup>H NMR and <sup>13</sup>C NMR Spectra of 5p

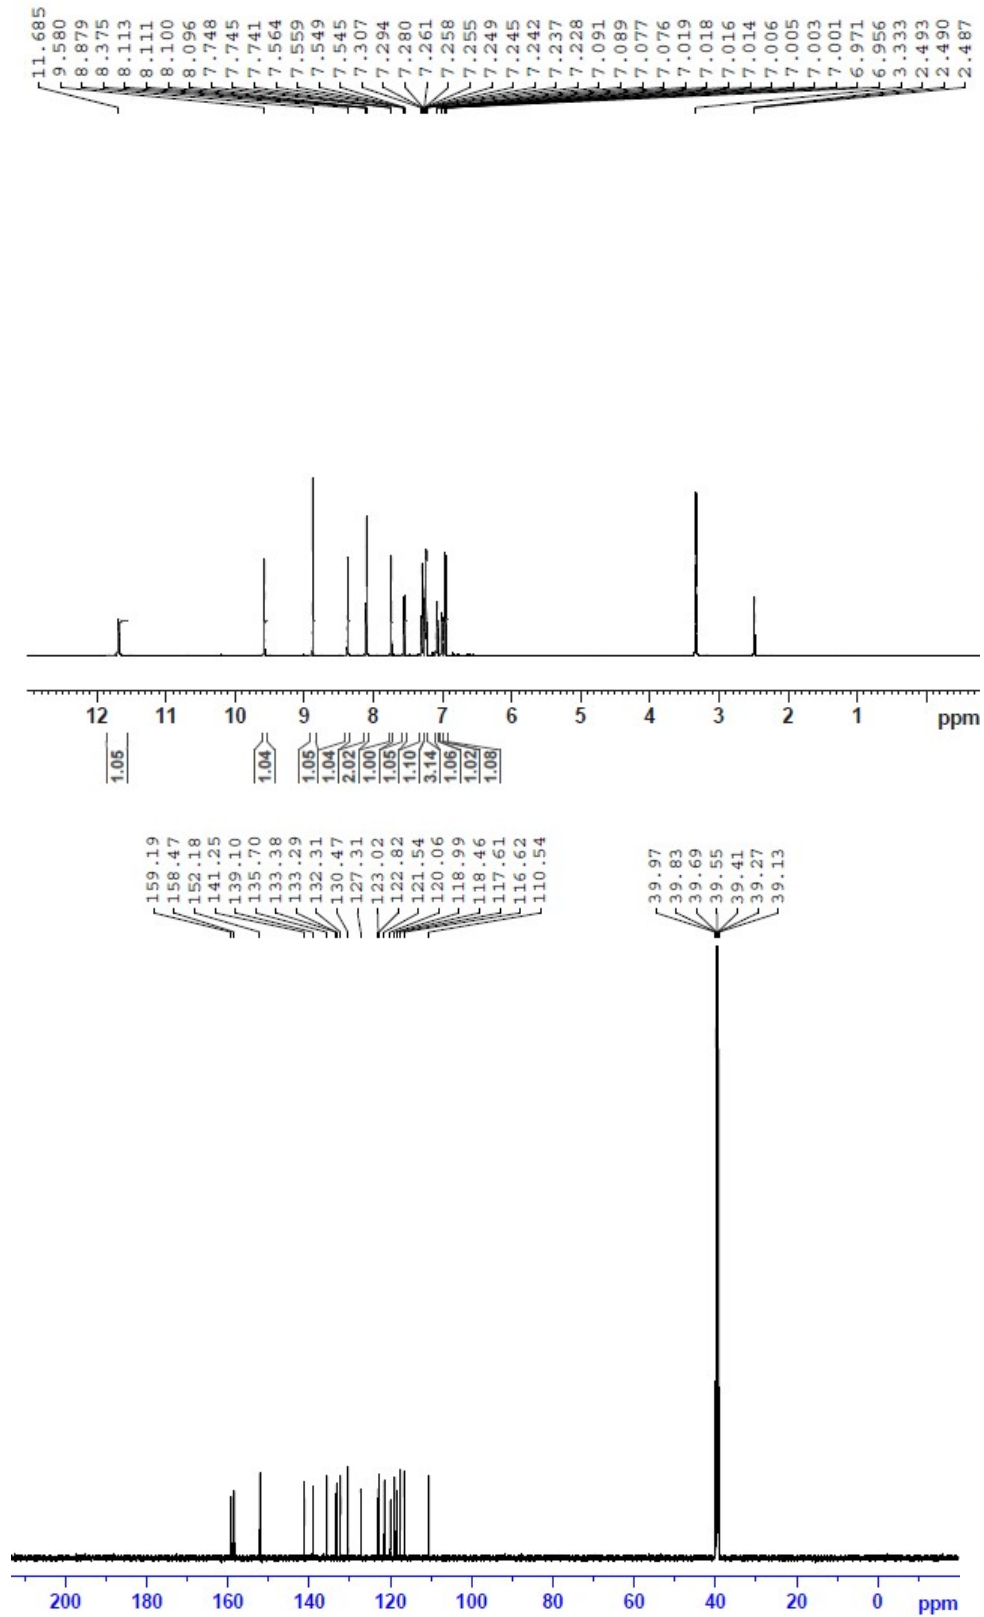



# $^1\text{H}$ NMR and $^{13}\text{C}$ NMR Spectra of 5q

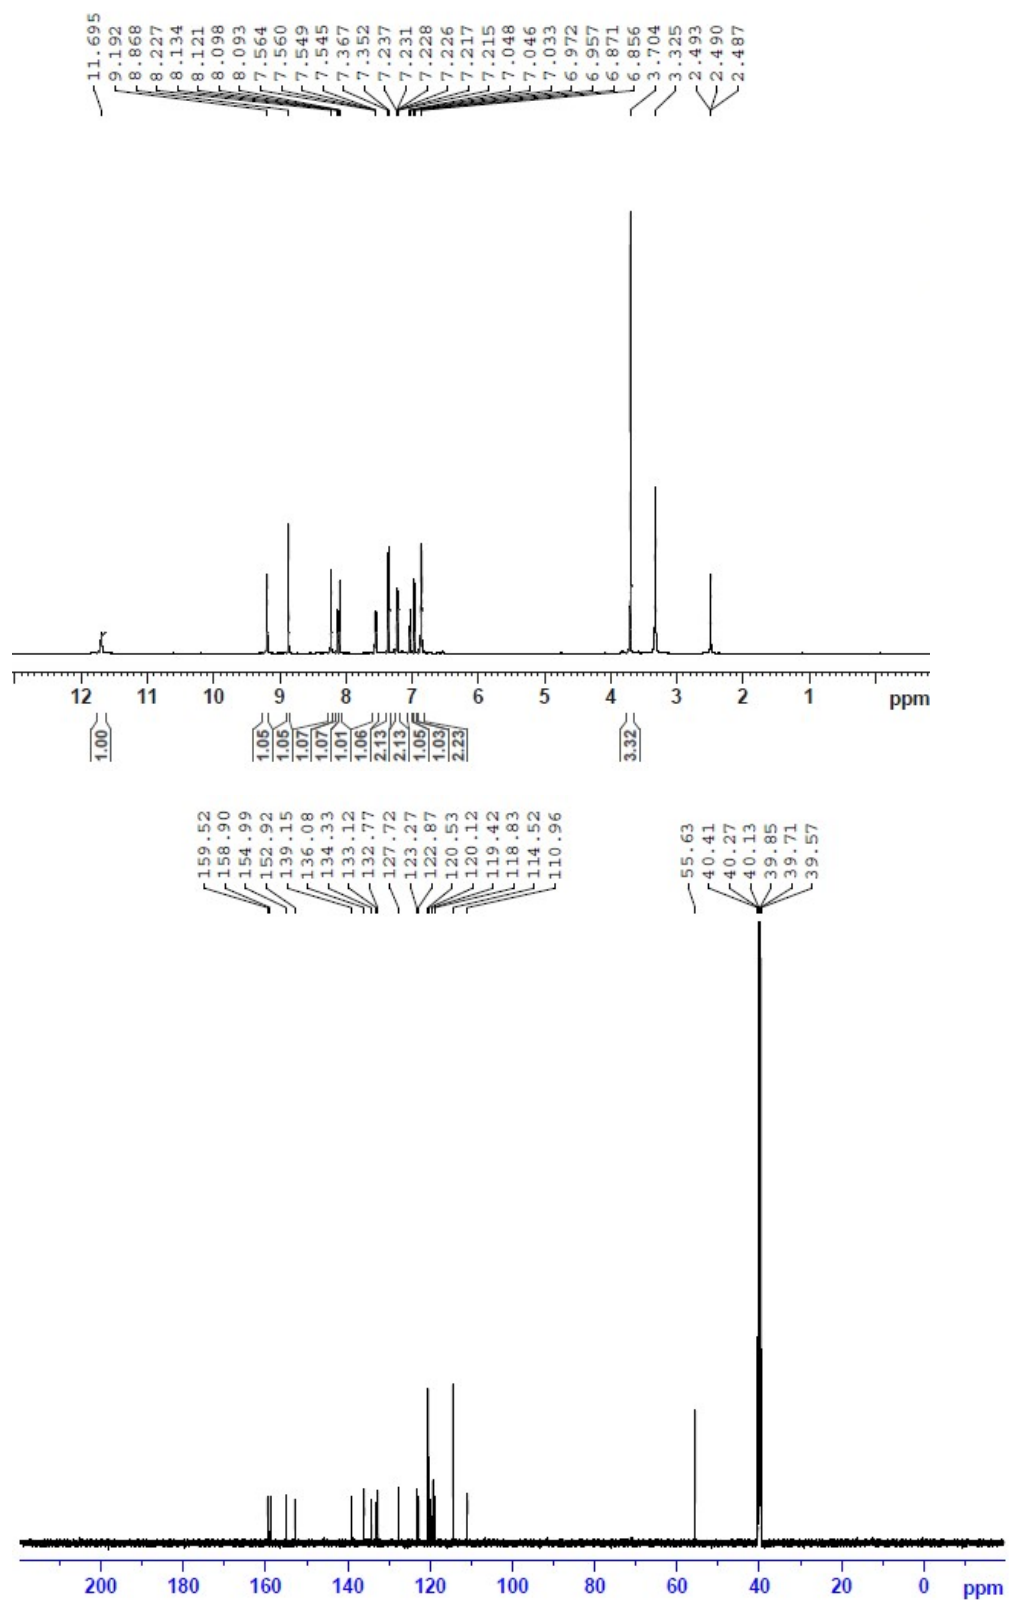

# <sup>1</sup>H NMR and <sup>13</sup>C NMR Spectra of 5r

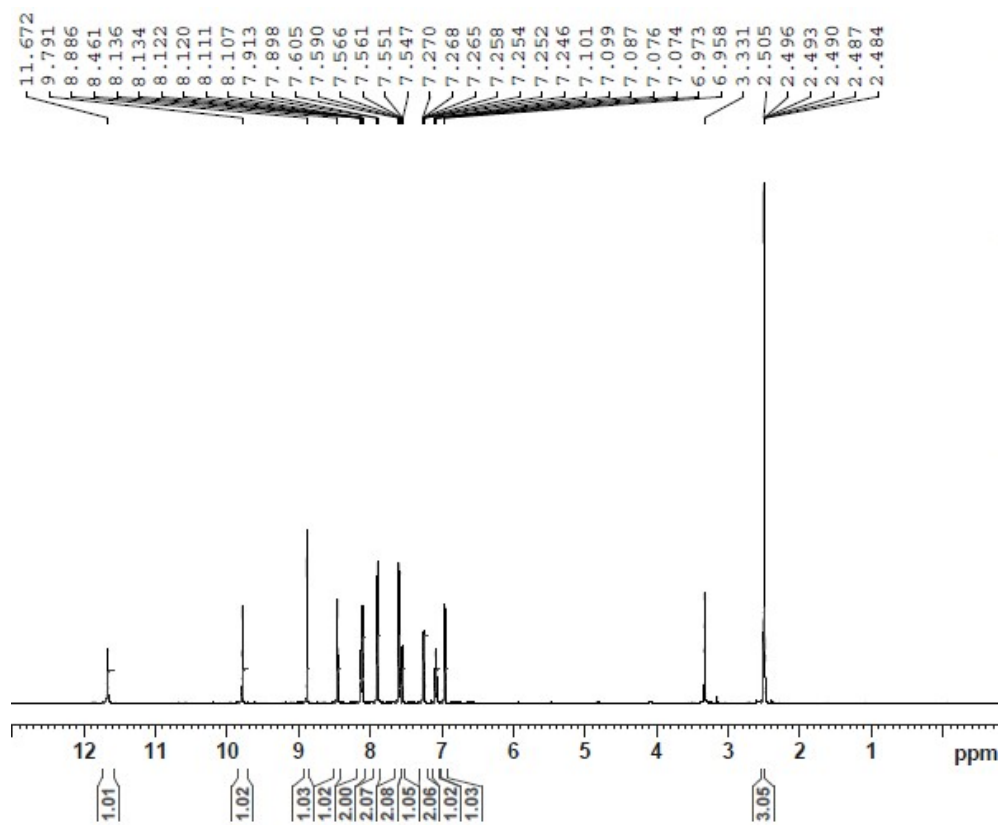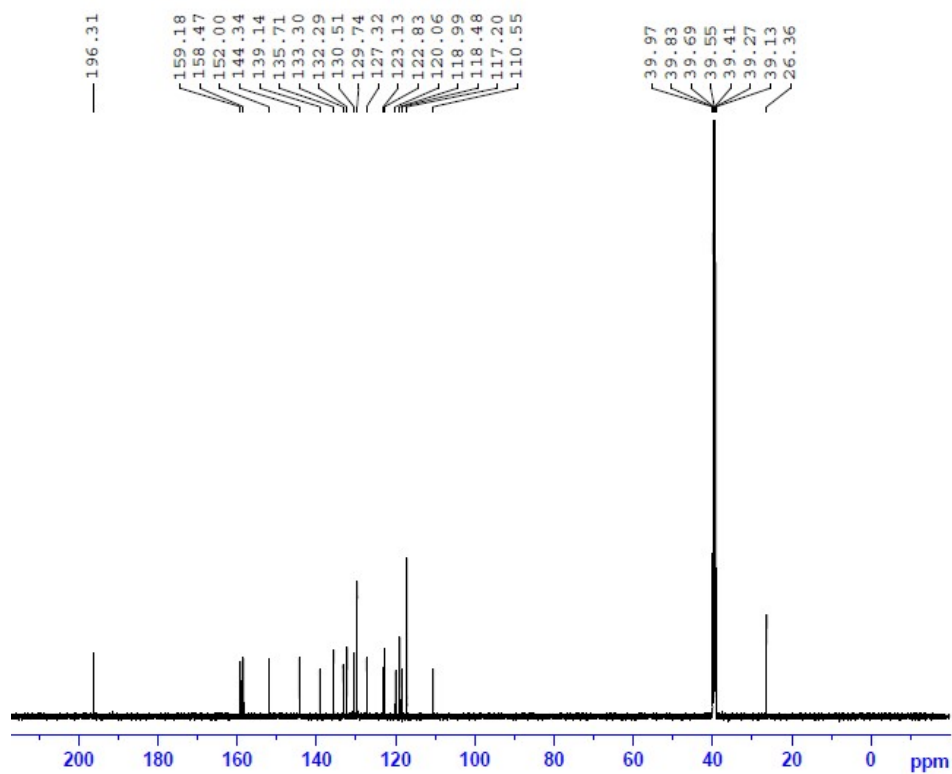

# <sup>1</sup>H NMR and <sup>13</sup>C NMR Spectra of 5s

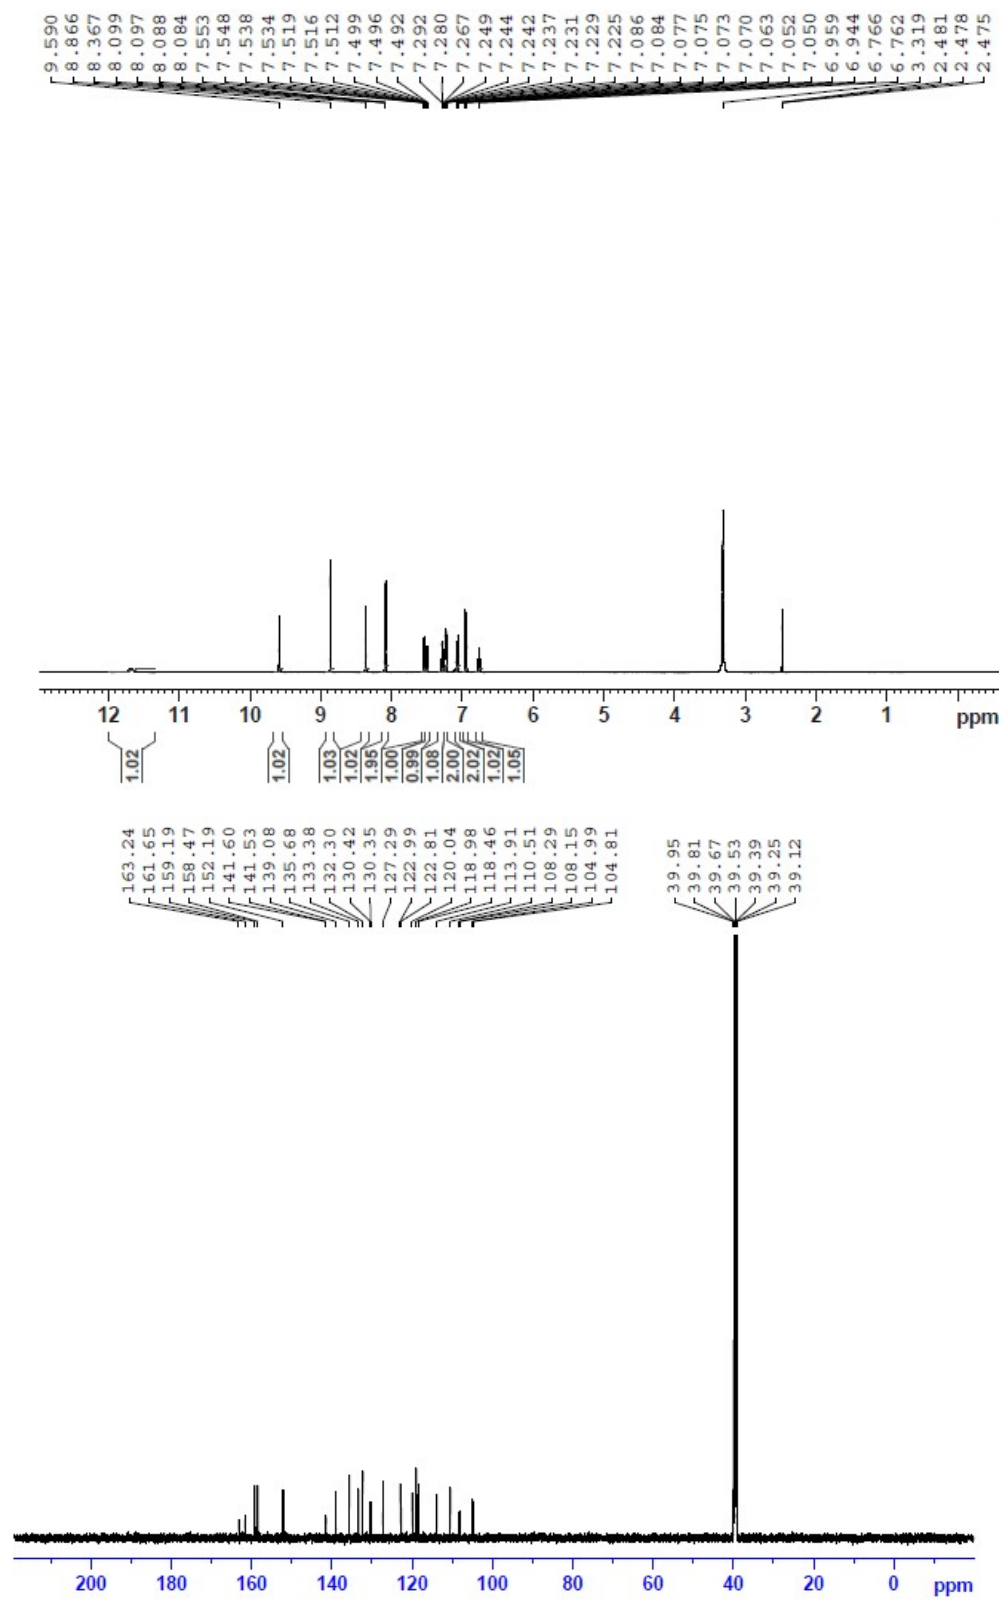

# $^1\text{H}$ NMR and $^{13}\text{C}$ NMR Spectra of 5t

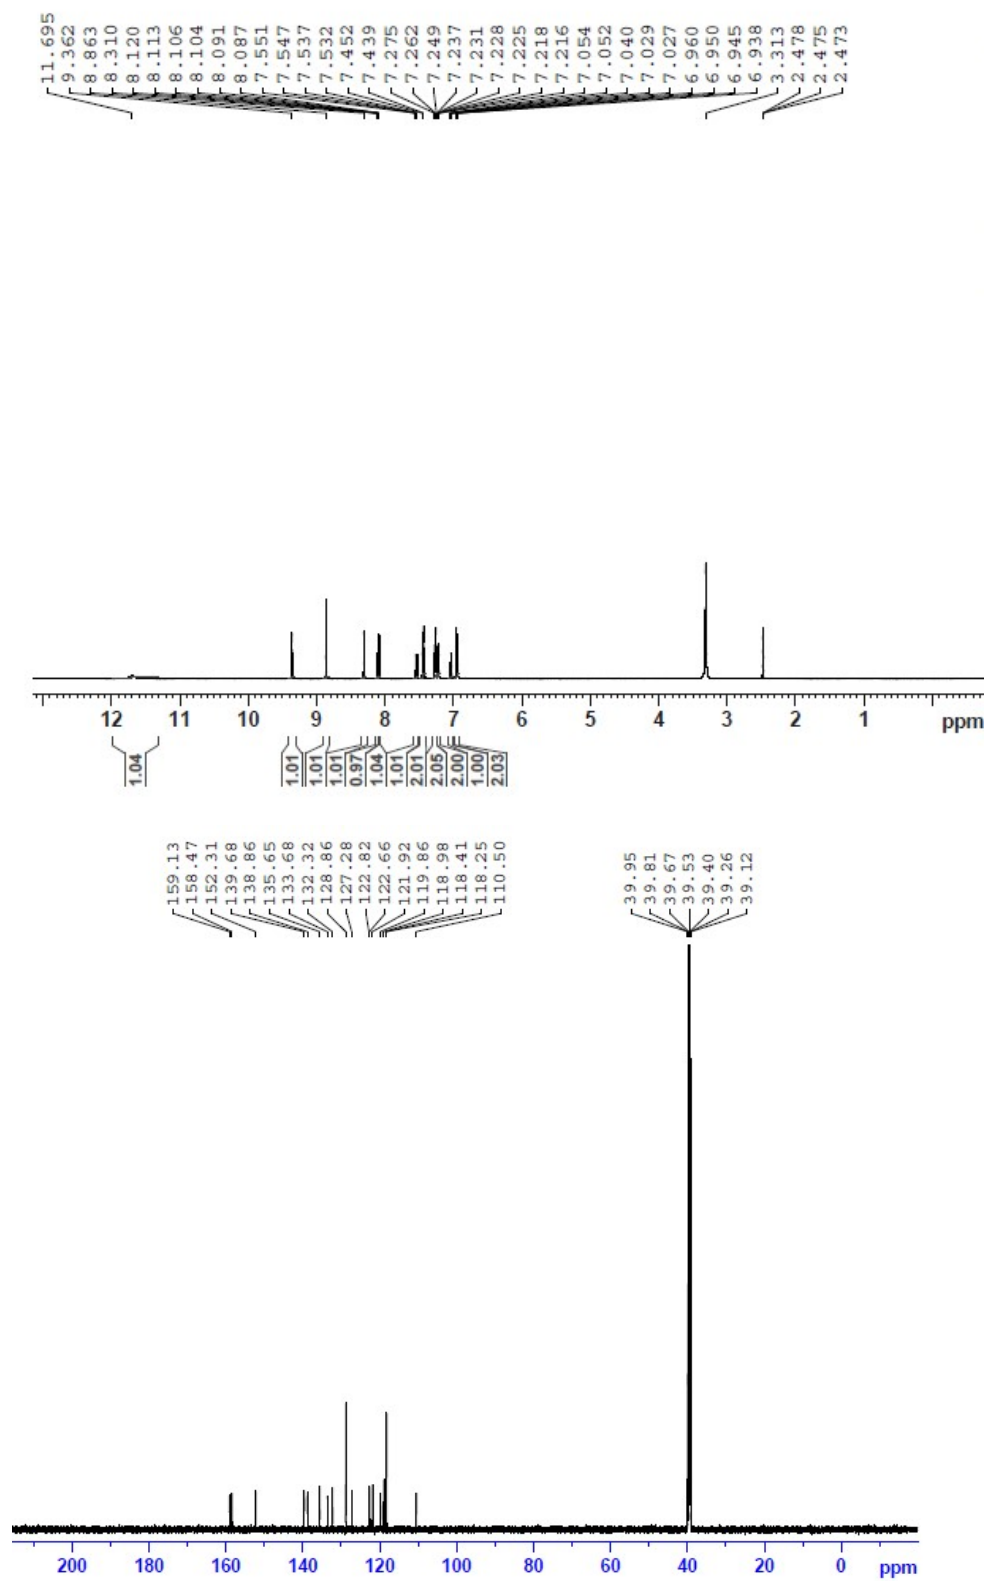

# $^1\text{H}$ NMR and $^{13}\text{C}$ NMR Spectra of 6a

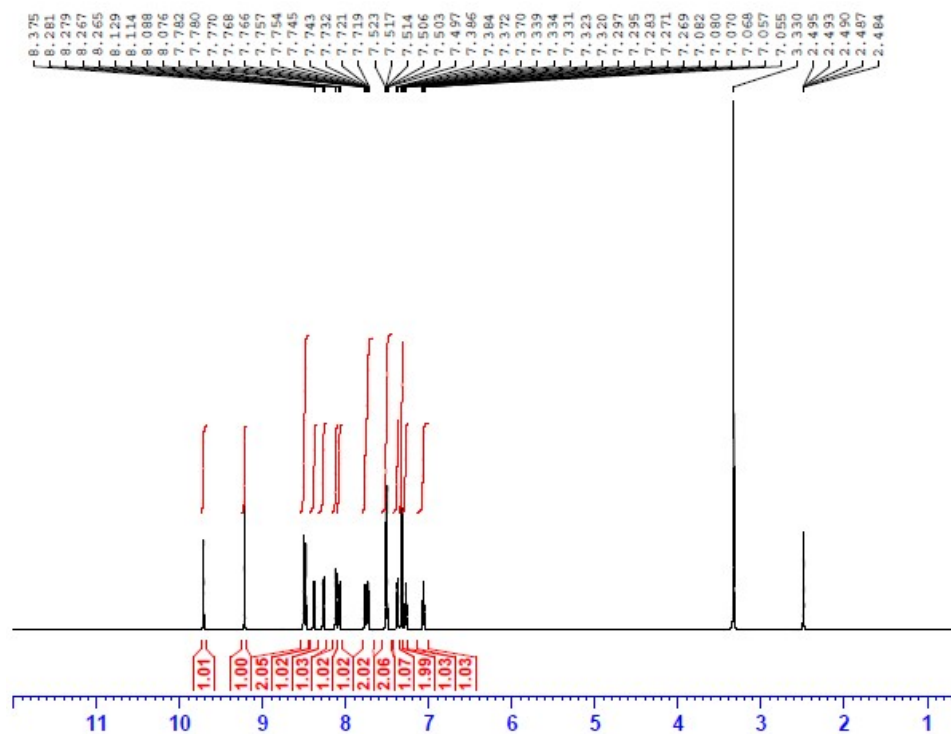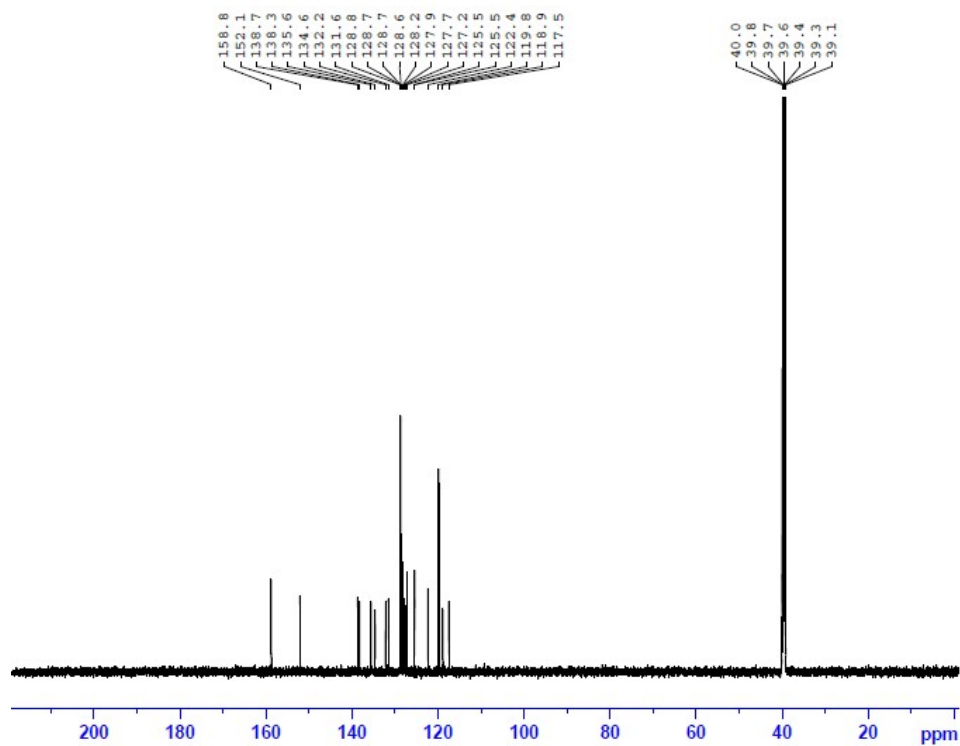

# <sup>1</sup>H NMR and <sup>13</sup>C NMR Spectra of 6b

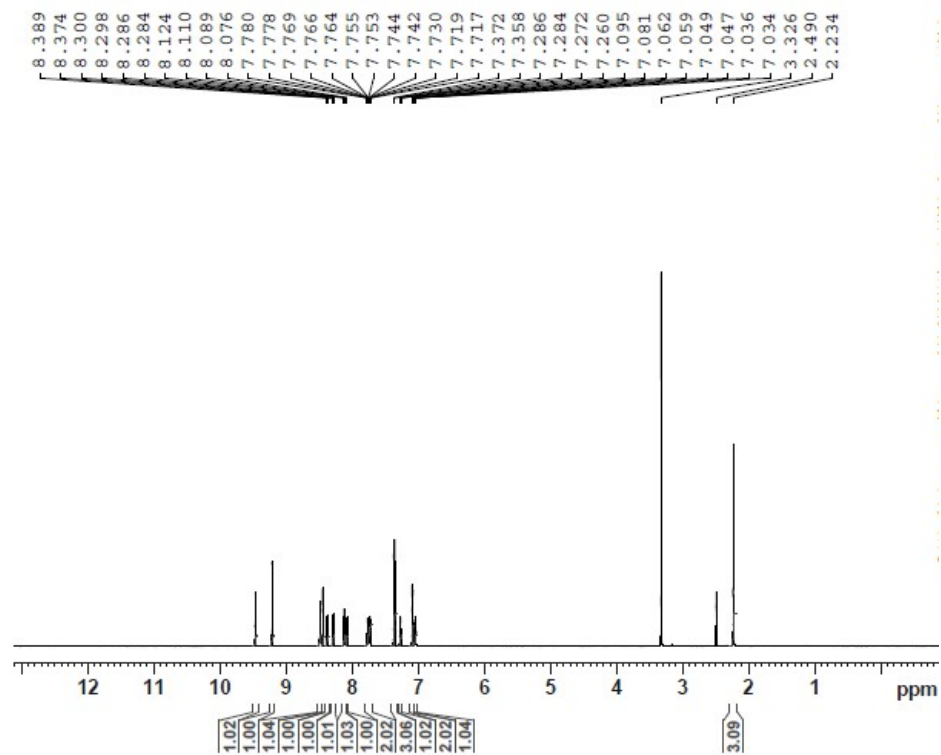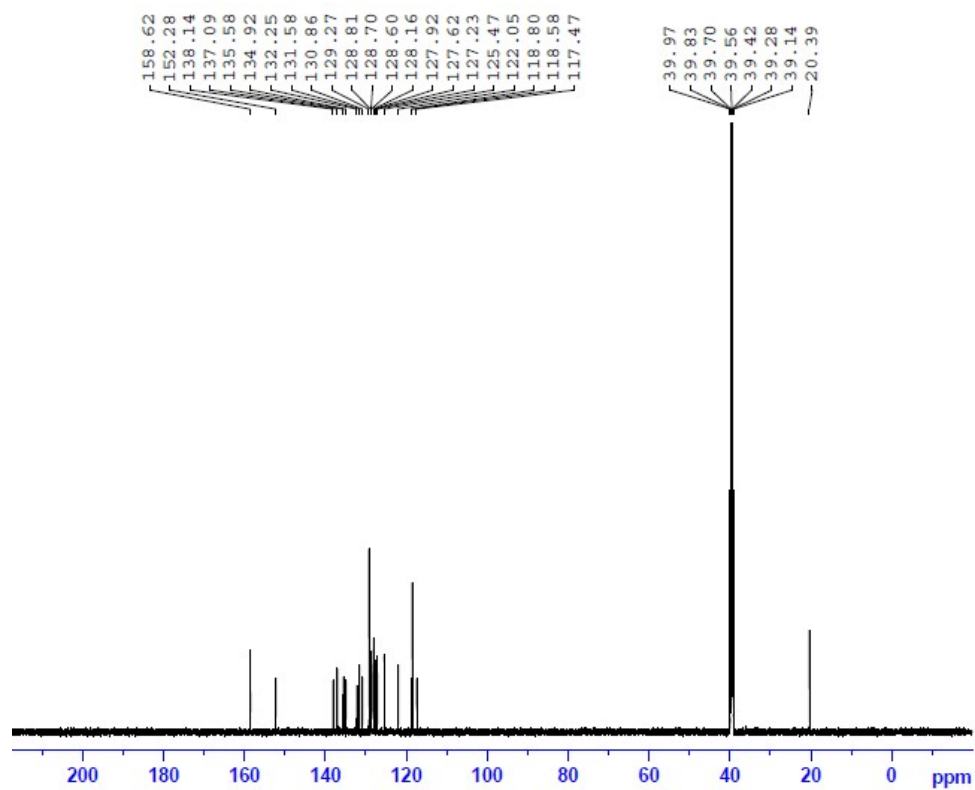

# <sup>1</sup>H NMR and <sup>13</sup>C NMR Spectra of 6c

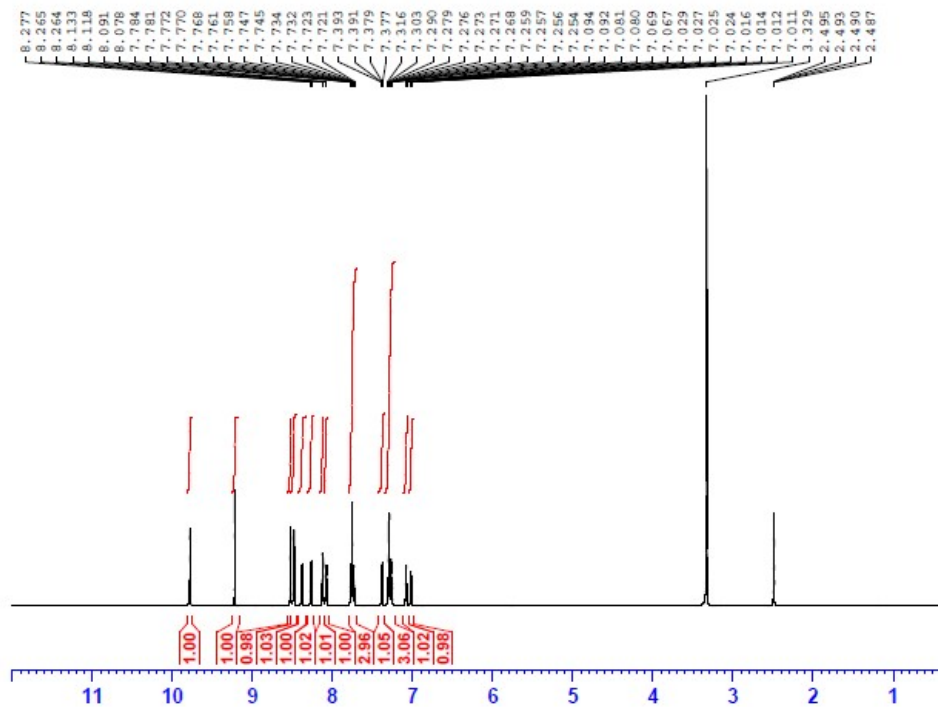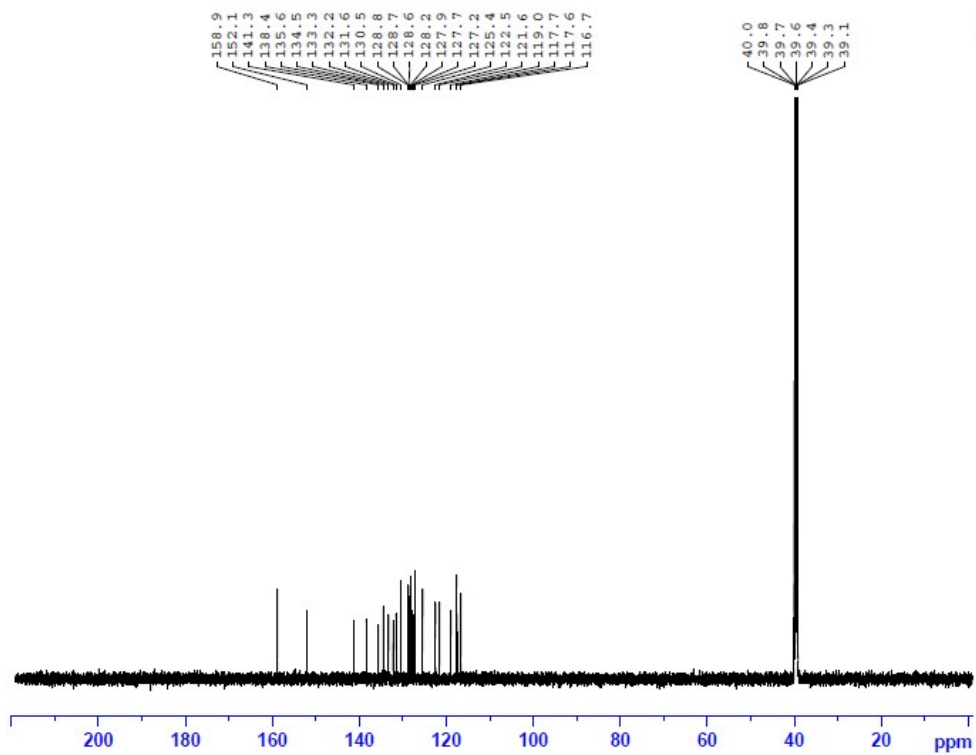

# $^1\text{H}$ NMR and $^{13}\text{C}$ NMR Spectra of 6d

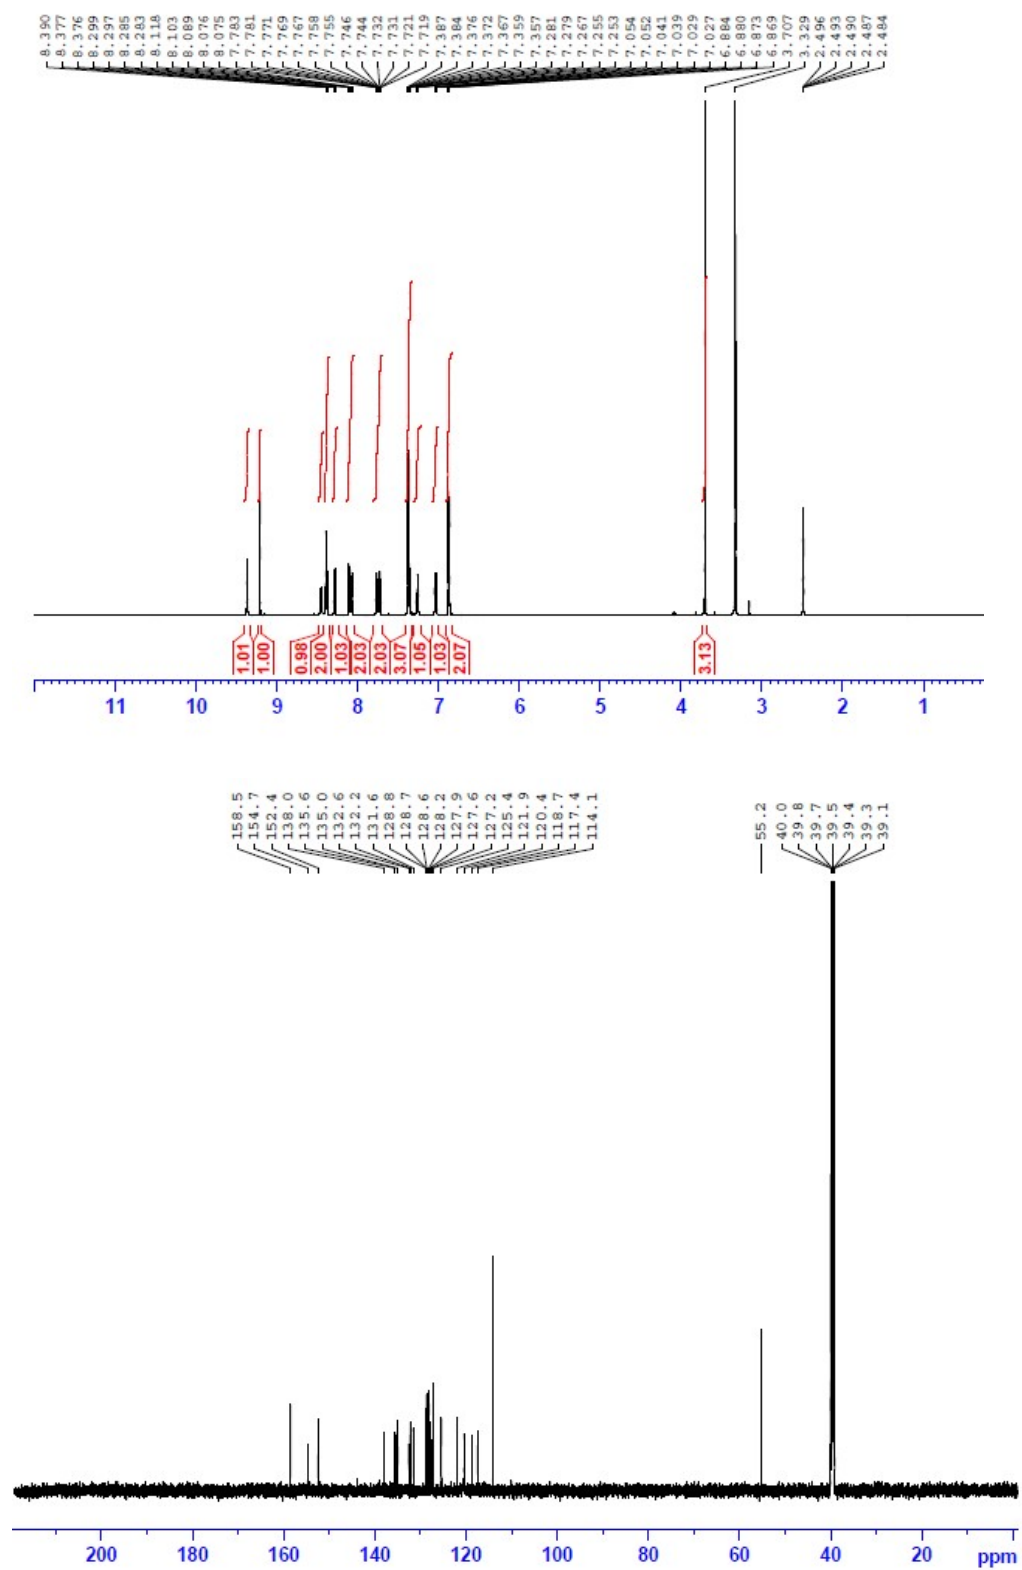

(6d)  $^{13}\text{C}$ -NMR



# <sup>1</sup>H NMR and <sup>13</sup>C NMR Spectra of 6e

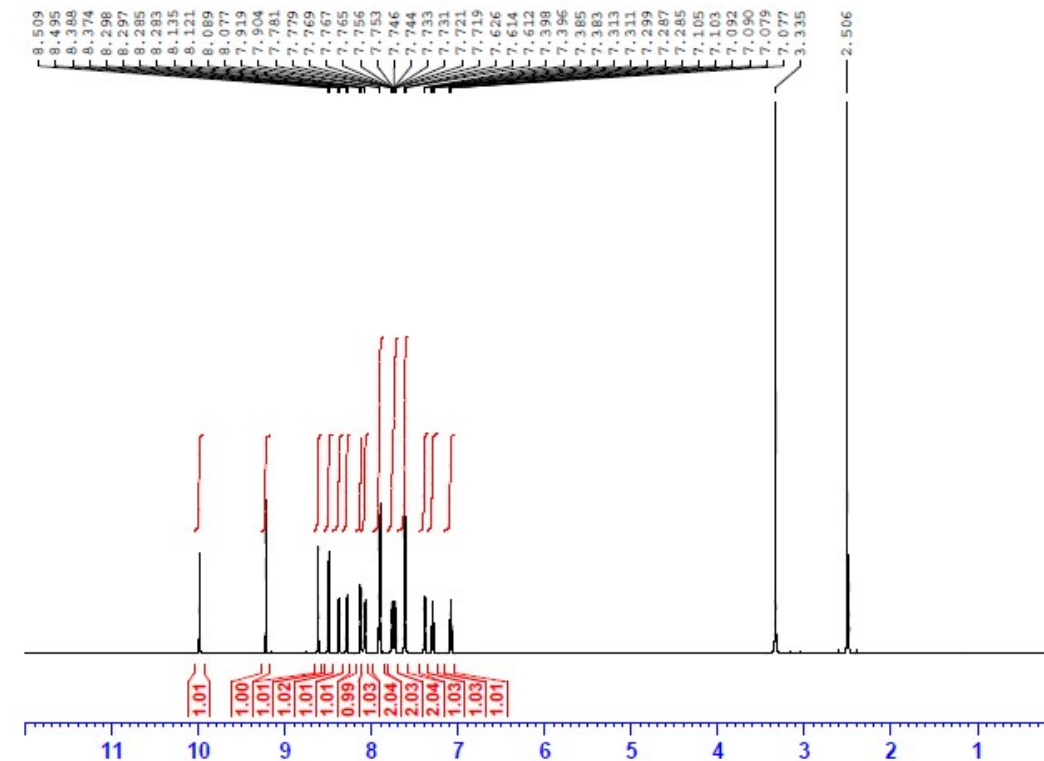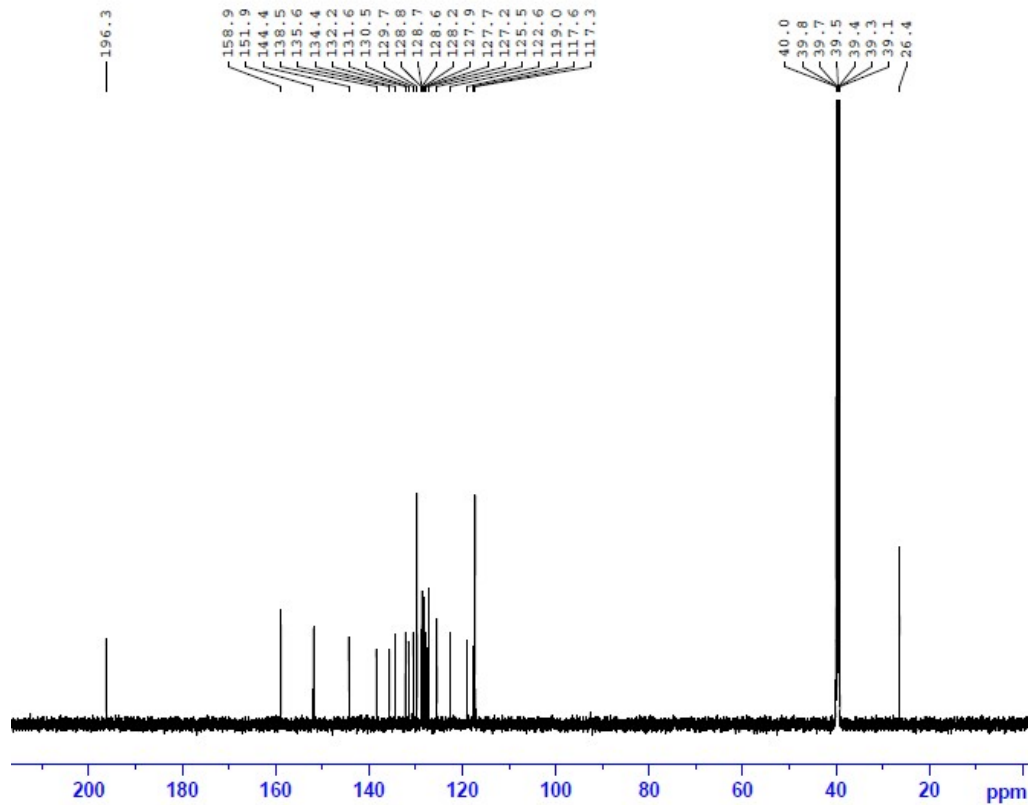

# <sup>1</sup>H NMR and <sup>13</sup>C NMR Spectra of 6f

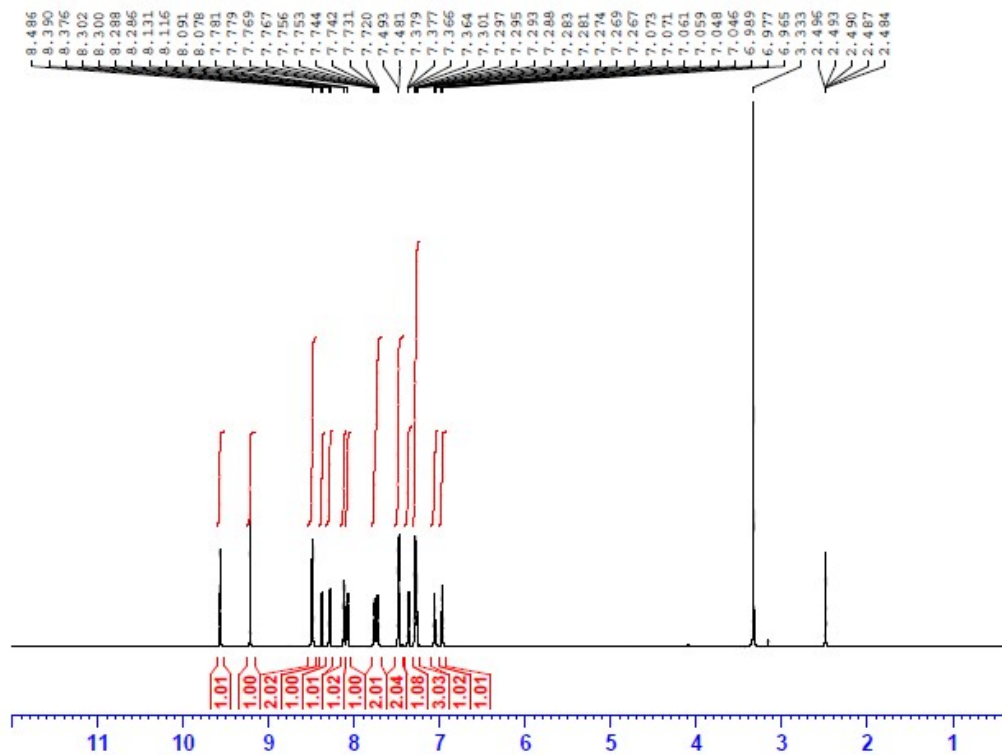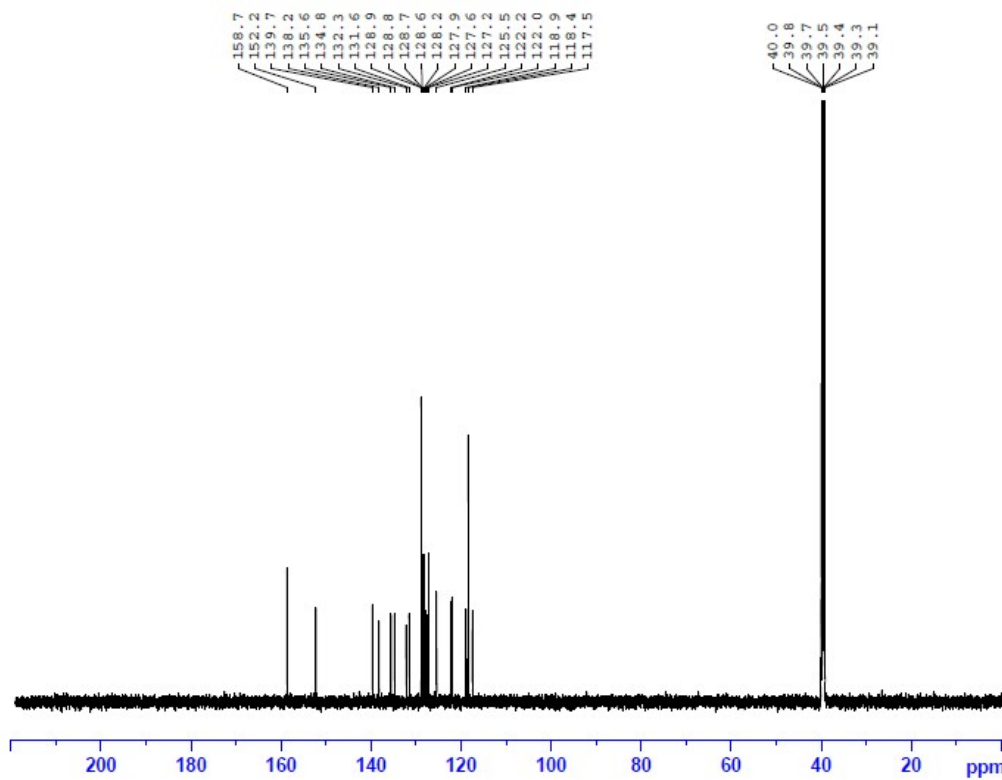

(6f) <sup>13</sup>C-NMR

# $^1\text{H}$ NMR and $^{13}\text{C}$ NMR Spectra of 6g

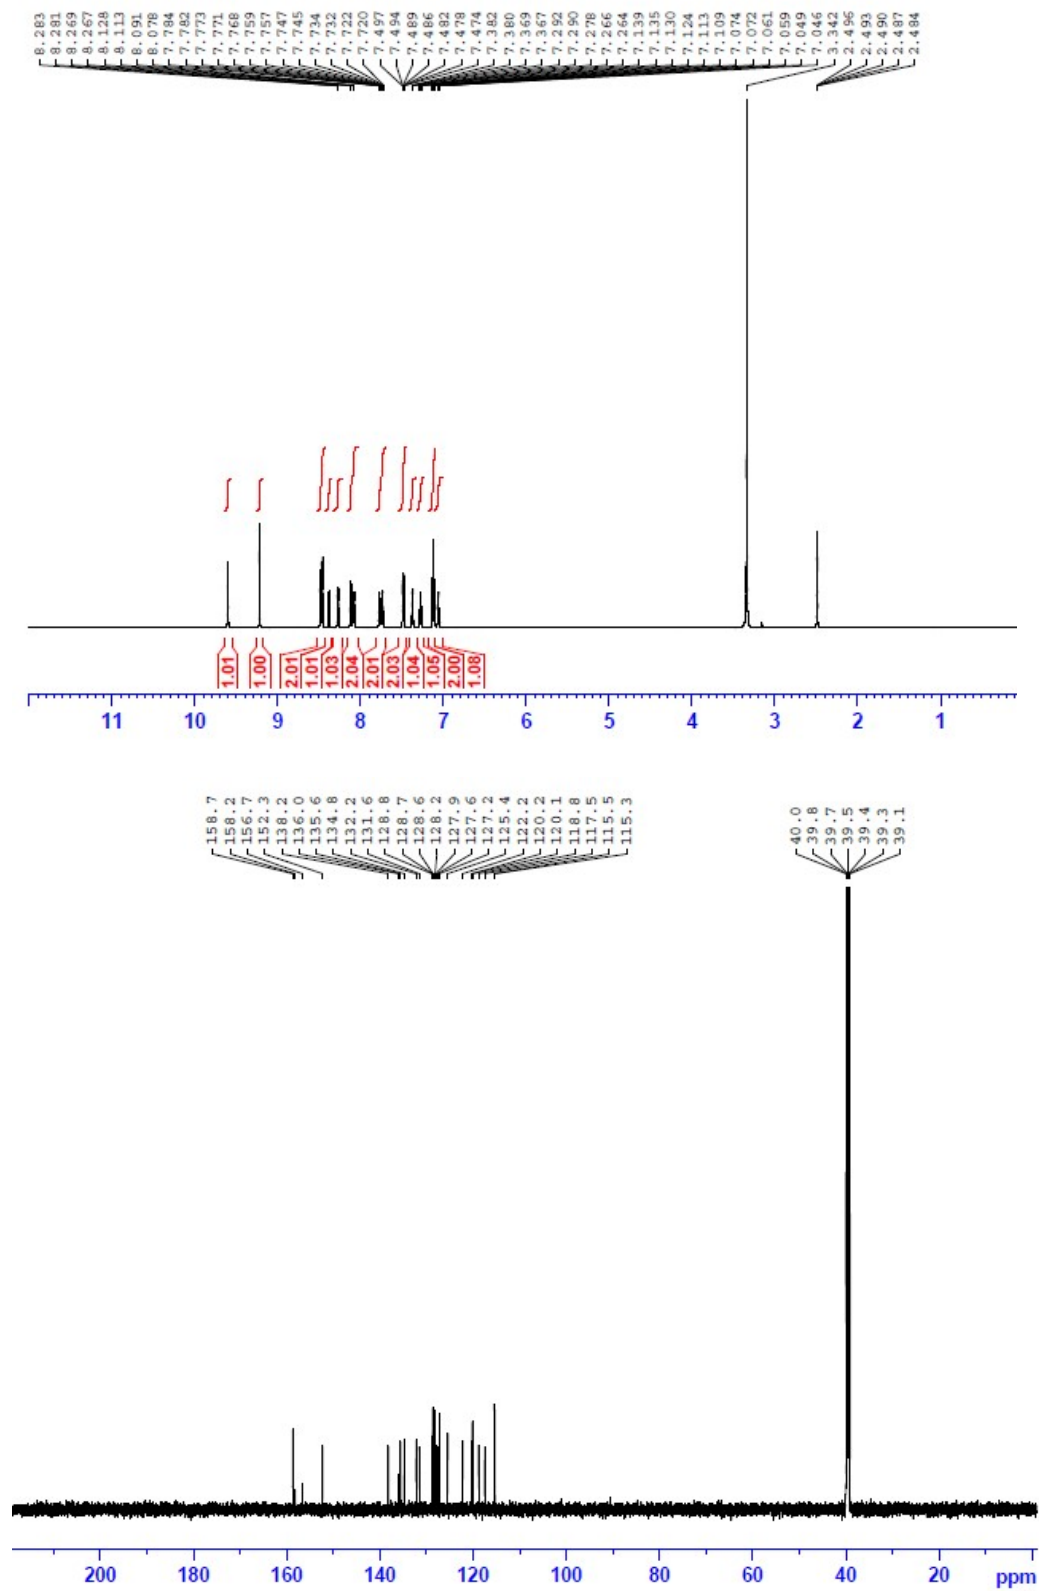

# <sup>1</sup>H NMR and <sup>13</sup>C NMR Spectra of 6h

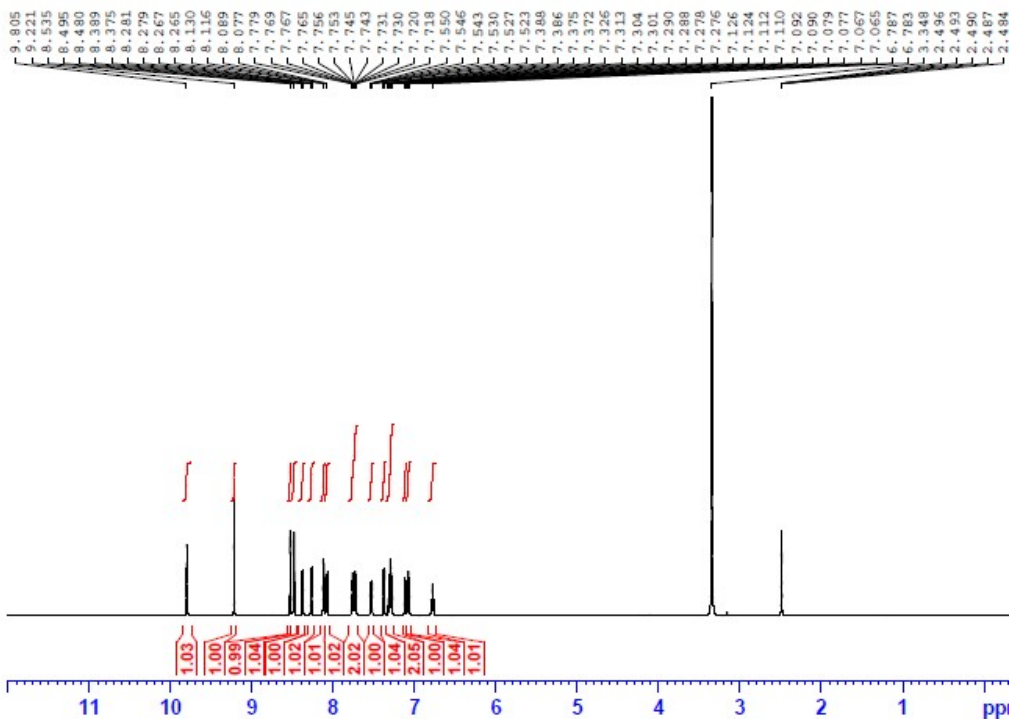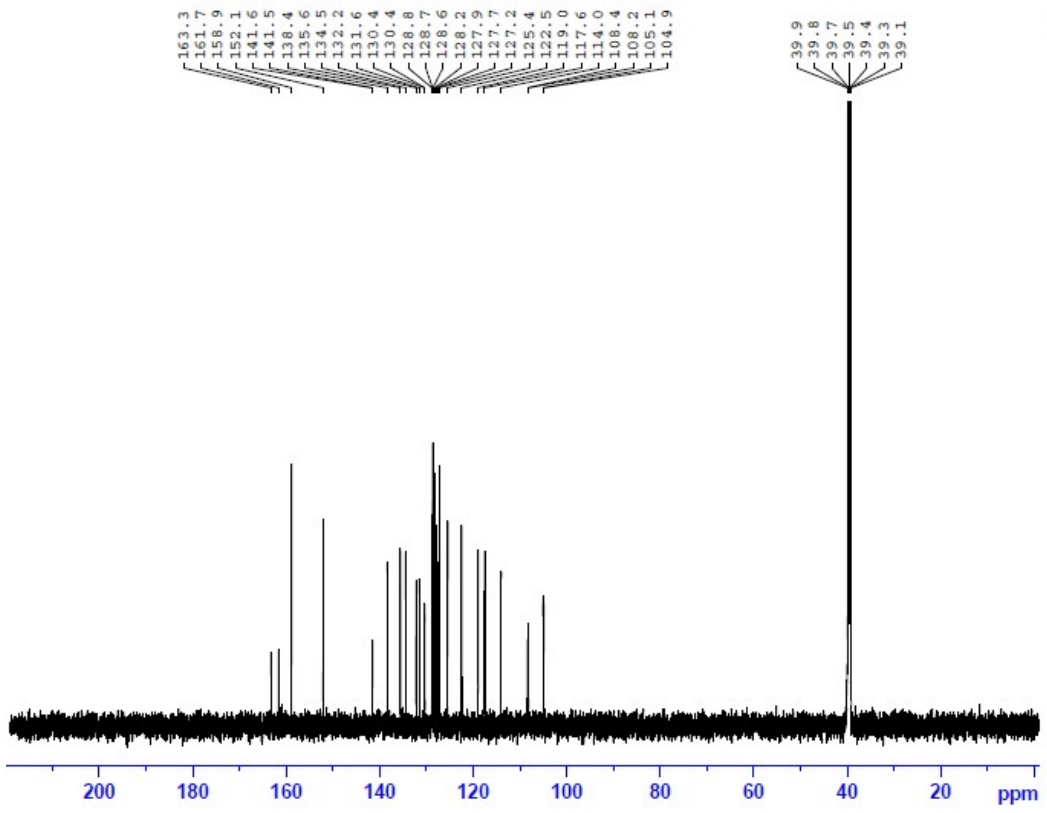

# <sup>1</sup>H NMR and <sup>13</sup>C NMR Spectra of 6i

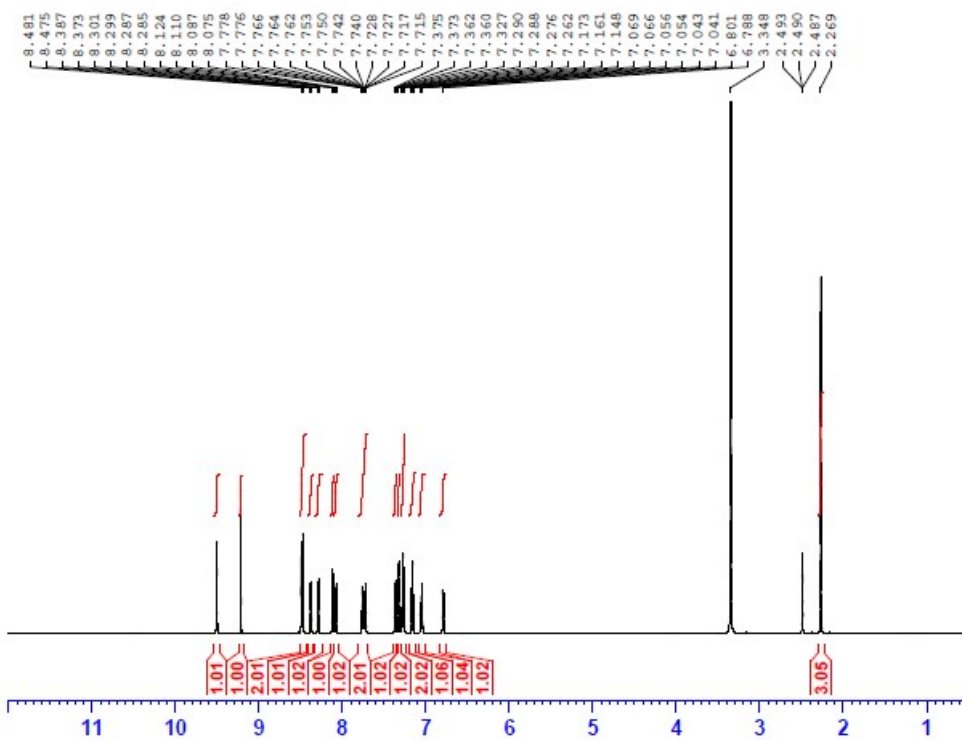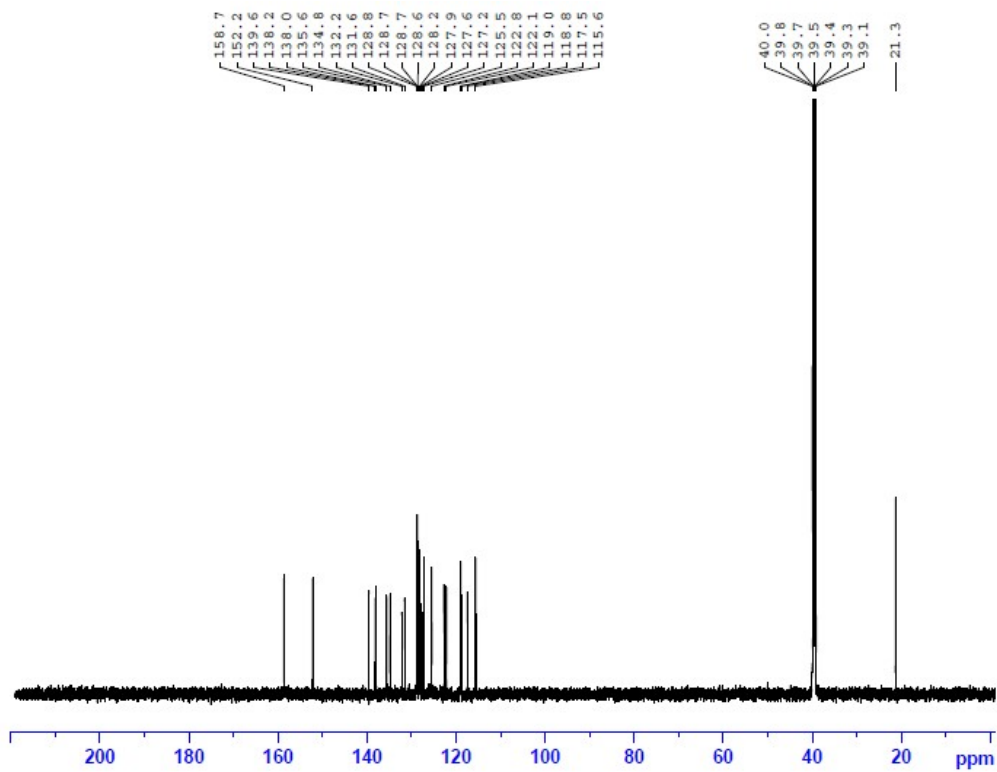

# <sup>1</sup>H NMR and <sup>13</sup>C NMR Spectra of 6j

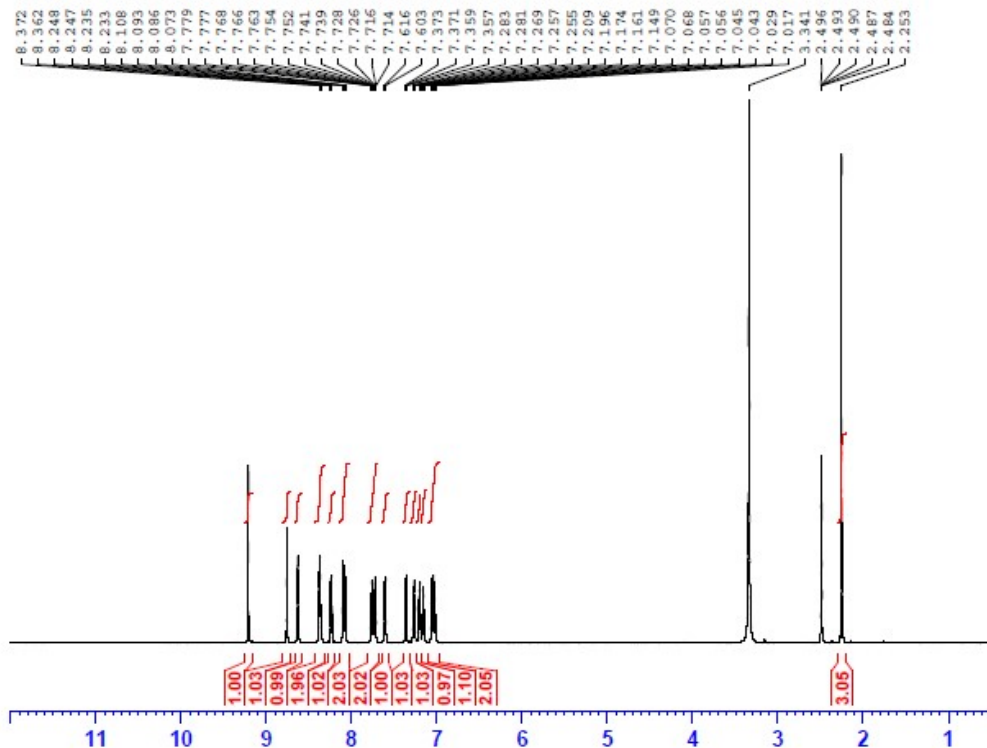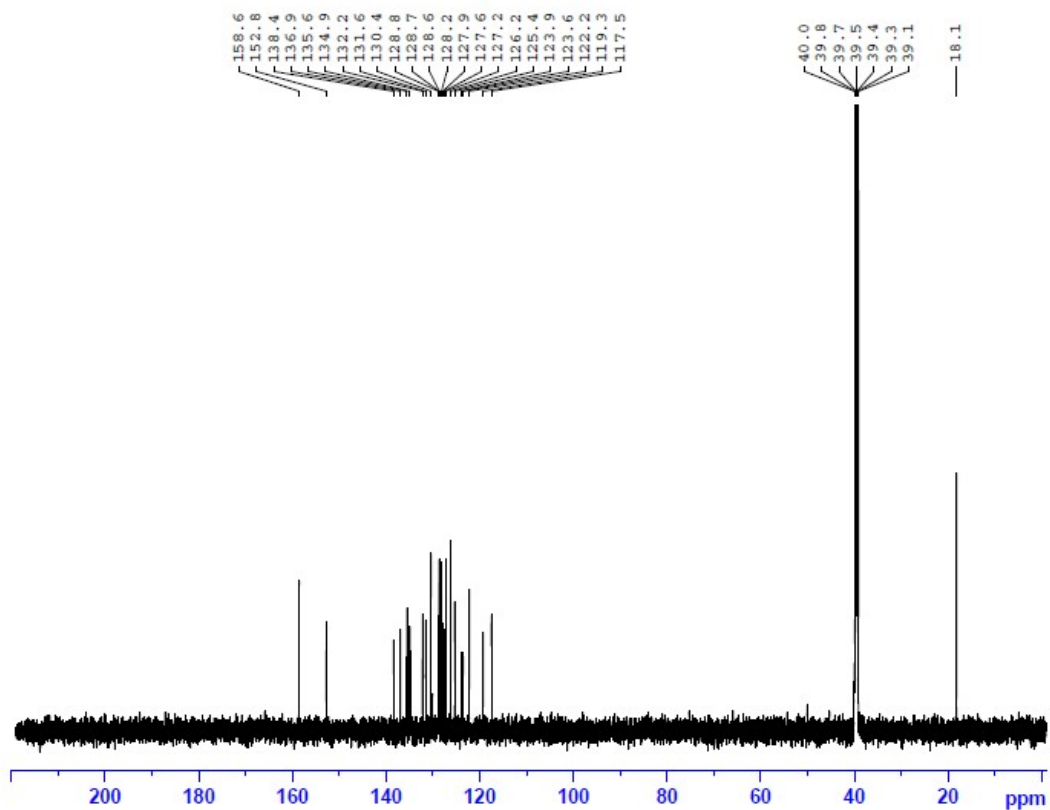

# HPLC Chromatogram of 5a

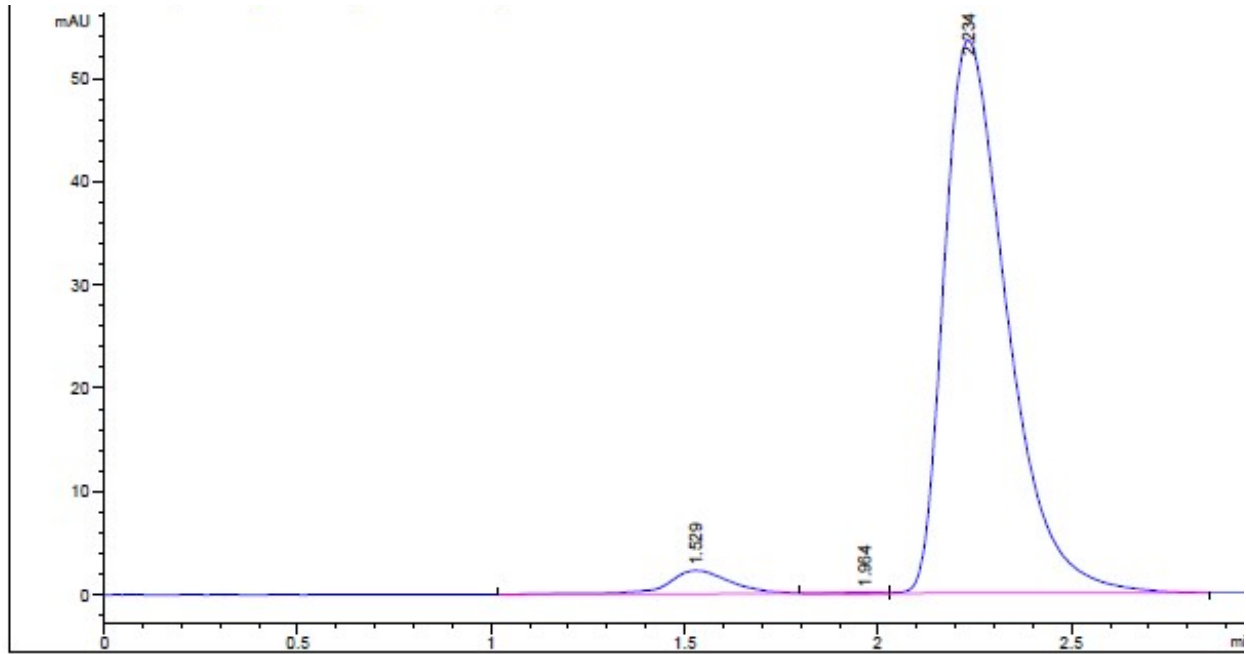

=====  
Area Percent Report  
=====

Sorted By : Signal  
Multiplier : 1.0000  
Dilution : 1.0000  
Use Multiplier & Dilution Factor with ISTDs

Signal 1: VWD1 A, Wavelength=363 nm

| Peak # | RetTime [min] | Type | Width [min] | Area [mAU*s] | Height [mAU] | Area %  |
|--------|---------------|------|-------------|--------------|--------------|---------|
| 1      | 1.529         | BV R | 0.1777      | 27.12323     | 2.28710      | 4.2747  |
| 2      | 1.964         | W E  | 0.1214      | 1.08572      | 1.25387e-1   | 0.1711  |
| 3      | 2.234         | VB   | 0.1743      | 606.29761    | 53.54283     | 95.5542 |

# HPLC Chromatogram of 5b

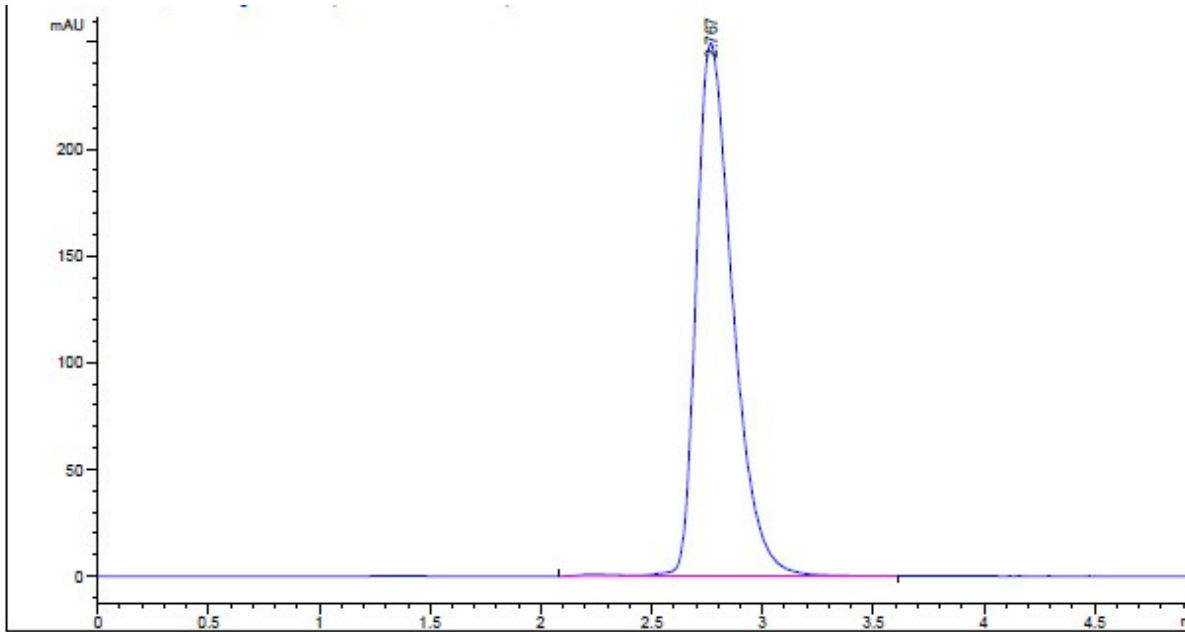

=====  
Area Percent Report  
=====

Sorted By : Signal  
Multiplier : 1.0000  
Dilution : 1.0000  
Sample Amount: : 1.490000000e-2 [ng/ul] (not used in calc.)  
Use Multiplier & Dilution Factor with ISTDs

Signal 1: VWD1 A, Wavelength=363 nm

| Peak # | RetTime [min] | Type | Width [min] | Area [mAU*s] | Height [mAU] | Area %   |
|--------|---------------|------|-------------|--------------|--------------|----------|
| 1      | 2.767         | VB R | 0.1762      | 2865.18433   | 249.45692    | 100.0000 |

=====  
Total: 2865.18433 249.45692  
=====



# HPLC Chromatogram of 5c

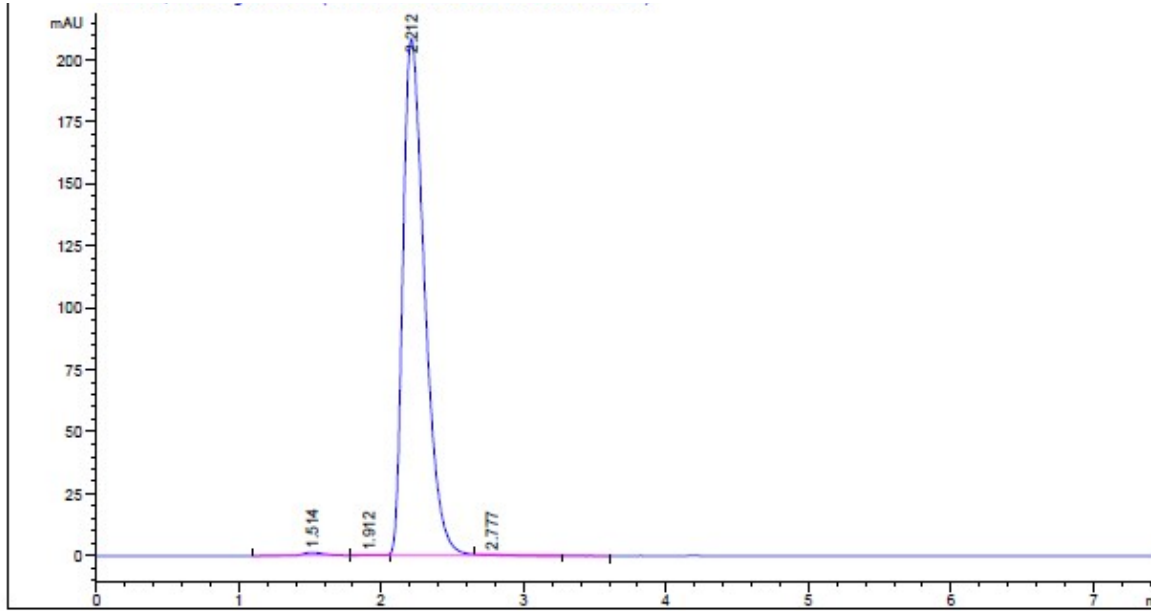

=====  
 Area Percent Report  
 =====

Sorted By : Signal  
 Calib. Data Modified : Saturday, October 29, 2022 12:16:02 PM  
 Multiplier : 1.0000  
 Dilution : 1.0000  
 Sample Amount: : 9.30000000e-3 [ng/ul] (not used in calc.)  
 Use Multiplier & Dilution Factor with ISTDs

Signal 1: VWD1 A, Wavelength=363 nm

| Peak # | RetTime [min] | Type | Width [min] | Area [mAU*s] | Area %  | Name |
|--------|---------------|------|-------------|--------------|---------|------|
| 1      | 1.514         | VB R | 0.1598      | 13.14060     | 0.5927  | ?    |
| 2      | 1.912         | BV E | 0.1513      | 2.56966      | 0.1159  | ?    |
| 3      | 2.212         | VV R | 0.1639      | 2197.85620   | 99.1341 | ?    |
| 4      | 2.777         | VB E | 0.1909      | 3.48621      | 0.1572  | ?    |

# HPLC Chromatogram of 5d

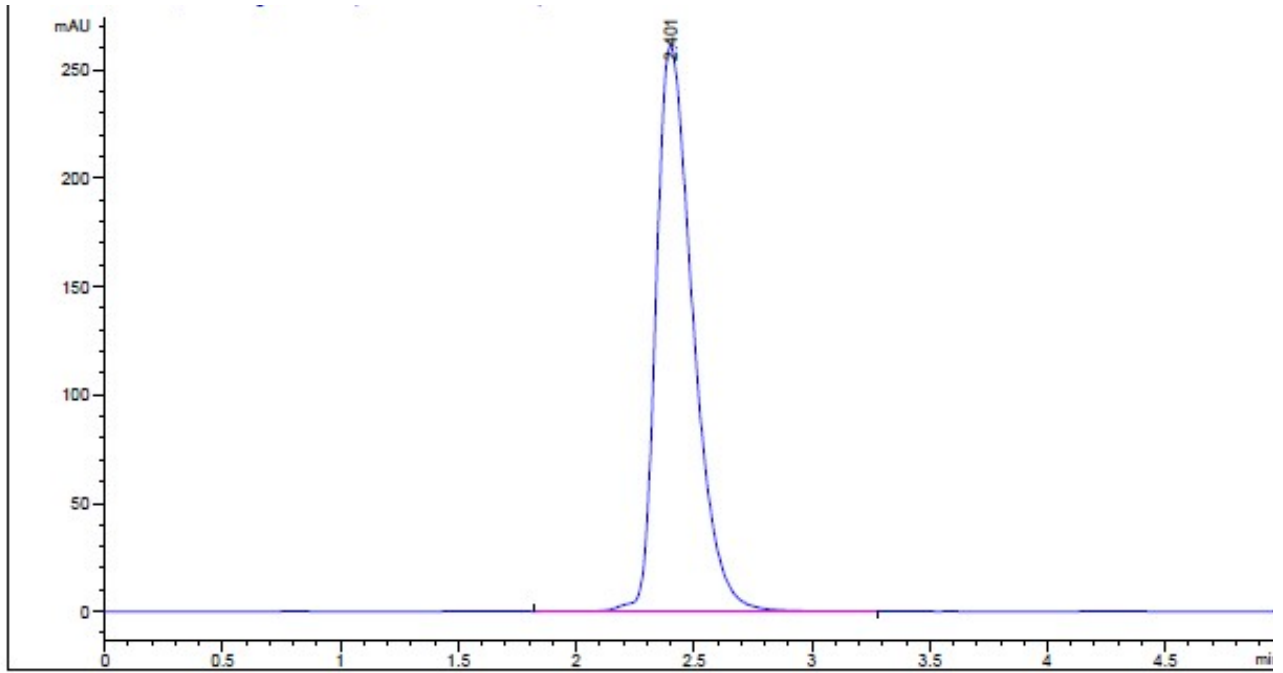

=====  
Area Percent Report  
=====

Sorted By : Signal  
Multiplier : 1.0000  
Dilution : 1.0000  
Sample Amount: : 1.050000000e-2 [ng/ul] (not used in calc.)  
Use Multiplier & Dilution Factor with ISTDs

Signal 1: VWD1 A, Wavelength=363 nm

| Peak # | RetTime [min] | Type | Width [min] | Area [mAU*s] | Height [mAU] | Area %   |
|--------|---------------|------|-------------|--------------|--------------|----------|
| 1      | 2.401         | BB   | 0.1677      | 2842.89111   | 261.35452    | 100.0000 |

# HPLC Chromatogram of 5e

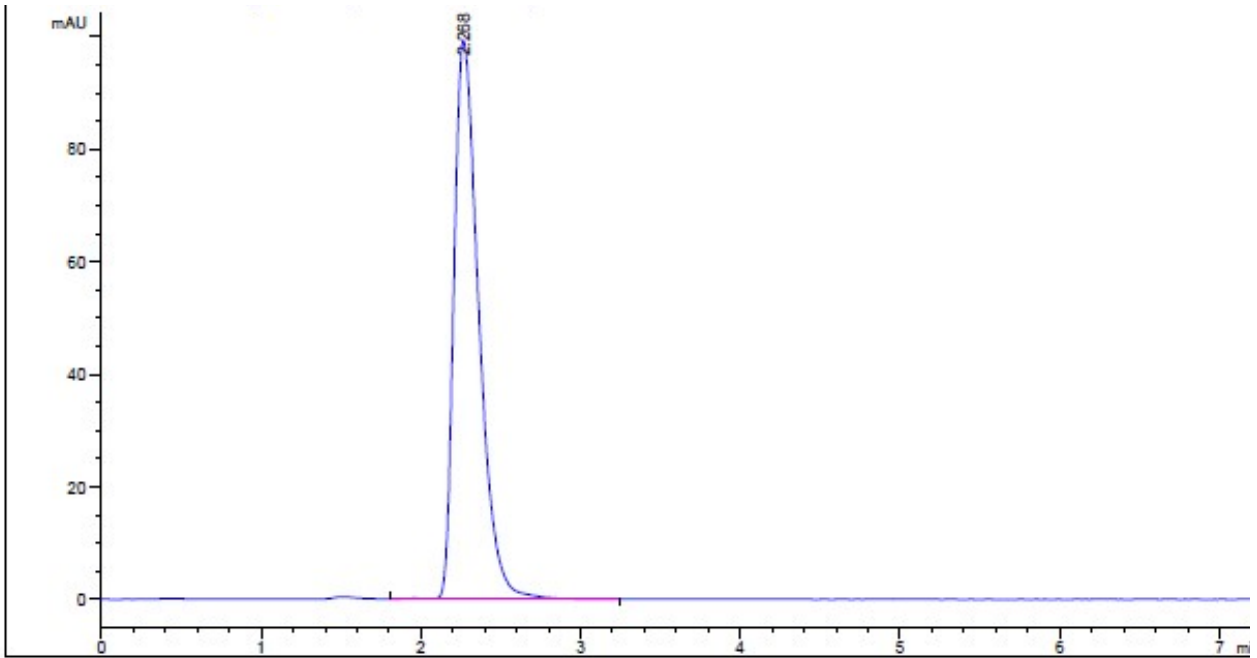

=====  
Area Percent Report  
=====

Sorted By : Signal  
Multiplier : 1.0000  
Dilution : 1.0000  
Sample Amount: : 1.270000000e-2 [ng/ul] (not used in calc.)  
Use Multiplier & Dilution Factor with ISTDs

Signal 1: VWD1 A, Wavelength=363 nm

| Peak # | RetTime [min] | Type | Width [min] | Area [mAU*s] | Height [mAU] | Area %   |
|--------|---------------|------|-------------|--------------|--------------|----------|
| 1      | 2.268         | VB R | 0.1651      | 1070.16028   | 99.25910     | 100.0000 |

# HPLC Chromatogram of 5f

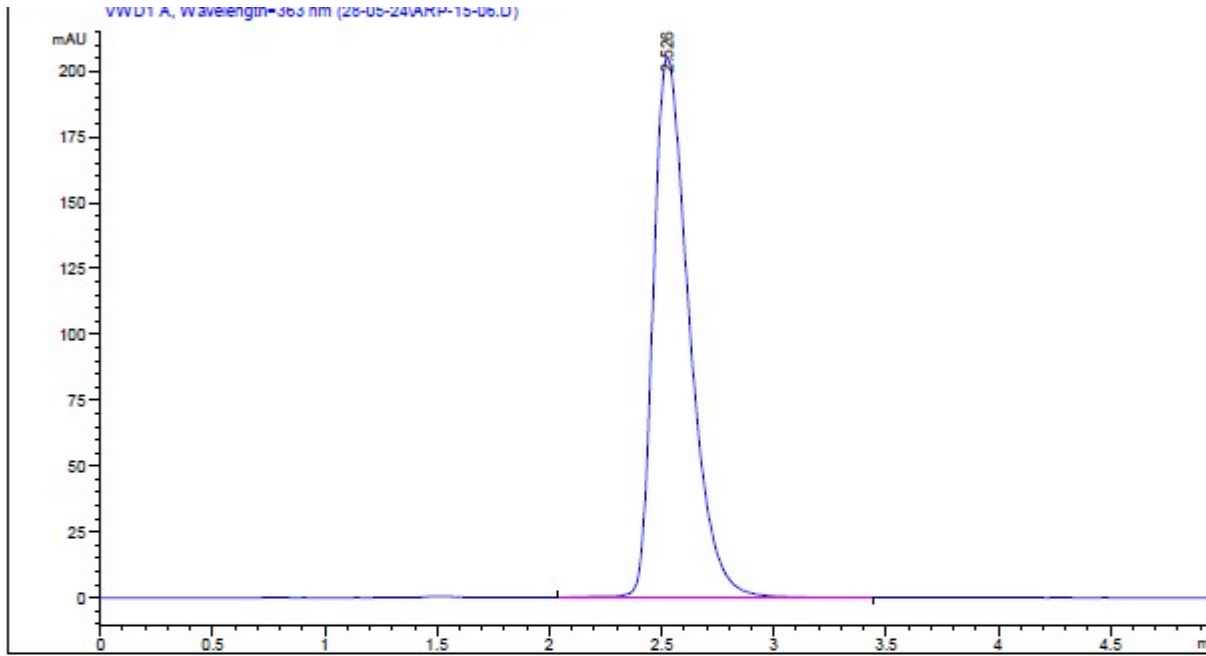

=====  
Area Percent Report  
=====

Sorted By : Signal  
Multiplier : 1.0000  
Dilution : 1.0000  
Sample Amount: : 8.200000000e-3 [ng/ul] (not used in calc.)  
Use Multiplier & Dilution Factor with ISTDs

Signal 1: VWD1 A, Wavelength=363 nm

| Peak # | RetTime [min] | Type | Width [min] | Area [mAU*s] | Height [mAU] | Area %   |
|--------|---------------|------|-------------|--------------|--------------|----------|
| 1      | 2.526         | BB   | 0.1720      | 2282.26343   | 205.20845    | 100.0000 |

# HPLC Chromatogram of 5g

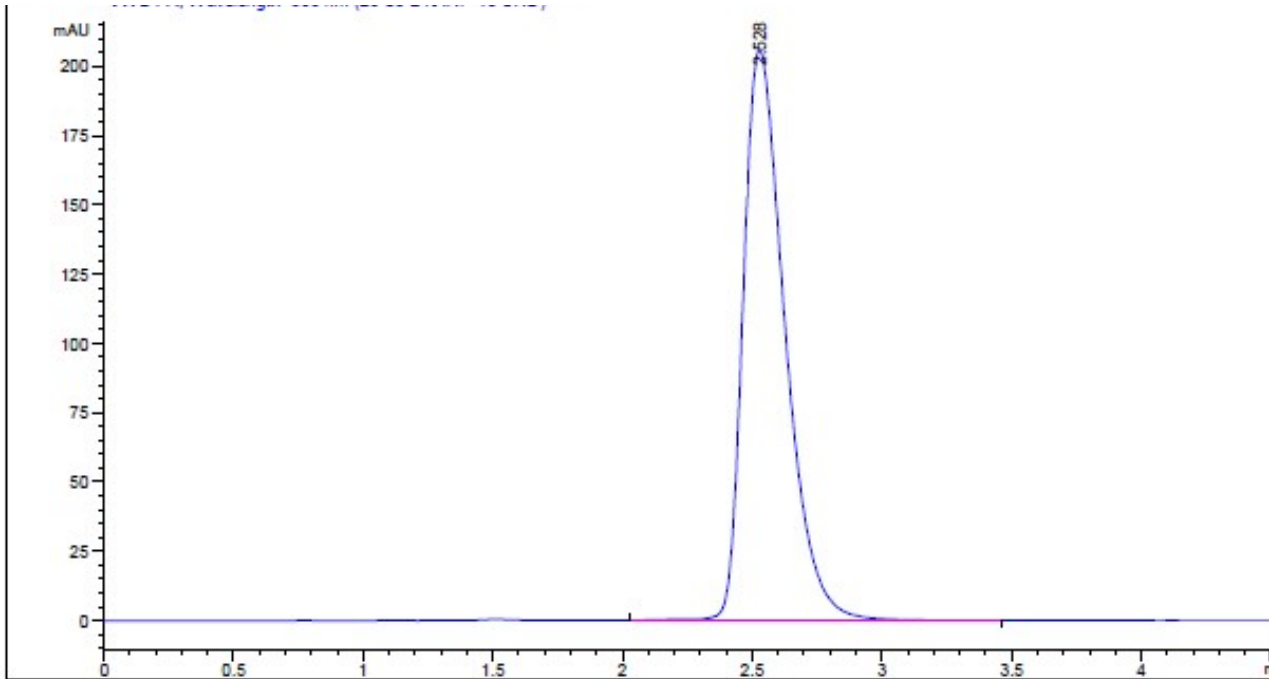

=====  
Area Percent Report  
=====

Sorted By : Signal  
Multiplier : 1.0000  
Dilution : 1.0000  
Sample Amount: : 1.110000000e-2 [ng/ul] (not used in calc.)  
Use Multiplier & Dilution Factor with ISTDs

Signal 1: VWD1 A, Wavelength=363 nm

| Peak # | RetTime [min] | Type | Width [min] | Area [mAU*s] | Height [mAU] | Area %   |
|--------|---------------|------|-------------|--------------|--------------|----------|
| 1      | 2.528         | BB   | 0.1710      | 2296.52808   | 205.73788    | 100.0000 |

# HPLC Chromatogram of 5h

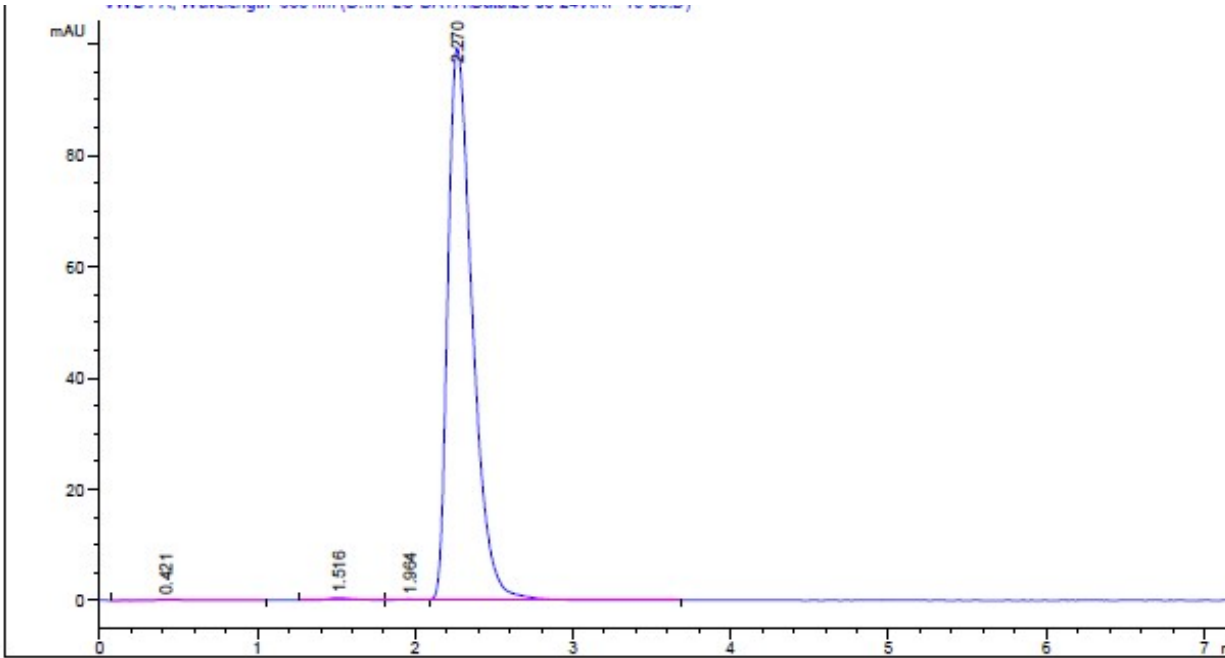

=====  
Area Percent Report  
=====

Sorted By : Signal  
Calib. Data Modified : Saturday, October 29, 2022 12:16:02 PM  
Multiplier : 1.0000  
Dilution : 1.0000  
Sample Amount : 1.270000000e-2 [ng/ul] (not used in calc.)  
Use Multiplier & Dilution Factor with ISTDs

Signal 1: VWD1 A, Wavelength=363 nm

| Peak # | RetTime [min] | Type | Width [min] | Area [mAU*s] | Area %  | Name |
|--------|---------------|------|-------------|--------------|---------|------|
| 1      | 0.421         | BB   | 0.2883      | 2.91738      | 0.2698  | ?    |
| 2      | 1.516         | BV E | 0.1713      | 5.08927      | 0.4707  | ?    |
| 3      | 1.964         | VV E | 0.1738      | 2.01790      | 0.1866  | ?    |
| 4      | 2.270         | VB R | 0.1670      | 1071.29163   | 99.0729 | ?    |

# HPLC Chromatogram of 5i

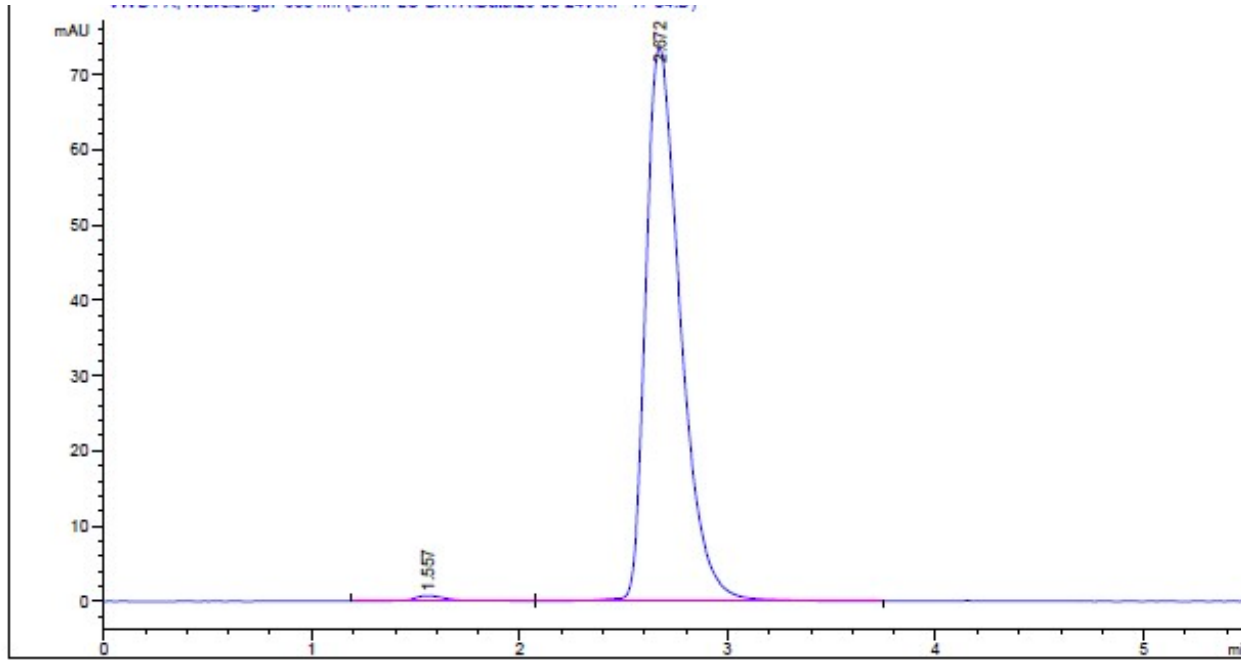

=====  
Area Percent Report  
=====

Sorted By : Signal  
Calib. Data Modified : Saturday, October 29, 2022 12:16:02 PM  
Multiplier : 1.0000  
Dilution : 1.0000  
Sample Amount: : 7.500000000e-3 [ng/ul] (not used in calc.)  
Use Multiplier & Dilution Factor with ISTDs

Signal 1: VWD1 A, Wavelength=363 nm

| Peak # | RetTime [min] | Type | Width [min] | Area [mAU*s] | Area %  | Name |
|--------|---------------|------|-------------|--------------|---------|------|
| 1      | 1.557         | BB   | 0.1602      | 7.64533      | 0.8922  | ?    |
| 2      | 2.672         | BB   | 0.1772      | 849.25317    | 99.1078 | ?    |

# HPLC Chromatogram of 5j

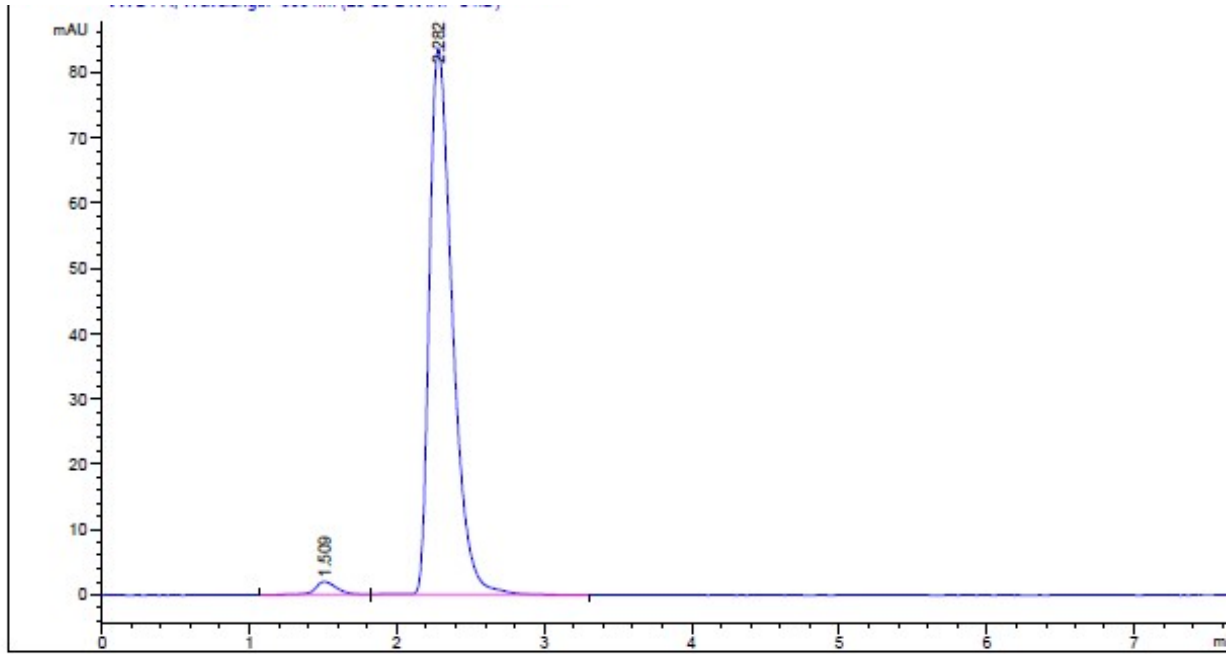

=====  
Area Percent Report  
=====

Sorted By : Signal  
Multiplier : 1.0000  
Dilution : 1.0000  
Use Multiplier & Dilution Factor with ISTDs

Signal 1: VWD1 A, Wavelength=363 nm

| Peak # | RetTime [min] | Type | Width [min] | Area [mAU*s] | Height [mAU] | Area %  |
|--------|---------------|------|-------------|--------------|--------------|---------|
| 1      | 1.509         | BB   | 0.1558      | 20.22128     | 1.95225      | 2.1847  |
| 2      | 2.282         | VB R | 0.1670      | 905.36340    | 83.68923     | 97.8153 |



# HPLC Chromatogram of 5k

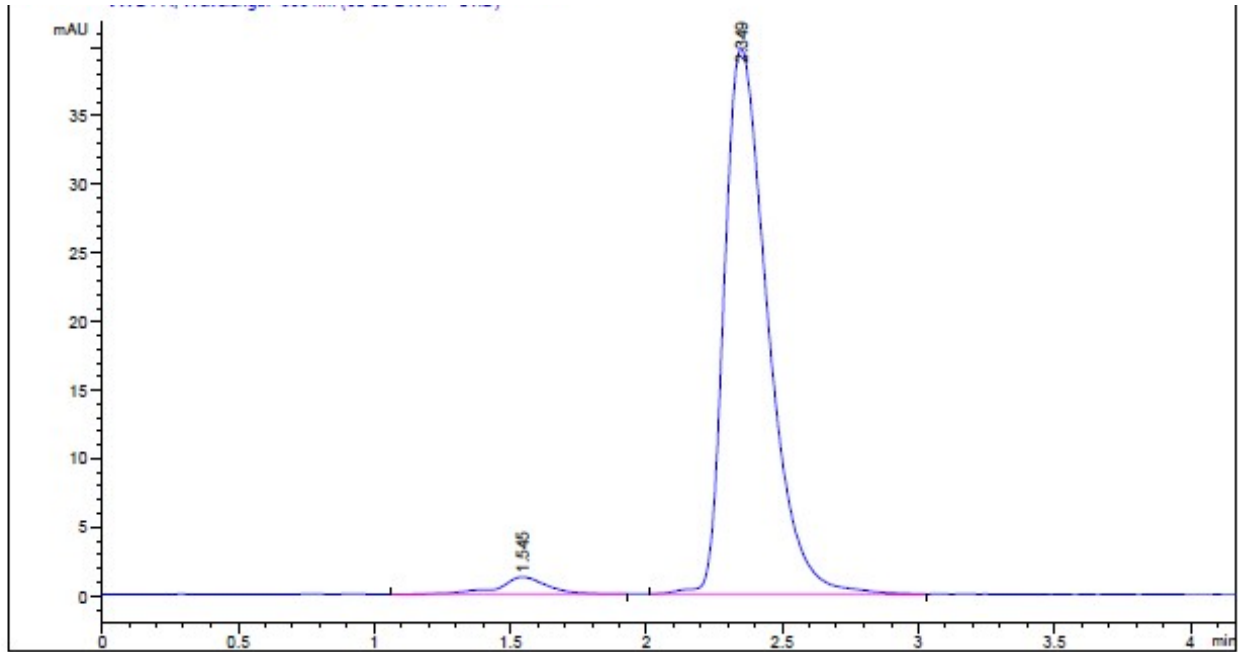

=====  
Area Percent Report  
=====

Sorted By : Signal  
Multiplier : 1.0000  
Dilution : 1.0000  
Use Multiplier & Dilution Factor with ISTDs

Signal 1: VWD1 A, Wavelength=363 nm

| Peak # | RetTime [min] | Type | Width [min] | Area [mAU*s] | Height [mAU] | Area %  |
|--------|---------------|------|-------------|--------------|--------------|---------|
| 1      | 1.545         | BB   | 0.1776      | 15.43735     | 1.23704      | 3.3910  |
| 2      | 2.349         | BB   | 0.1698      | 439.80975    | 39.76856     | 96.6090 |

# HPLC Chromatogram of 5I

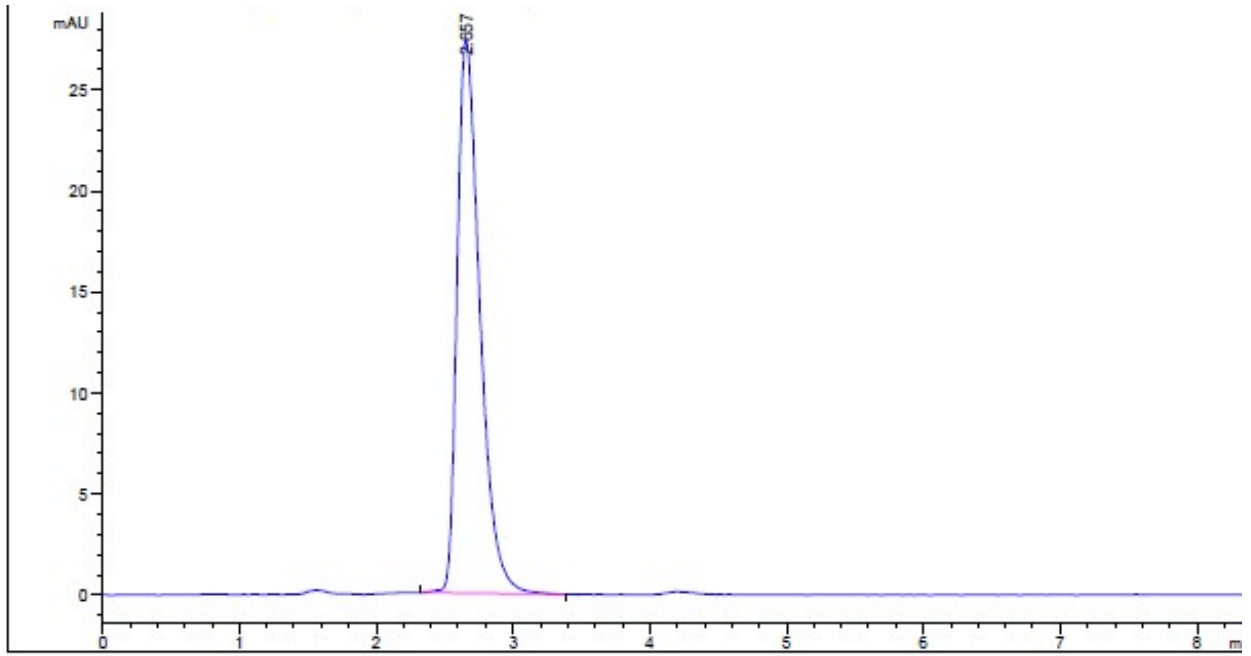

=====  
Area Percent Report  
=====

Sorted By : Signal  
Multiplier : 1.0000  
Dilution : 1.0000  
Sample Amount: : 1.020000000e-2 [ng/ul] (not used in calc.)  
Use Multiplier & Dilution Factor with ISTDs

Signal 1: VWD1 A, Wavelength=363 nm

| Peak # | RetTime [min] | Type | Width [min] | Area [mAU*s] | Height [mAU] | Area %   |
|--------|---------------|------|-------------|--------------|--------------|----------|
| 1      | 2.657         | BB   | 0.1779      | 317.86496    | 27.34015     | 100.0000 |

# HPLC Chromatogram of 5m

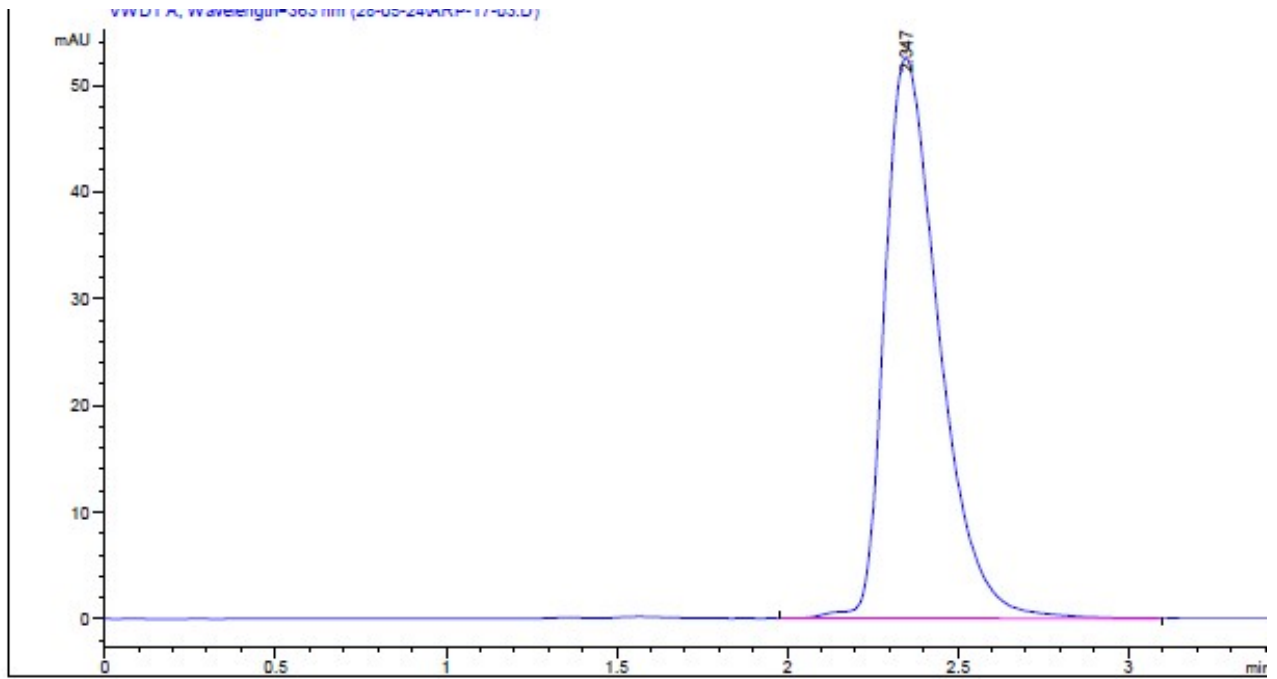

=====  
Area Percent Report  
=====

Sorted By : Signal  
Multiplier : 1.0000  
Dilution : 1.0000  
Sample Amount: : 1.200000000e-2 [ng/ul] (not used in calc.)  
Use Multiplier & Dilution Factor with ISTDs

Signal 1: VWD1 A, Wavelength=363 nm

| Peak # | RetTime [min] | Type | Width [min] | Area [mAU*s] | Height [mAU] | Area %   |
|--------|---------------|------|-------------|--------------|--------------|----------|
| 1      | 2.347         | BB   | 0.1702      | 582.60956    | 52.51455     | 100.0000 |

# HPLC Chromatogram of 5n

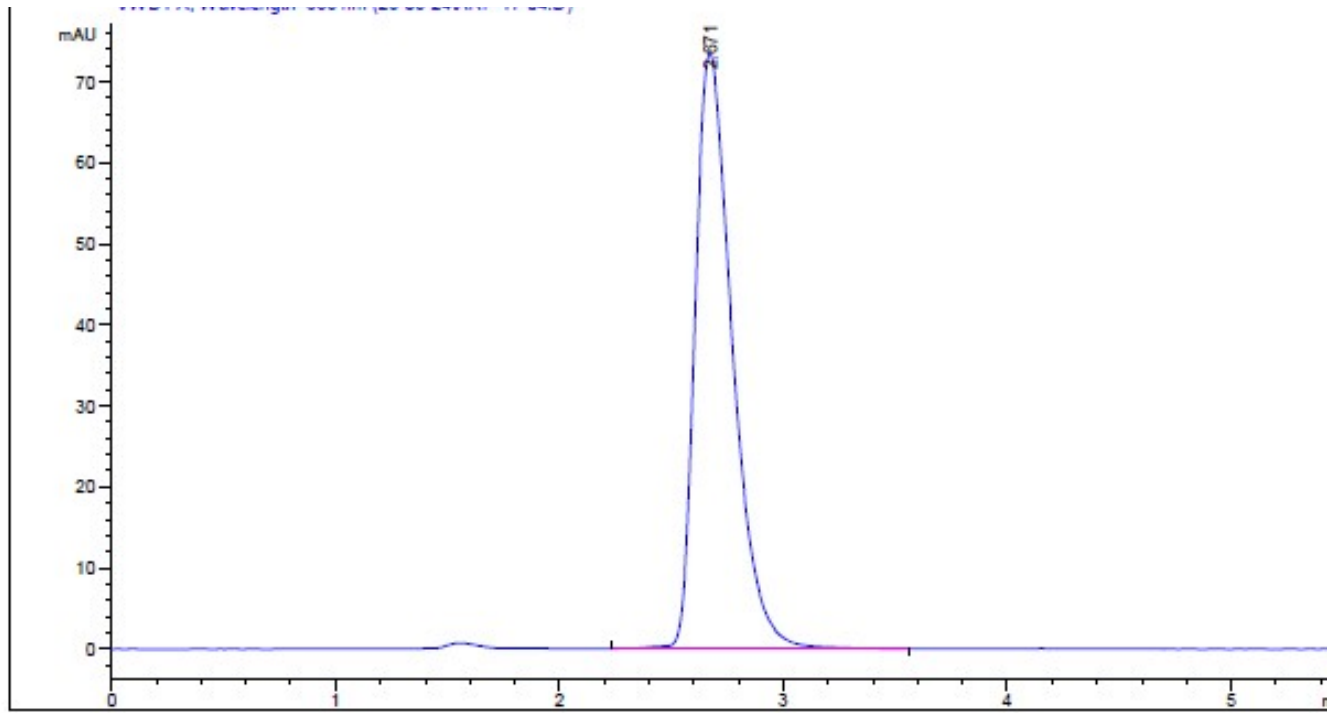

=====  
Area Percent Report  
=====

Sorted By : Signal  
Multiplier : 1.0000  
Dilution : 1.0000  
Sample Amount: : 7.500000000e-3 [ng/ul] (not used in calc.)  
Use Multiplier & Dilution Factor with ISTDs

Signal 1: VWD1 A, Wavelength=363 nm

| Peak # | RetTime [min] | Type | Width [min] | Area [mAU*s] | Height [mAU] | Area %   |
|--------|---------------|------|-------------|--------------|--------------|----------|
| 1      | 2.671         | BB   | 0.1770      | 848.03119    | 73.42719     | 100.0000 |

# HPLC Chromatogram of 5o

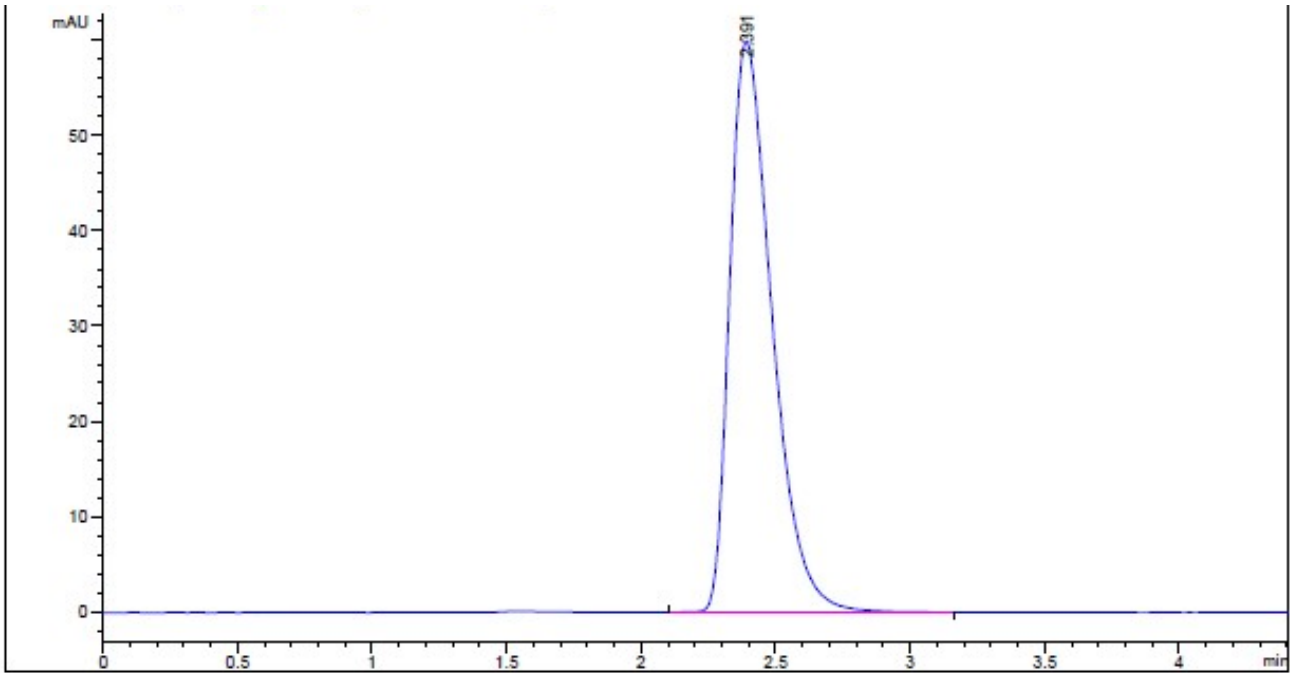

=====  
Area Percent Report  
=====

Sorted By : Signal  
Multiplier : 1.0000  
Dilution : 1.0000  
Sample Amount: : 1.550000000e-2 [ng/ul] (not used in calc.)  
Use Multiplier & Dilution Factor with ISTDs

Signal 1: VWD1 A, Wavelength=363 nm

| Peak # | RetTime [min] | Type | Width [min] | Area [mAU*s] | Height [mAU] | Area %   |
|--------|---------------|------|-------------|--------------|--------------|----------|
| 1      | 2.391         | BB   | 0.1684      | 654.65875    | 59.83065     | 100.0000 |

# HPLC Chromatogram of 5p

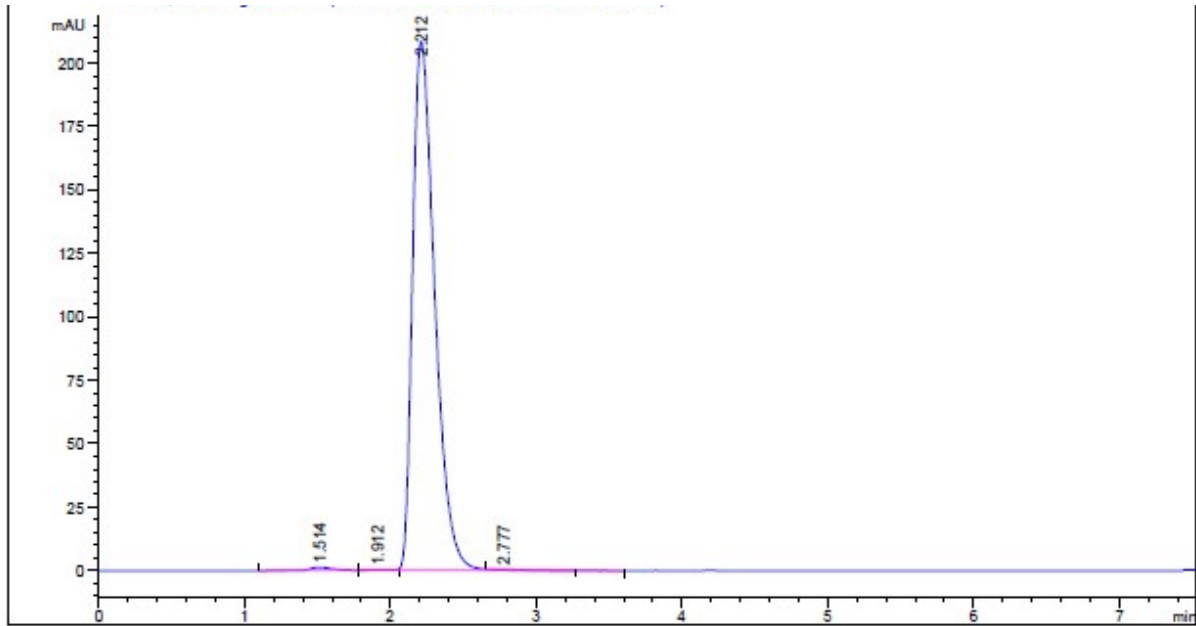

=====  
Area Percent Report  
=====

Sorted By : Signal  
Calib. Data Modified : Saturday, October 29, 2022 12:16:02 PM  
Multiplier : 1.0000  
Dilution : 1.0000  
Sample Amount : 9.300000000e-3 [ng/ul] (not used in calc.)  
Use Multiplier & Dilution Factor with ISTDs

Signal 1: VWD1 A, Wavelength=363 nm

| Peak # | RetTime [min] | Type | Width [min] | Area [mAU*s] | Area %  | Name |
|--------|---------------|------|-------------|--------------|---------|------|
| 1      | 1.514         | VB R | 0.1598      | 13.14060     | 0.5927  | ?    |
| 2      | 1.912         | BV E | 0.1513      | 2.56966      | 0.1159  | ?    |
| 3      | 2.212         | VW R | 0.1639      | 2197.85620   | 99.1341 | ?    |
| 4      | 2.777         | VB E | 0.1909      | 3.48621      | 0.1572  | ?    |

# HPLC Chromatogram of 5q

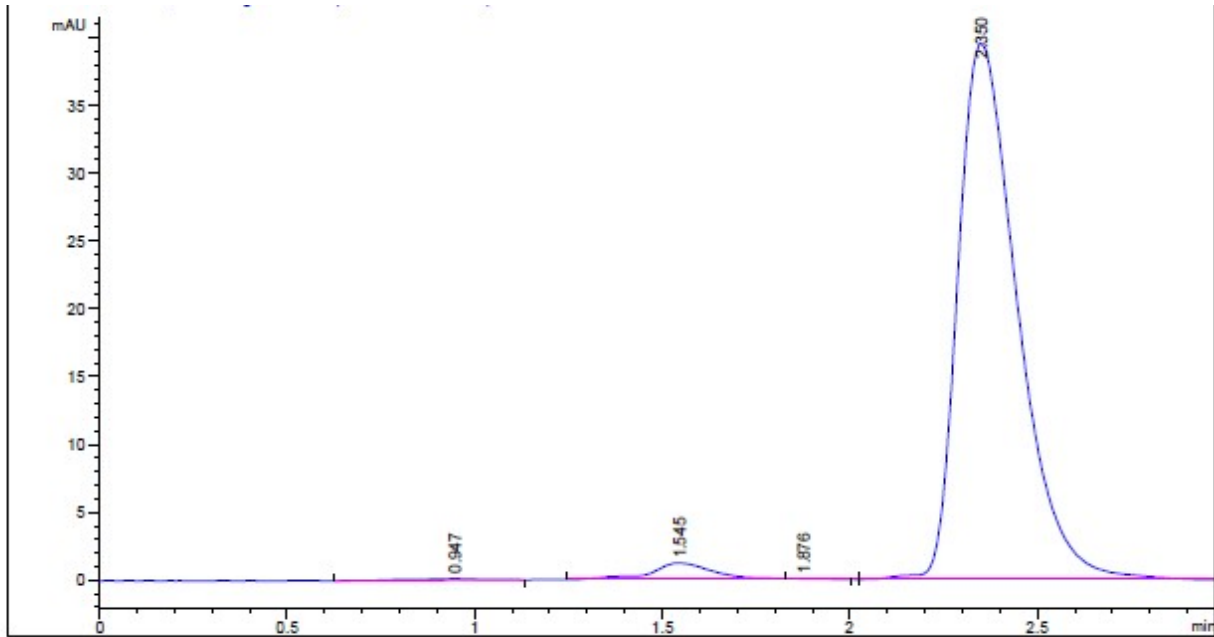

=====  
 Area Percent Report  
 =====

Sorted By : Signal  
 Multiplier : 1.0000  
 Dilution : 1.0000  
 Use Multiplier & Dilution Factor with ISTDs

Signal 1: VWD1 A, Wavelength=363 nm

| Peak # | RetTime [min] | Type | Width [min] | Area [mAU*s] | Height [mAU] | Area %  |
|--------|---------------|------|-------------|--------------|--------------|---------|
| 1      | 0.947         | BB   | 0.1683      | 1.46076      | 1.09802e-1   | 0.3241  |
| 2      | 1.545         | BV R | 0.1740      | 14.21573     | 1.20553      | 3.1536  |
| 3      | 1.876         | VB E | 0.0895      | 2.31827e-1   | 3.54070e-2   | 0.0514  |
| 4      | 2.350         | BBA  | 0.1692      | 434.87039    | 39.51648     | 96.4709 |

# HPLC Chromatogram of 5r

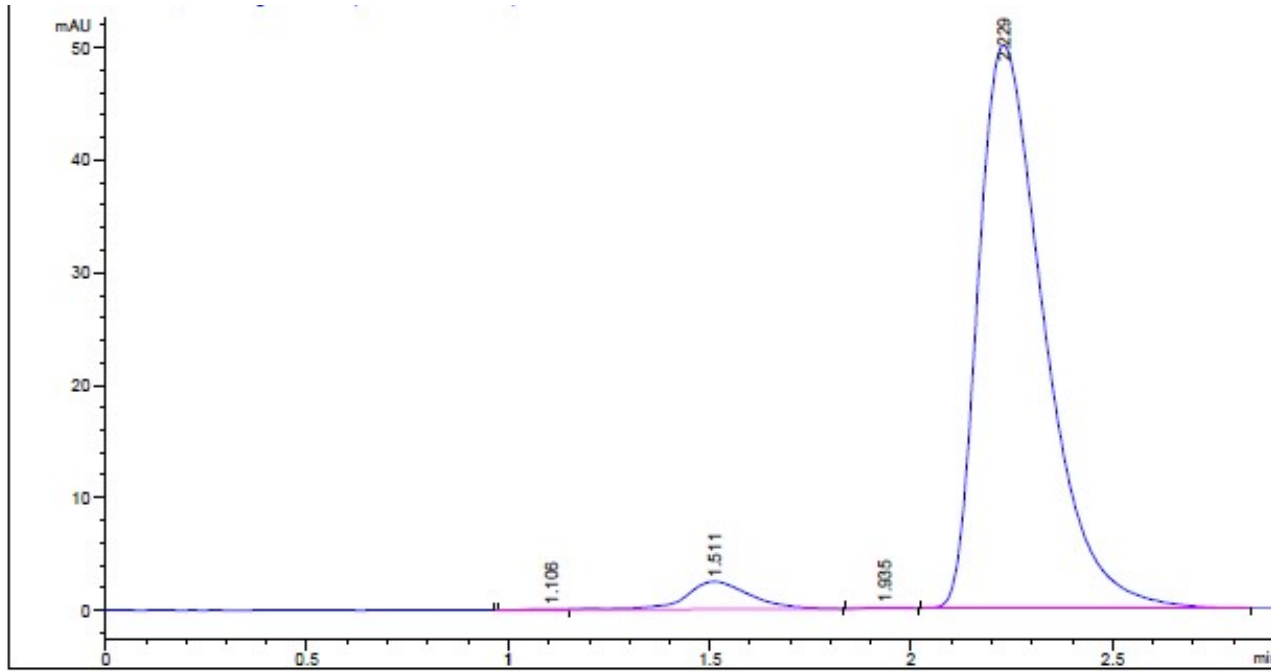

=====  
Area Percent Report  
=====

Sorted By : Signal  
Multiplier : 1.0000  
Dilution : 1.0000  
Use Multiplier & Dilution Factor with ISTDs

Signal 1: VWD1 A, Wavelength=363 nm

| Peak # | RetTime [min] | Type | Width [min] | Area [mAU*s] | Height [mAU] | Area %  |
|--------|---------------|------|-------------|--------------|--------------|---------|
| 1      | 1.106         | BV E | 0.0676      | 2.11958e-1   | 4.19920e-2   | 0.0356  |
| 2      | 1.511         | VB R | 0.1709      | 27.47318     | 2.43577      | 4.6107  |
| 3      | 1.935         | BB   | 0.0912      | 3.57638e-1   | 5.05888e-2   | 0.0600  |
| 4      | 2.229         | BB   | 0.1746      | 567.81067    | 50.03132     | 95.2937 |



# HPLC Chromatogram of 5s

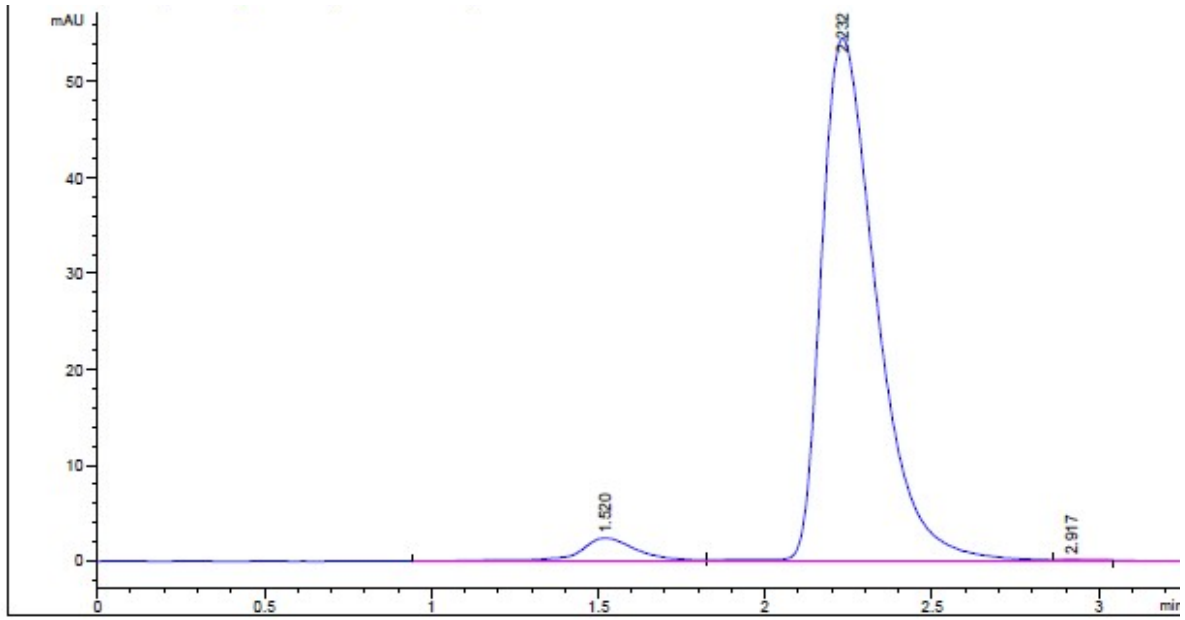

=====  
Area Percent Report  
=====

Sorted By : Signal  
Multiplier : 1.0000  
Dilution : 1.0000  
Use Multiplier & Dilution Factor with ISTDs

Signal 1: VWD1 A, Wavelength=363 nm

| Peak # | RetTime [min] | Type | Width [min] | Area [mAU*s] | Height [mAU] | Area %  |
|--------|---------------|------|-------------|--------------|--------------|---------|
| 1      | 1.520         | BV   | 0.1839      | 29.44141     | 2.39994      | 4.4887  |
| 2      | 2.232         | VV R | 0.1762      | 626.23914    | 54.54214     | 95.4779 |
| 3      | 2.917         | VBAE | 0.0833      | 2.18824e-1   | 3.49065e-2   | 0.0334  |

HPLC Chromatogram of 5t

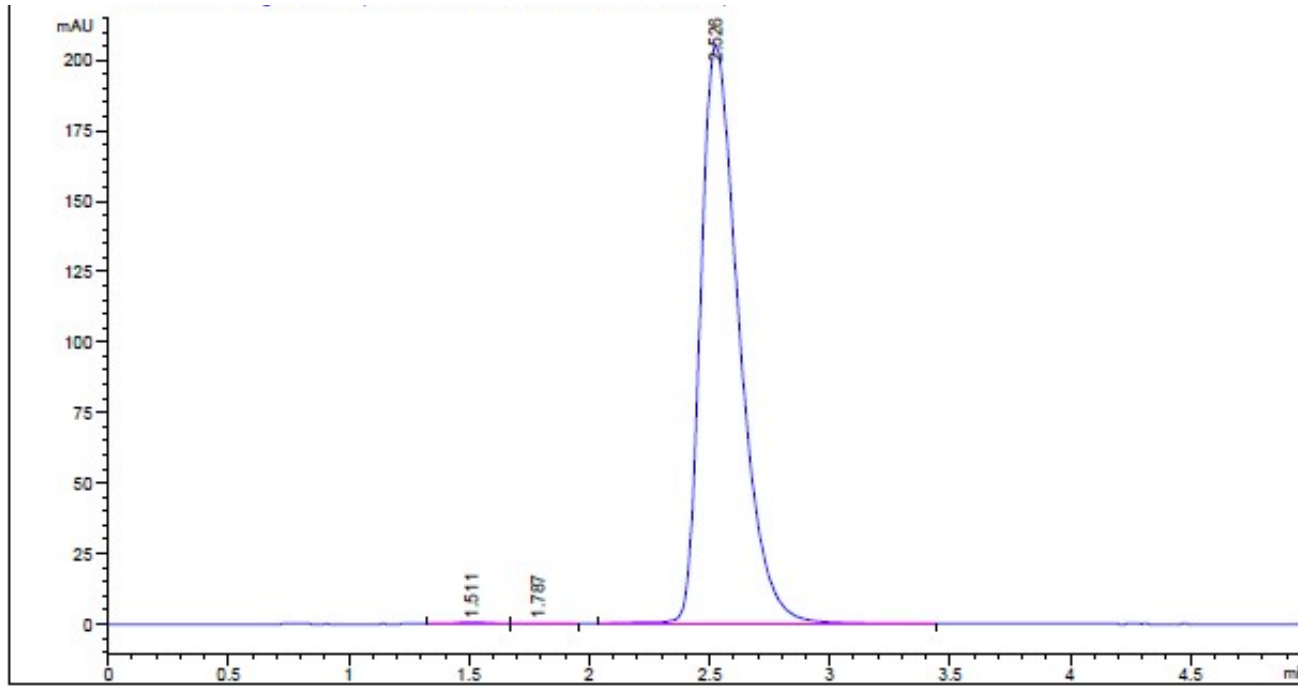

=====  
 Area Percent Report  
 =====

Sorted By : Signal  
 Calib. Data Modified : Saturday, October 29, 2022 12:16:02 PM  
 Multiplier : 1.0000  
 Dilution : 1.0000  
 Sample Amount: : 8.200000000e-3 [ng/ul] (not used in calc.)  
 Use Multiplier & Dilution Factor with ISTDs

Signal 1: VWD1 A, Wavelength=363 nm

| Peak # | RetTime [min] | Type | Width [min] | Area [mAU*s] | Area %  | Name |
|--------|---------------|------|-------------|--------------|---------|------|
| 1      | 1.511         | BV   | 0.1298      | 4.07202      | 0.1780  | ?    |
| 2      | 1.787         | VB   | 0.1132      | 7.68598e-1   | 0.0336  | ?    |
| 3      | 2.526         | BB   | 0.1720      | 2282.26343   | 99.7884 | ?    |

# HPLC Chromatogram of 6a

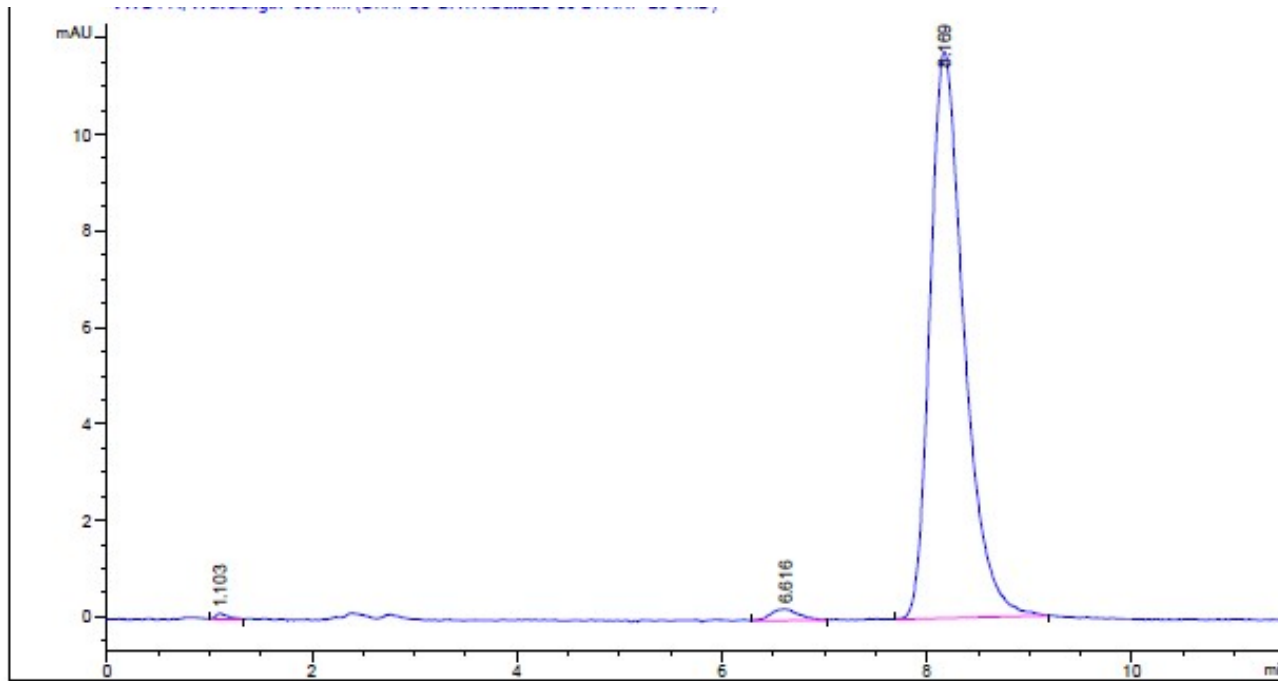

=====  
Area Percent Report  
=====

Sorted By : Signal  
Calib. Data Modified : Saturday, October 29, 2022 12:16:02 PM  
Multiplier : 1.0000  
Dilution : 1.0000  
Sample Amount: : 1.040000000e-2 [ng/ul] (not used in calc.)  
Use Multiplier & Dilution Factor with ISTDs

Signal 1: VWD1 A, Wavelength=363 nm

| Peak # | RetTime [min] | Type | Width [min] | Area [mAU*s] | Area %  | Name |
|--------|---------------|------|-------------|--------------|---------|------|
| 1      | 1.103         | BB   | 0.1117      | 9.09075e-1   | 0.3291  | ?    |
| 2      | 6.616         | BB   | 0.2333      | 4.40424      | 1.5946  | ?    |
| 3      | 8.169         | BB   | 0.3508      | 270.88400    | 98.0763 | ?    |

# HPLC Chromatogram of 6b

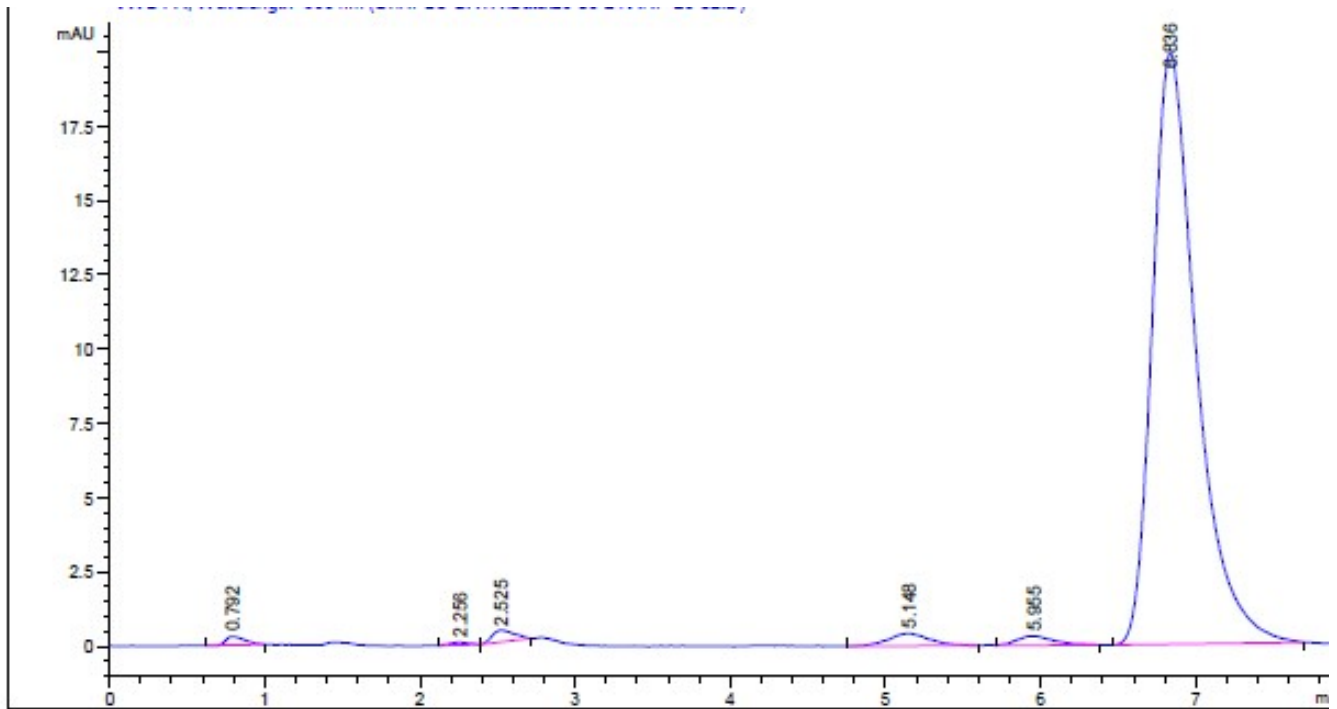

=====  
 Area Percent Report  
 =====

Sorted By : Signal  
 Calib. Data Modified : Saturday, October 29, 2022 12:16:02 PM  
 Multiplier : 1.0000  
 Dilution : 1.0000  
 Sample Amount : 6.900000000e-3 [ng/ul] (not used in calc.)  
 Use Multiplier & Dilution Factor with ISTDs

Signal 1: VWD1 A, Wavelength=363 nm

| Peak # | RetTime [min] | Type | Width [min] | Area [mAU*s] | Area %  | Name |
|--------|---------------|------|-------------|--------------|---------|------|
| 1      | 0.792         | BB   | 0.1295      | 2.56449      | 0.6211  | ?    |
| 2      | 2.256         | BB   | 0.1182      | 8.31655e-1   | 0.2014  | ?    |
| 3      | 2.525         | BB   | 0.1408      | 3.83381      | 0.9285  | ?    |
| 4      | 5.148         | BB   | 0.2439      | 7.96755      | 1.9296  | ?    |
| 5      | 5.955         | BB   | 0.2071      | 5.27597      | 1.2777  | ?    |
| 6      | 6.836         | BB   | 0.2969      | 392.44431    | 95.0418 | ?    |

# HPLC Chromatogram of 6c

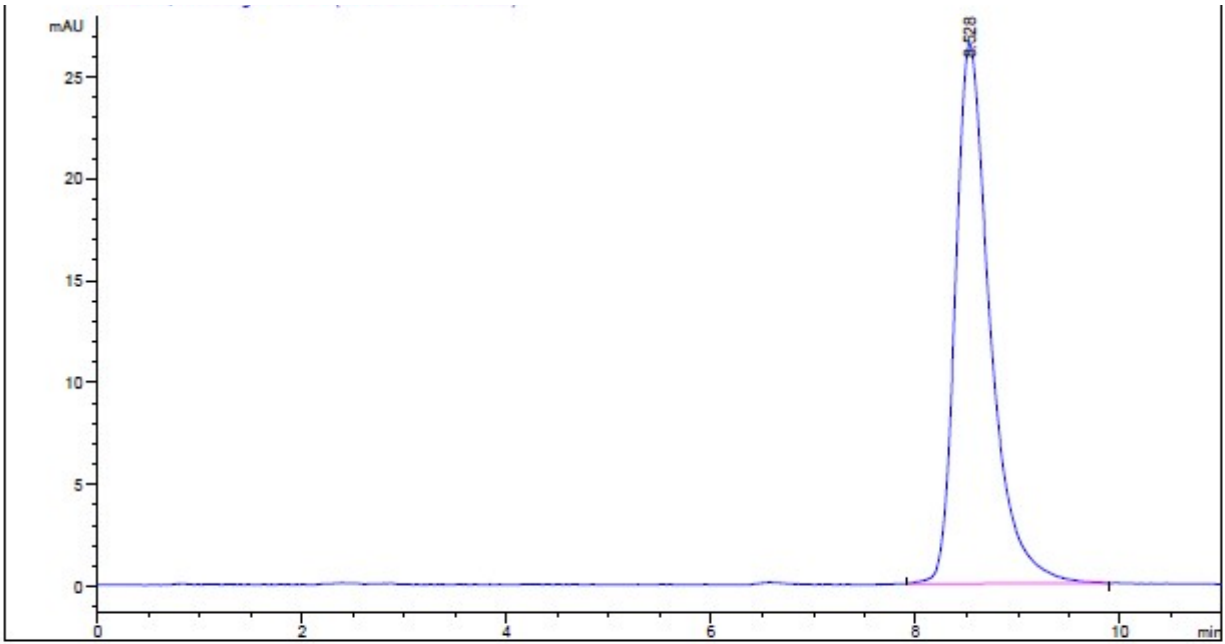

=====  
Area Percent Report  
=====

Sorted By : Signal  
Multiplier : 1.0000  
Dilution : 1.0000  
Sample Amount: : 9.700000000e-3 [ng/ul] (not used in calc.)  
Use Multiplier & Dilution Factor with ISTDs

Signal 1: VWD1 A, Wavelength=363 nm

| Peak # | RetTime [min] | Type | Width [min] | Area [mAU*s] | Height [mAU] | Area %   |
|--------|---------------|------|-------------|--------------|--------------|----------|
| 1      | 8.528         | BB   | 0.3523      | 624.71893    | 26.49245     | 100.0000 |

# HPLC Chromatogram of 6d

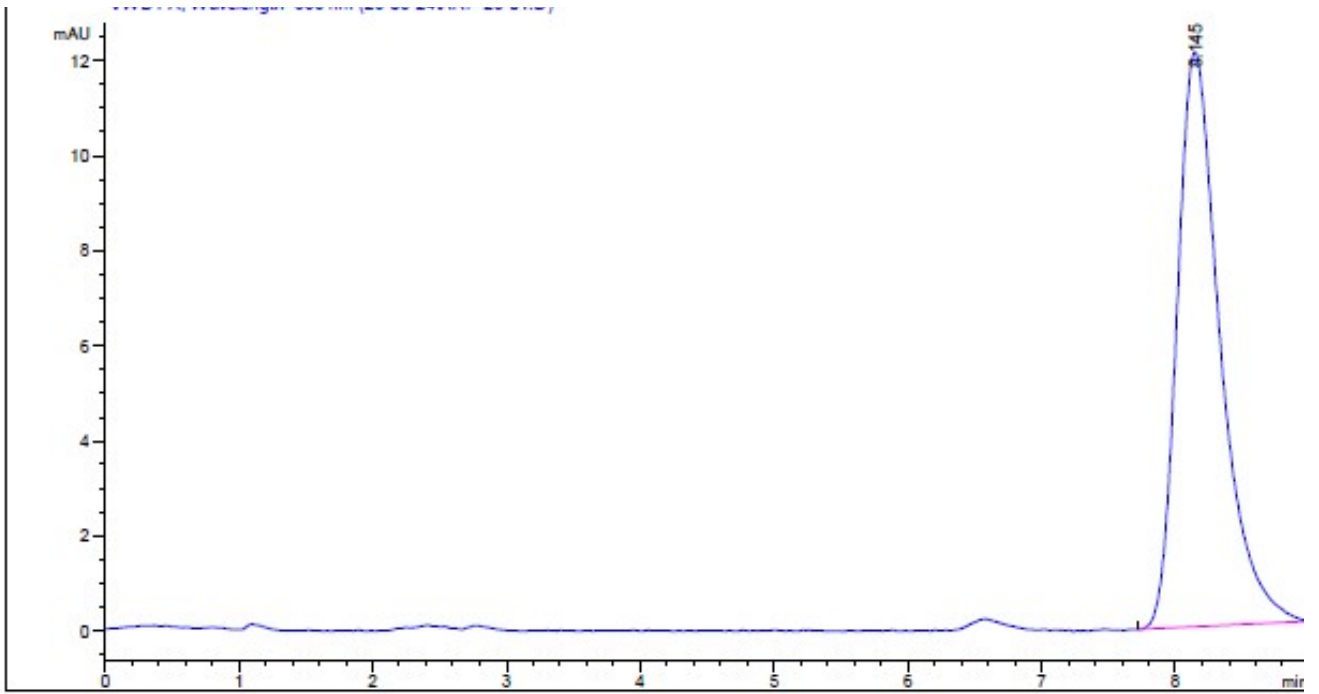

=====  
Area Percent Report  
=====

Sorted By : Signal  
Multiplier : 1.0000  
Dilution : 1.0000  
Sample Amount: : 1.040000000e-2 [ng/ul] (not used in calc.)  
Use Multiplier & Dilution Factor with ISTDs

Signal 1: VWD1 A, Wavelength=363 nm

| Peak # | RetTime [min] | Type | Width [min] | Area [mAU*s] | Height [mAU] | Area %   |
|--------|---------------|------|-------------|--------------|--------------|----------|
| 1      | 8.145         | BBA  | 0.3349      | 269.95401    | 12.08498     | 100.0000 |

# HPLC Chromatogram of 6e

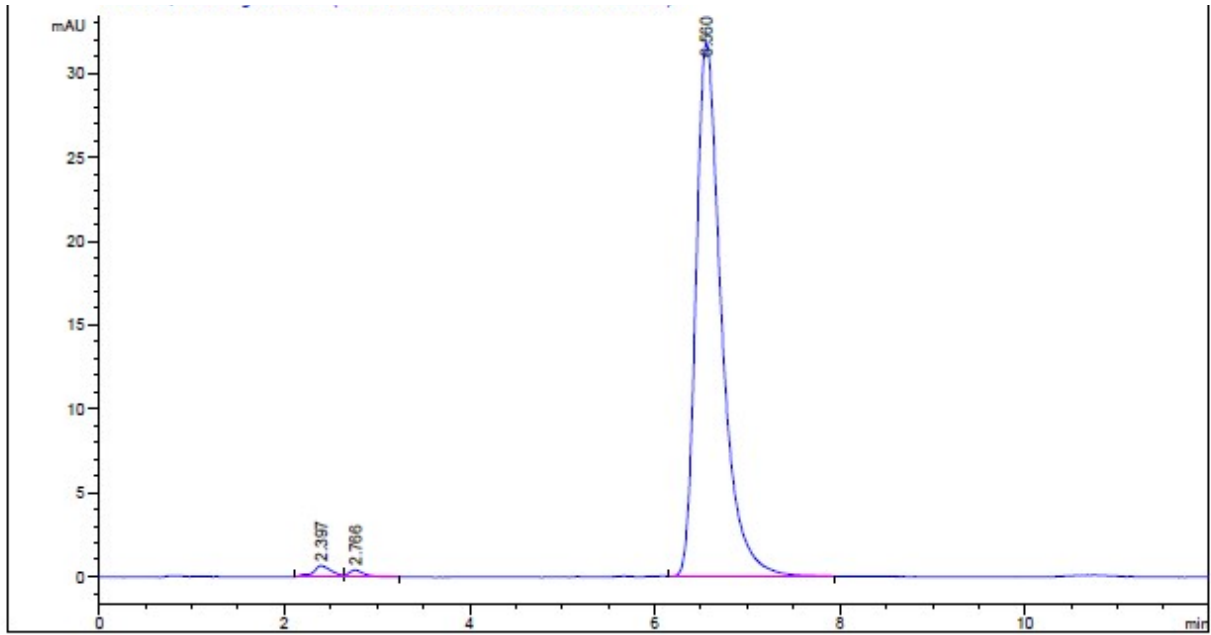

=====  
Area Percent Report  
=====

Sorted By : Signal  
Calib. Data Modified : Saturday, October 29, 2022 12:16:02 PM  
Multiplier : 1.0000  
Dilution : 1.0000  
Sample Amount : 1.840000000e-2 [ng/ul] (not used in calc.)  
Use Multiplier & Dilution Factor with ISTDs

Signal 1: VWD1 A, Wavelength=363 nm

| Peak # | RetTime [min] | Type | Width [min] | Area [mAU*s] | Area %  | Name |
|--------|---------------|------|-------------|--------------|---------|------|
| 1      | 2.397         | BV   | 0.2031      | 9.32769      | 1.4929  | ?    |
| 2      | 2.766         | VB   | 0.1856      | 4.80218      | 0.7686  | ?    |
| 3      | 6.560         | BB   | 0.2908      | 610.66272    | 97.7385 | ?    |

# HPLC Chromatogram of 6f

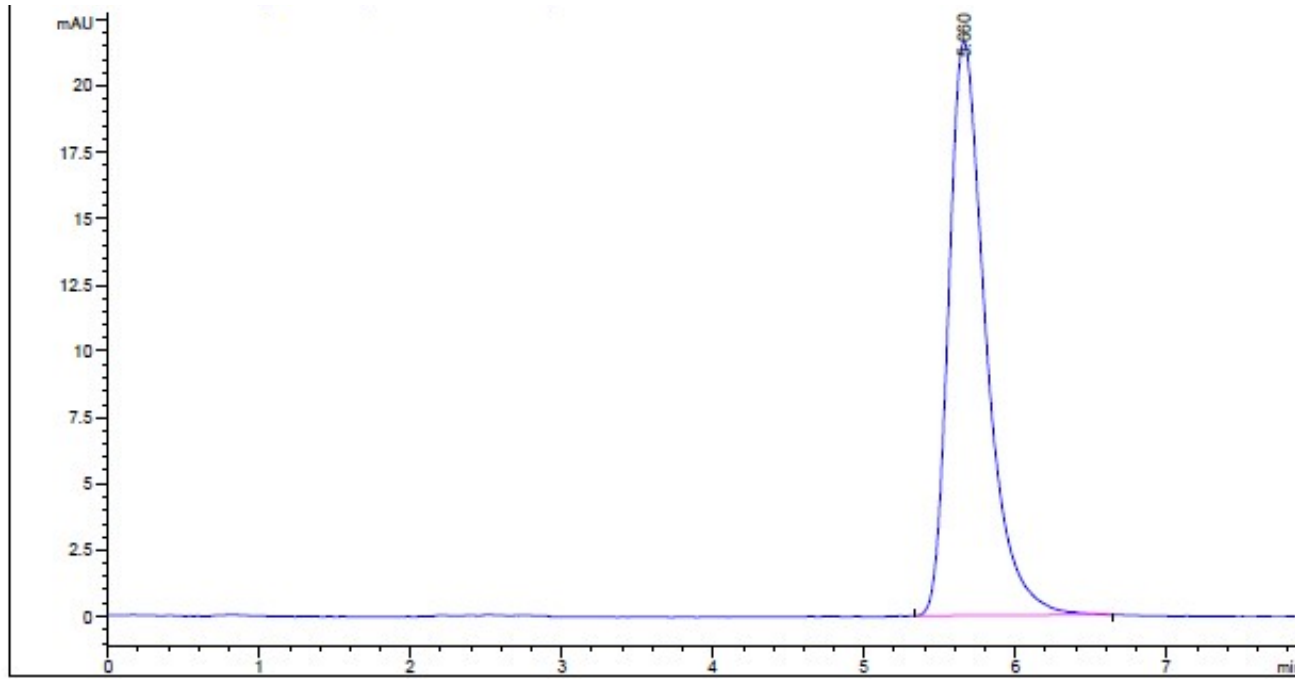

=====  
Area Percent Report  
=====

Sorted By : Signal  
Multiplier : 1.0000  
Dilution : 1.0000  
Sample Amount: : 1.730000000e-2 [ng/ul] (not used in calc.)  
Use Multiplier & Dilution Factor with ISTDs

Signal 1: VWD1 A, Wavelength=363 nm

| Peak # | RetTime [min] | Type | Width [min] | Area [mAU*s] | Height [mAU] | Area %   |
|--------|---------------|------|-------------|--------------|--------------|----------|
| 1      | 5.660         | BB   | 0.2591      | 369.89682    | 21.64264     | 100.0000 |



# HPLC Chromatogram of 6g

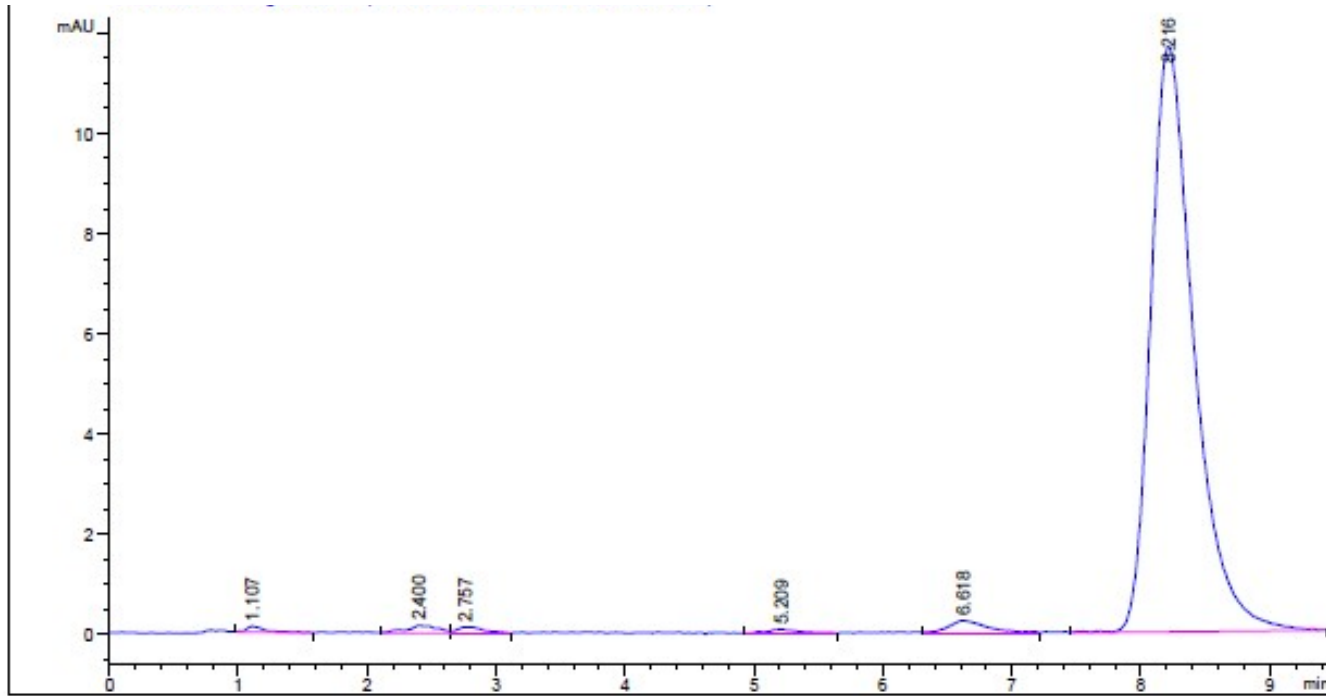

=====  
Area Percent Report  
=====

Sorted By : Signal  
Multiplier : 1.0000  
Dilution : 1.0000  
Use Multiplier & Dilution Factor with ISTDs

Signal 1: VWD1 A, Wavelength=363 nm

| Peak # | RetTime [min] | Type | Width [min] | Area [mAU*s] | Height [mAU] | Area %  |
|--------|---------------|------|-------------|--------------|--------------|---------|
| 1      | 1.107         | BB   | 0.1363      | 1.14370      | 1.12307e-1   | 0.4027  |
| 2      | 2.400         | BV   | 0.2111      | 2.54070      | 1.50790e-1   | 0.8946  |
| 3      | 2.757         | VB   | 0.1867      | 1.71308      | 1.20172e-1   | 0.6032  |
| 4      | 5.209         | BB   | 0.2323      | 1.49381      | 8.22268e-2   | 0.5260  |
| 5      | 6.618         | BB   | 0.2560      | 4.89367      | 2.42263e-1   | 1.7231  |
| 6      | 8.216         | VBA  | 0.3503      | 272.22449    | 11.68885     | 95.8505 |

# HPLC Chromatogram of 6g

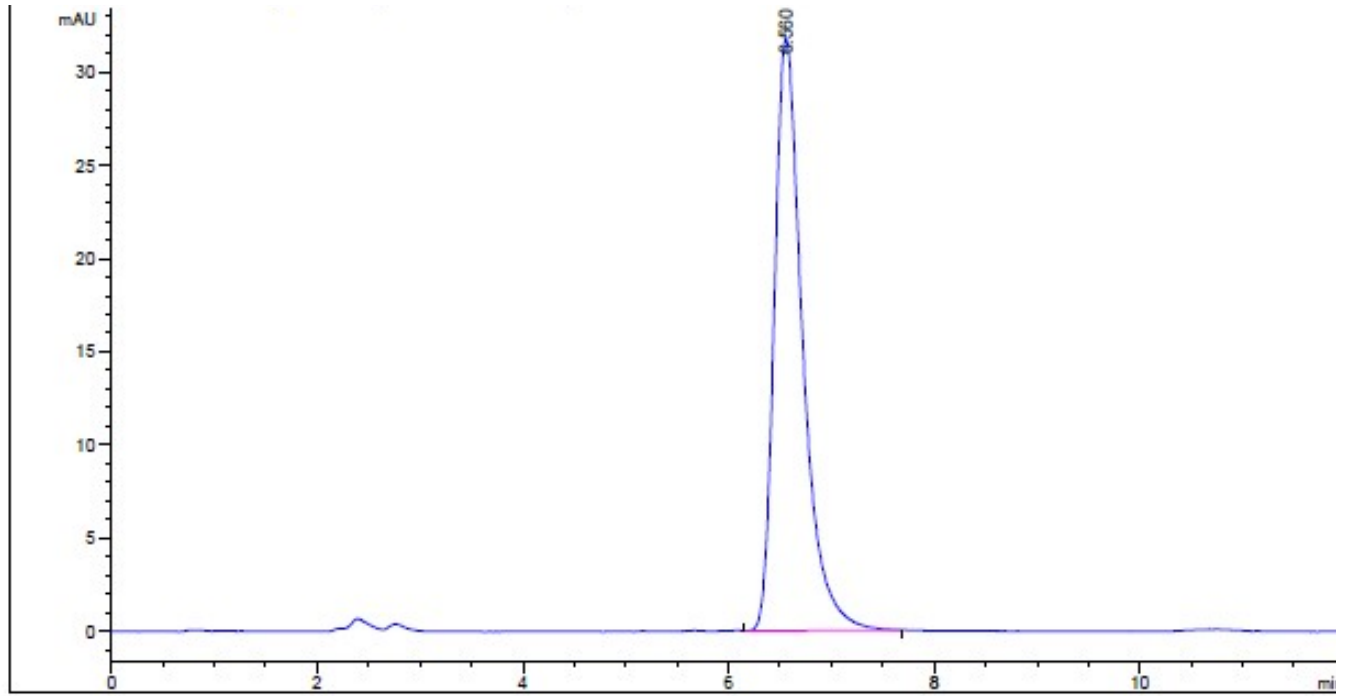

=====  
Area Percent Report  
=====

Sorted By : Signal  
Multiplier : 1.0000  
Dilution : 1.0000  
Sample Amount: : 1.840000000e-2 [ng/ul] (not used in calc.)  
Use Multiplier & Dilution Factor with ISTDs

Signal 1: VWD1 A, Wavelength=363 nm

| Peak # | RetTime [min] | Type | Width [min] | Area [mAU*s] | Height [mAU] | Area %   |
|--------|---------------|------|-------------|--------------|--------------|----------|
| 1      | 6.560         | BB   | 0.2900      | 608.04944    | 31.81315     | 100.0000 |

# HPLC Chromatogram of 6i

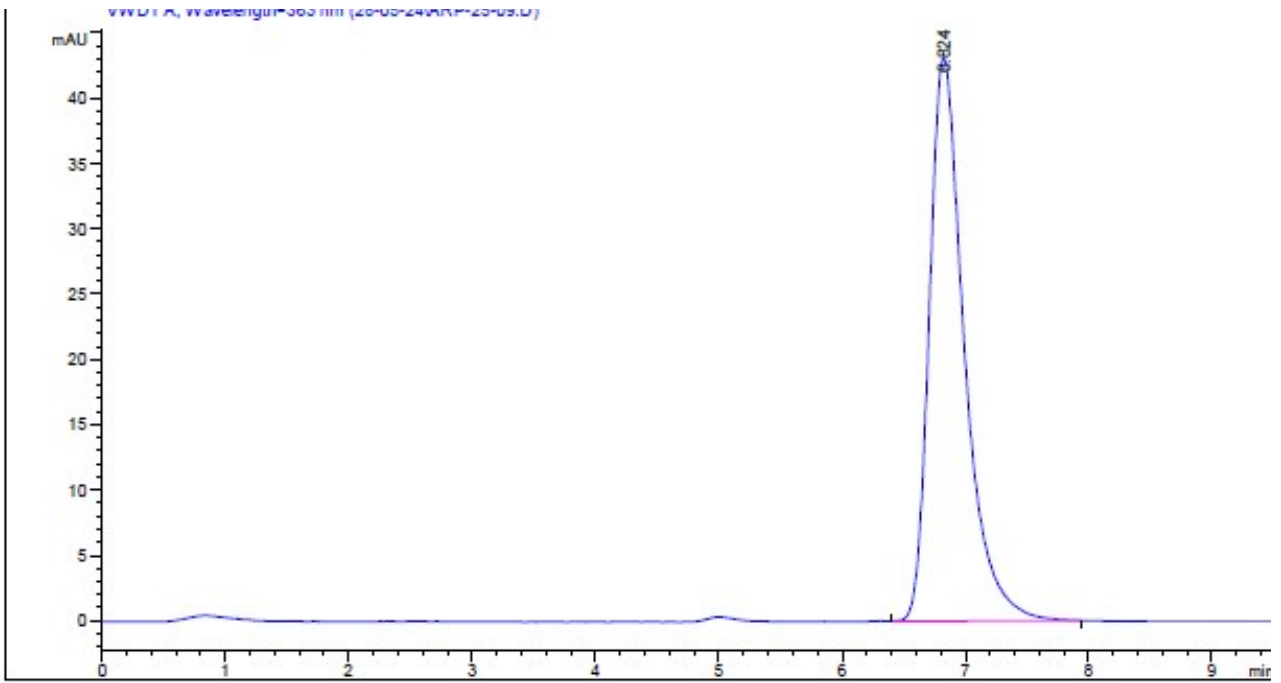

=====  
Area Percent Report  
=====

Sorted By : Signal  
Multiplier : 1.0000  
Dilution : 1.0000  
Sample Amount: : 1.310000000e-2 [ng/ul] (not used in calc.)  
Use Multiplier & Dilution Factor with ISTDs

Signal 1: VWD1 A, Wavelength=363 nm

| Peak # | RetTime [min] | Type | Width [min] | Area [mAU*s] | Height [mAU] | Area %   |
|--------|---------------|------|-------------|--------------|--------------|----------|
| 1      | 6.824         | BB   | 0.2966      | 849.13531    | 43.13407     | 100.0000 |

# HPLC Chromatogram of 6j

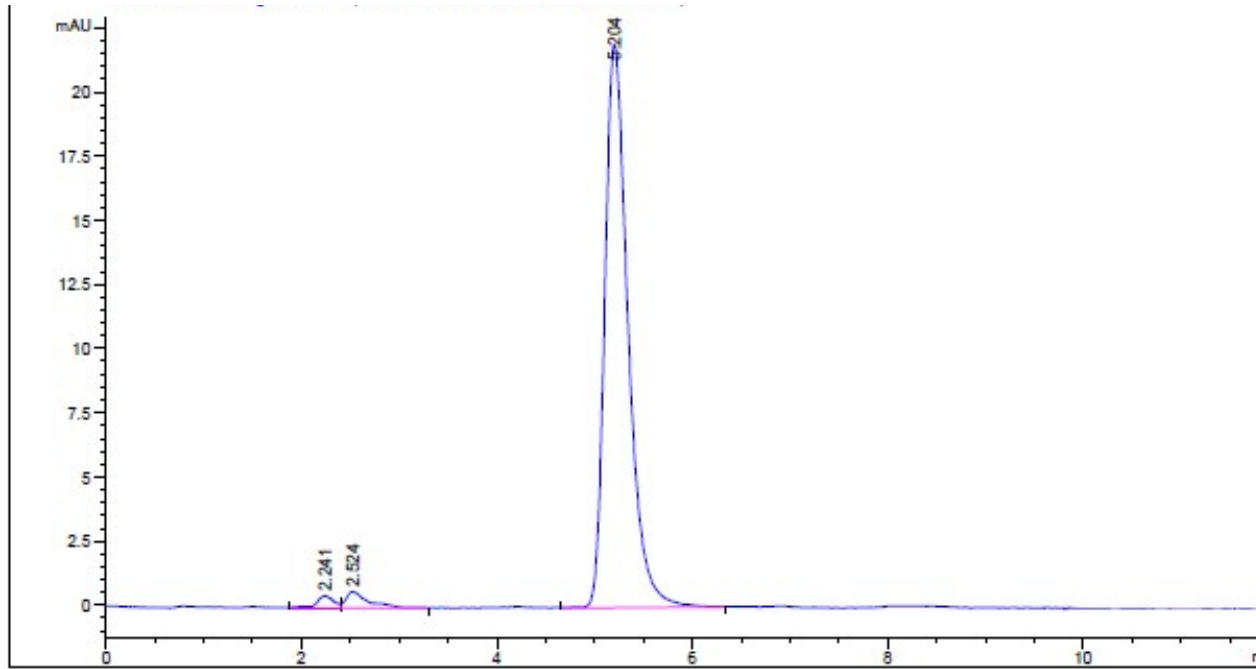

=====  
Area Percent Report  
=====

Sorted By : Signal  
Multiplier : 1.0000  
Dilution : 1.0000  
Use Multiplier & Dilution Factor with ISTDs

Signal 1: VWD1 A, Wavelength=363 nm

| Peak # | RetTime [min] | Type | Width [min] | Area [mAU*s] | Height [mAU] | Area %  |
|--------|---------------|------|-------------|--------------|--------------|---------|
| 1      | 2.241         | BV   | 0.1830      | 5.59402      | 4.68493e-1   | 1.4786  |
| 2      | 2.524         | VB   | 0.2240      | 10.23359     | 6.31506e-1   | 2.7049  |
| 3      | 5.204         | BB   | 0.2540      | 362.50720    | 21.93035     | 95.8165 |

### Mass Spectrum of 5a

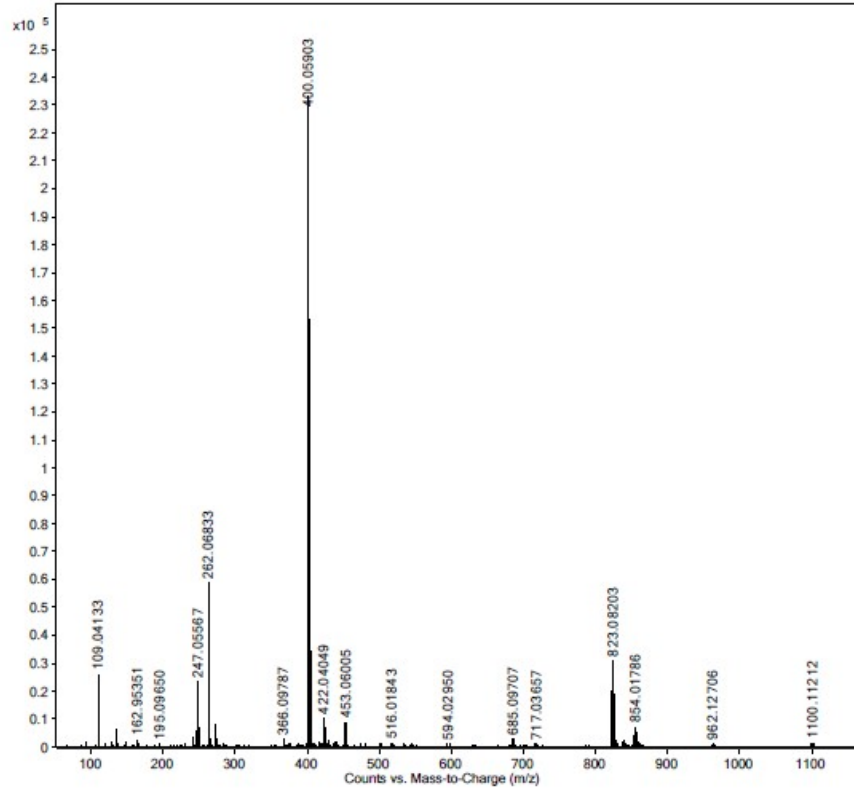

### Mass Spectrum of 5b

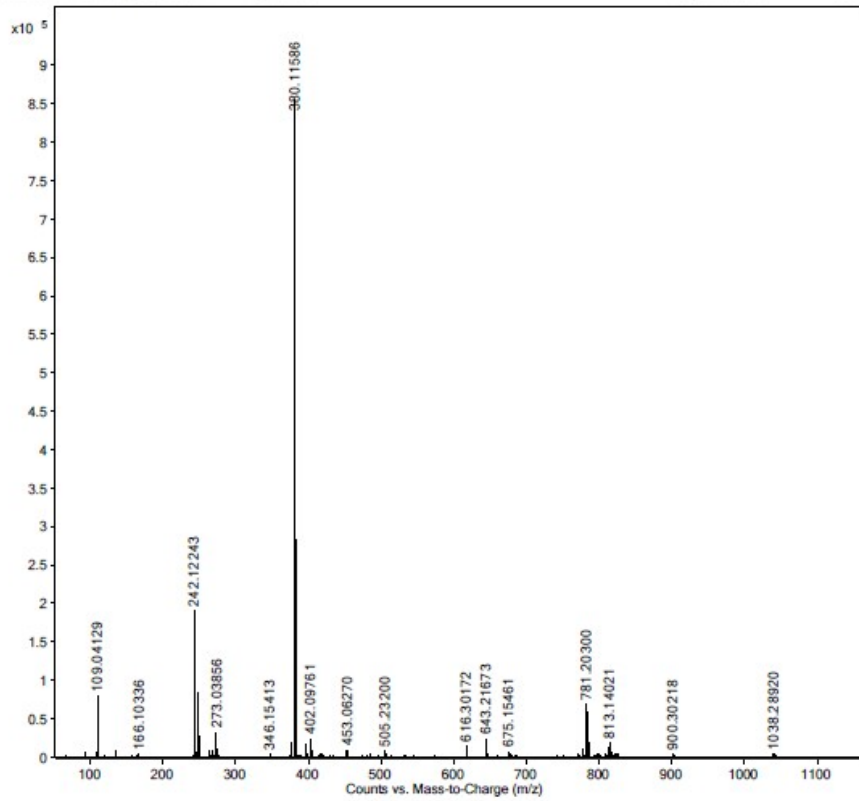

### Mass Spectrum of 5c

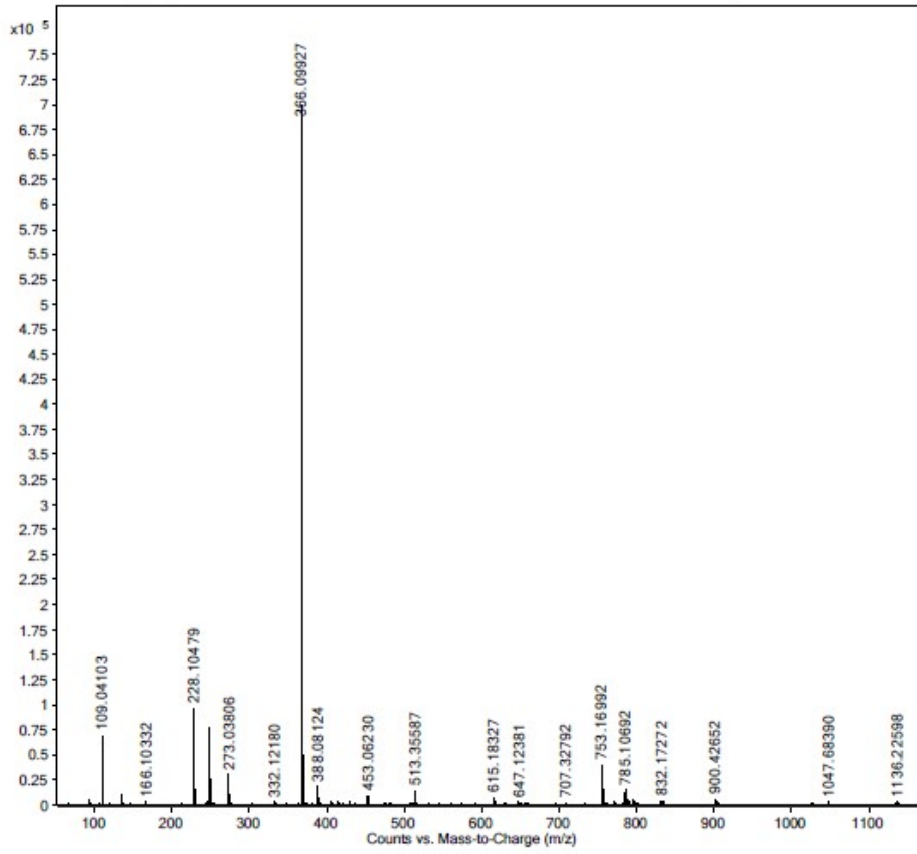

### Mass Spectrum of 5d

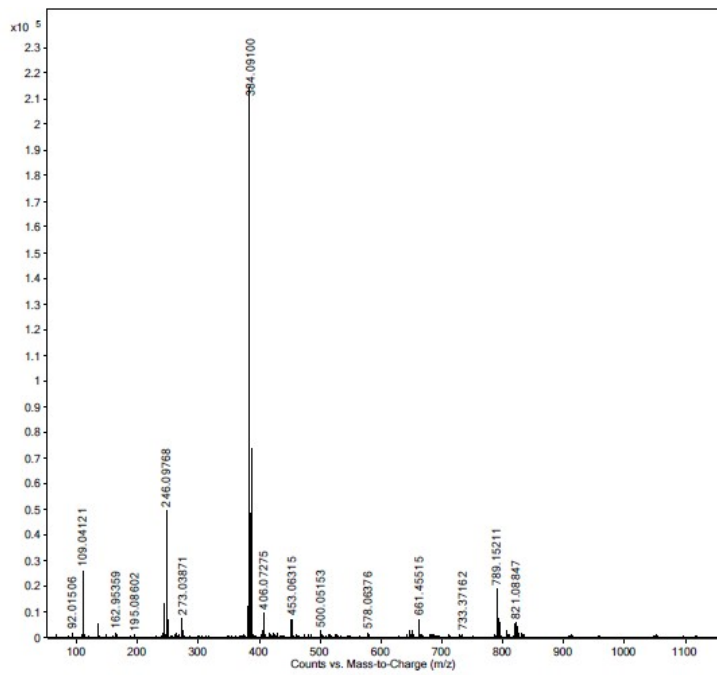

## Mass Spectrum of 5e

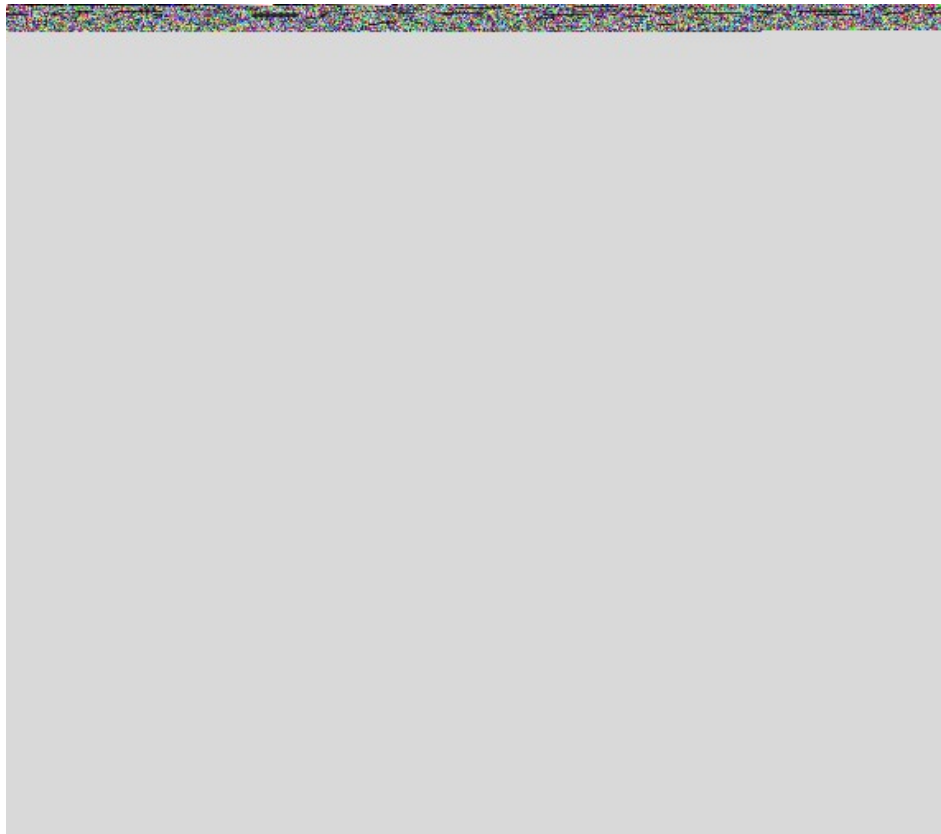

## Mass Spectrum of 5f

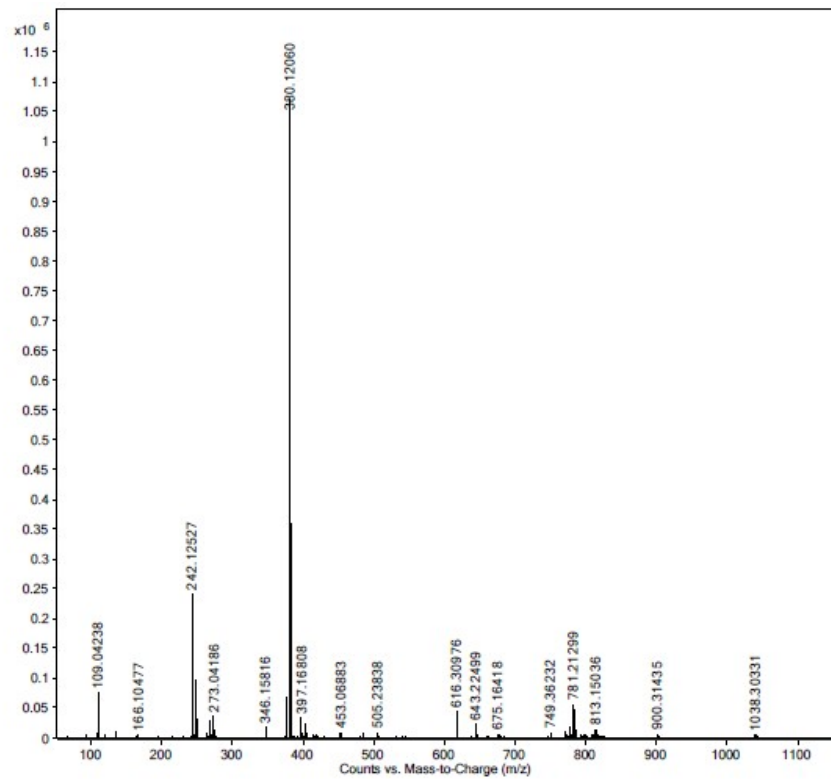

### Mass Spectrum of 5g

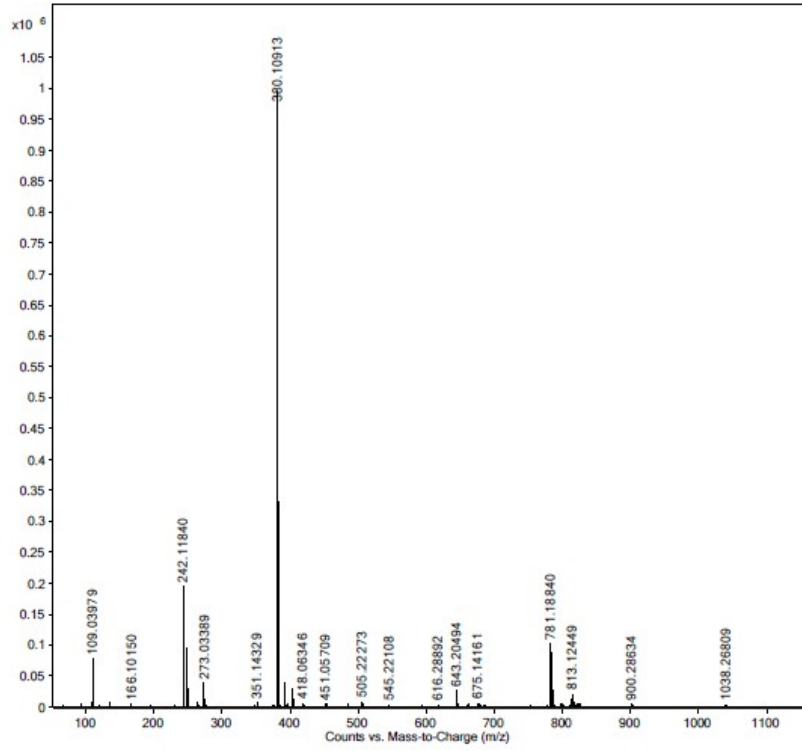

### Mass Spectrum of 5h

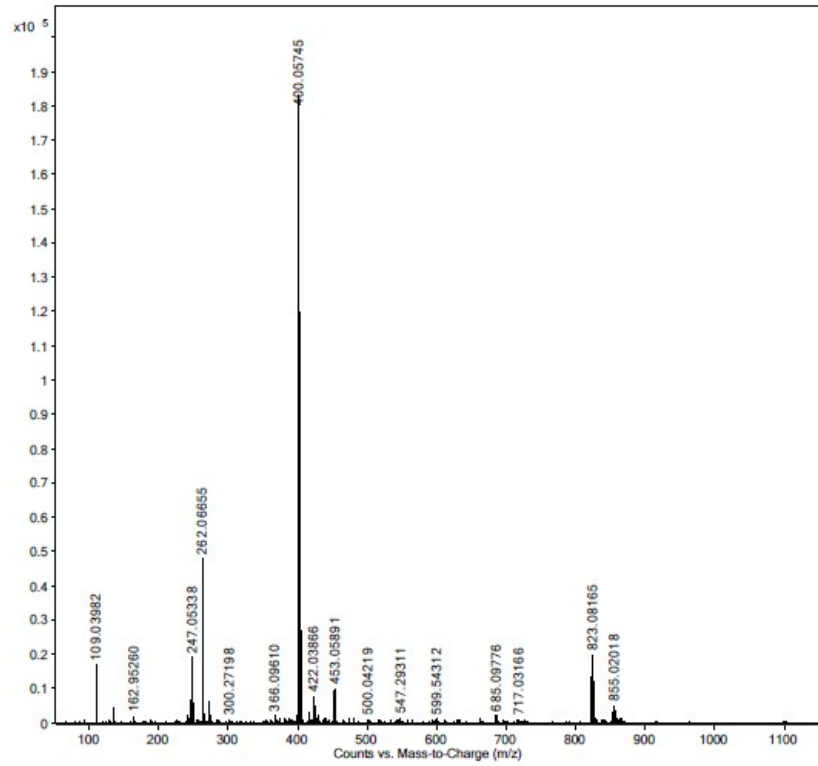



### Mass Spectrum of 5i

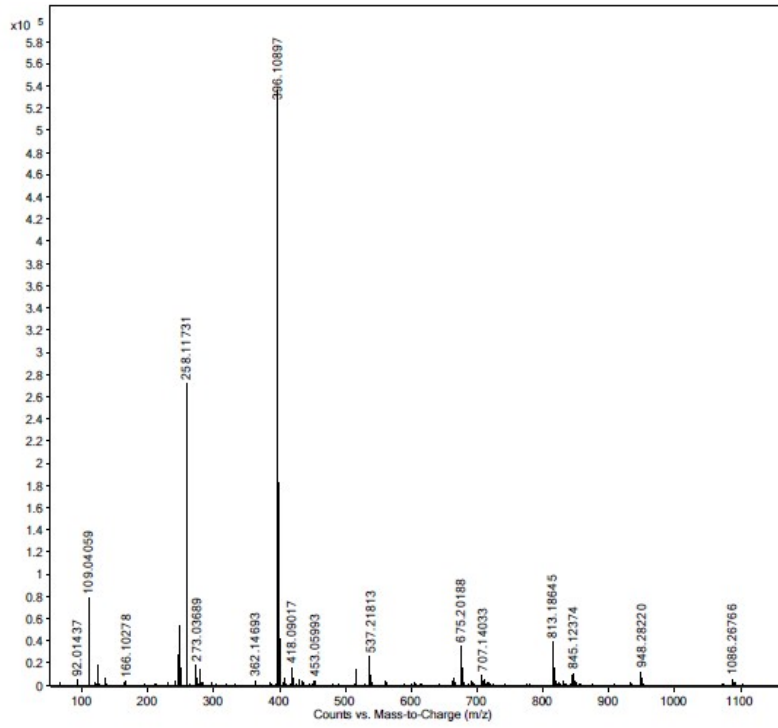

### Mass Spectrum of 5k

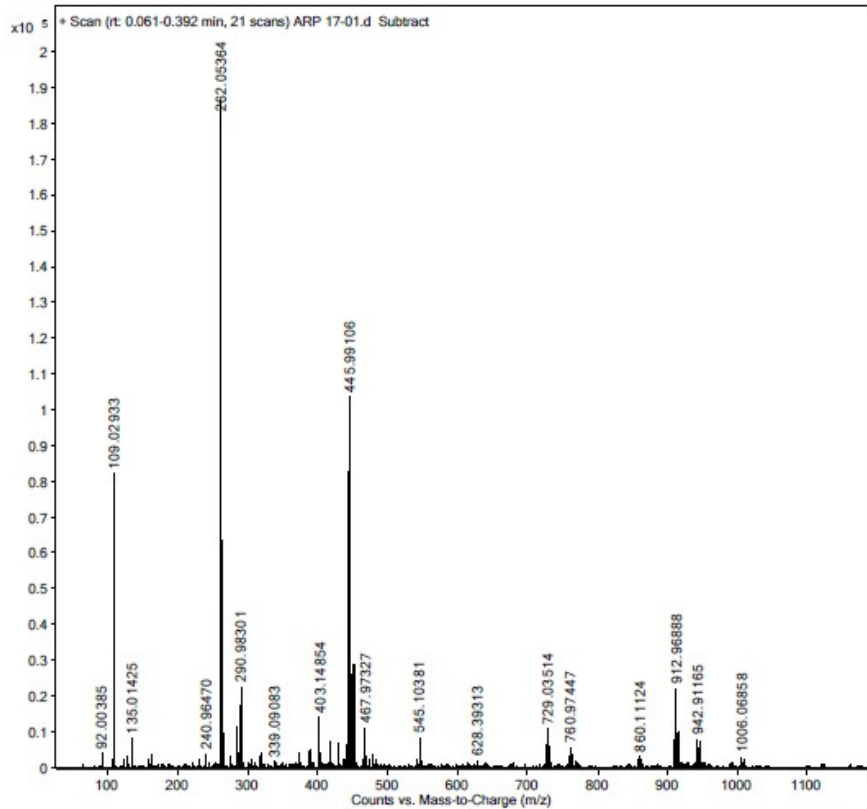

## Mass Spectrum of 5l

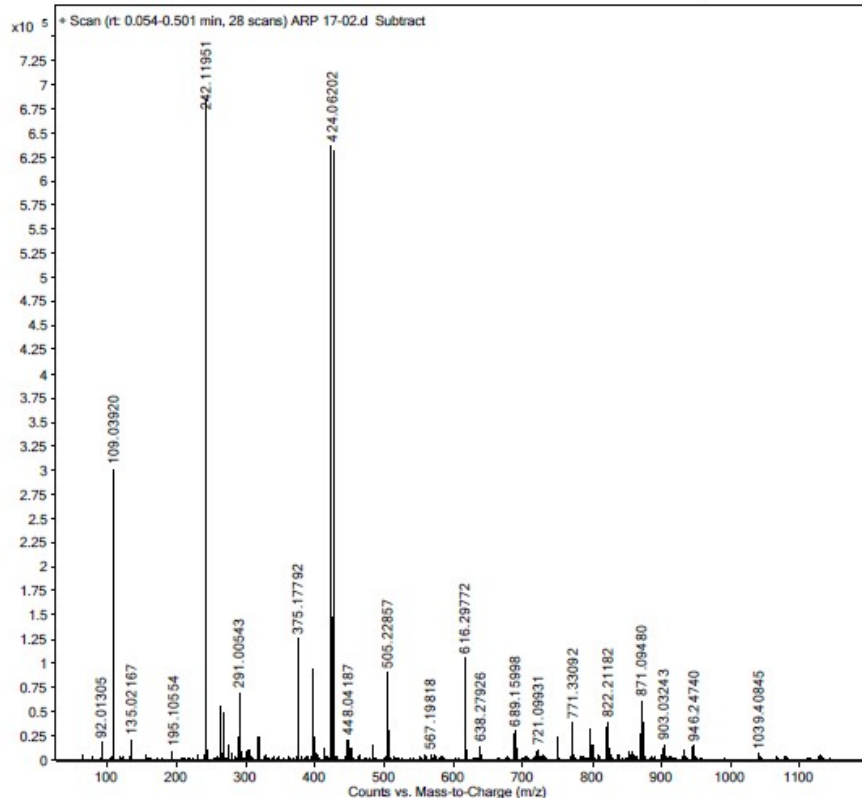

## Mass Spectrum of 5m

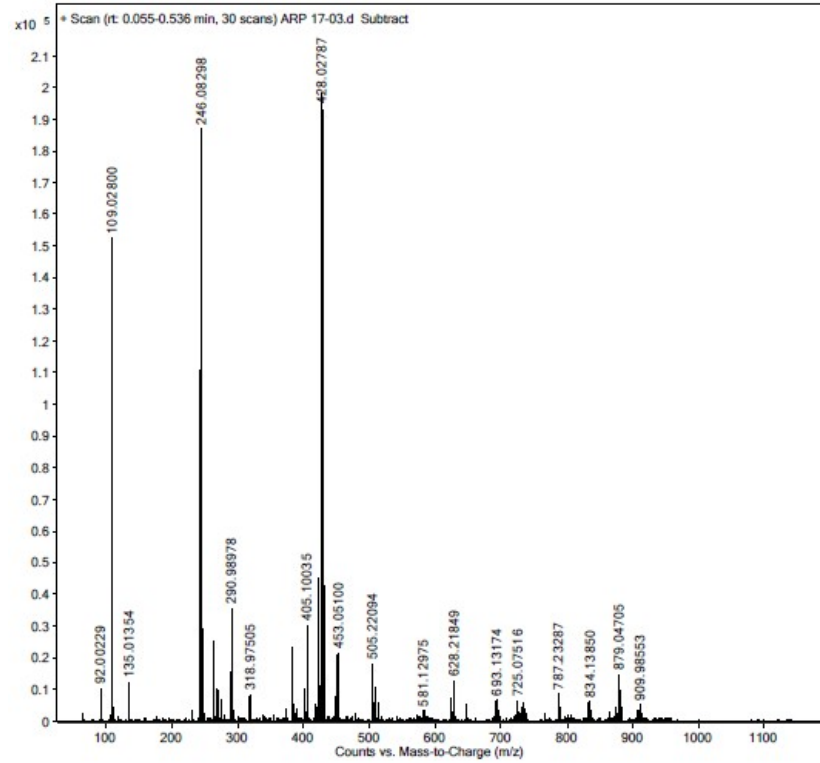

## Mass Spectrum of 5n

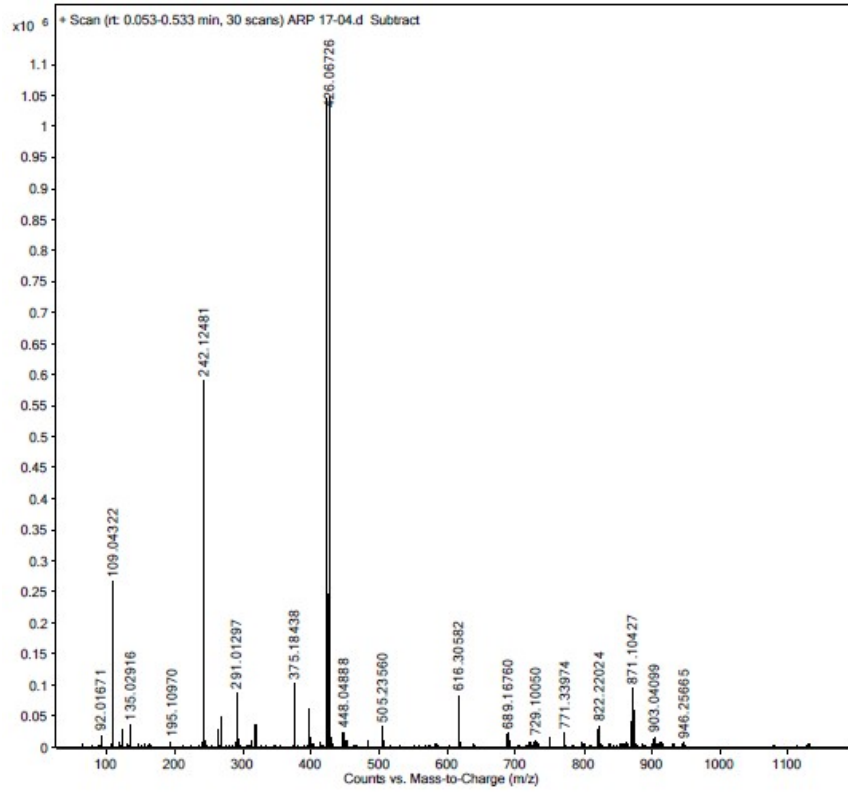

## Mass Spectrum of 5o

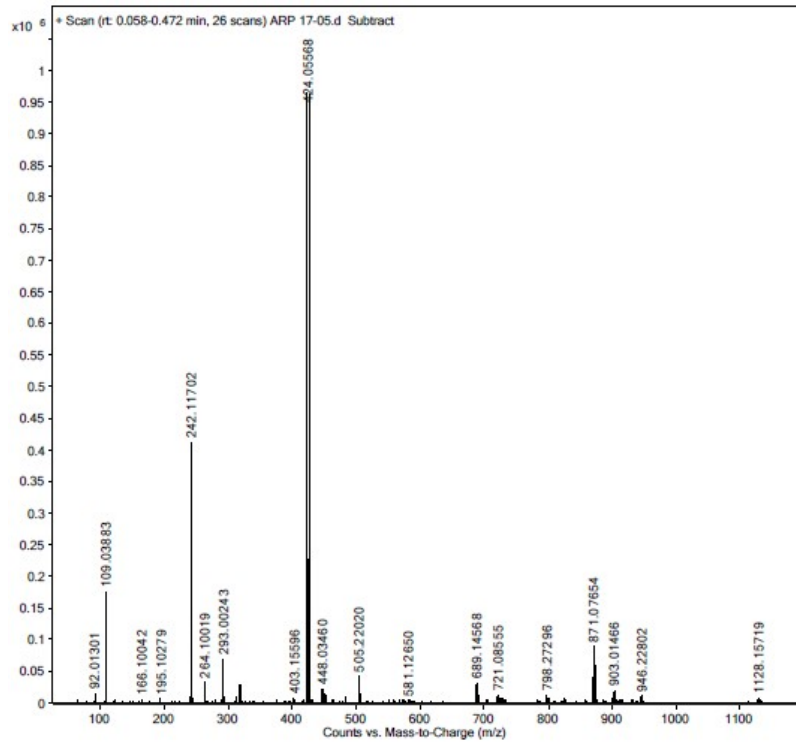

## Mass Spectrum of 5p

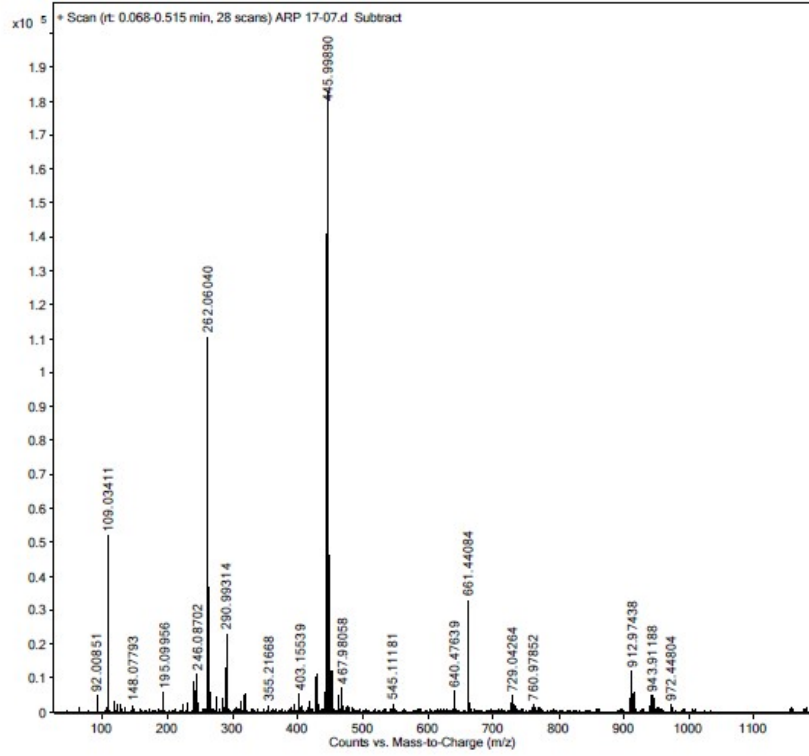

## Mass Spectrum of 5r

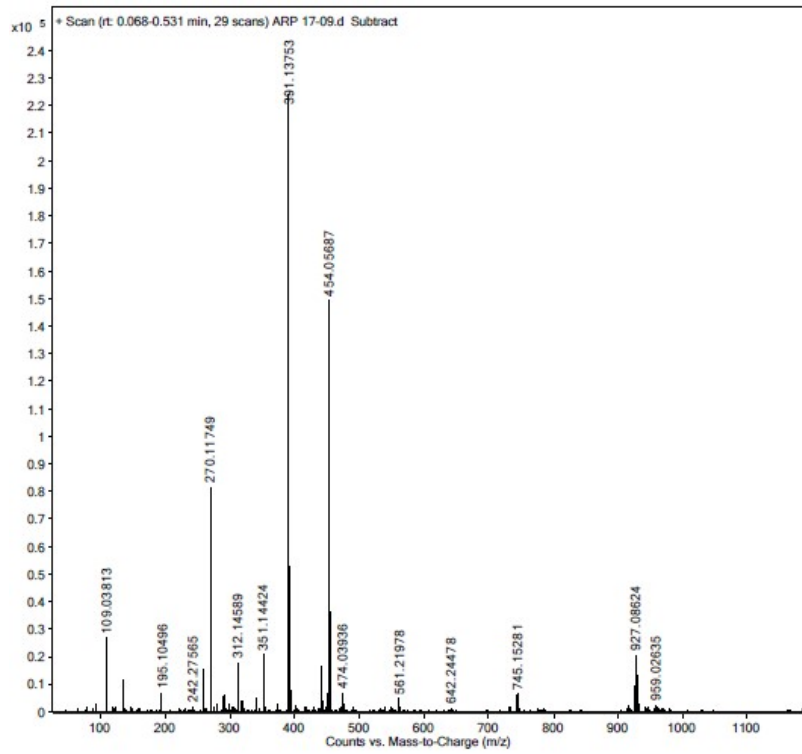

## Mass Spectrum of 5s

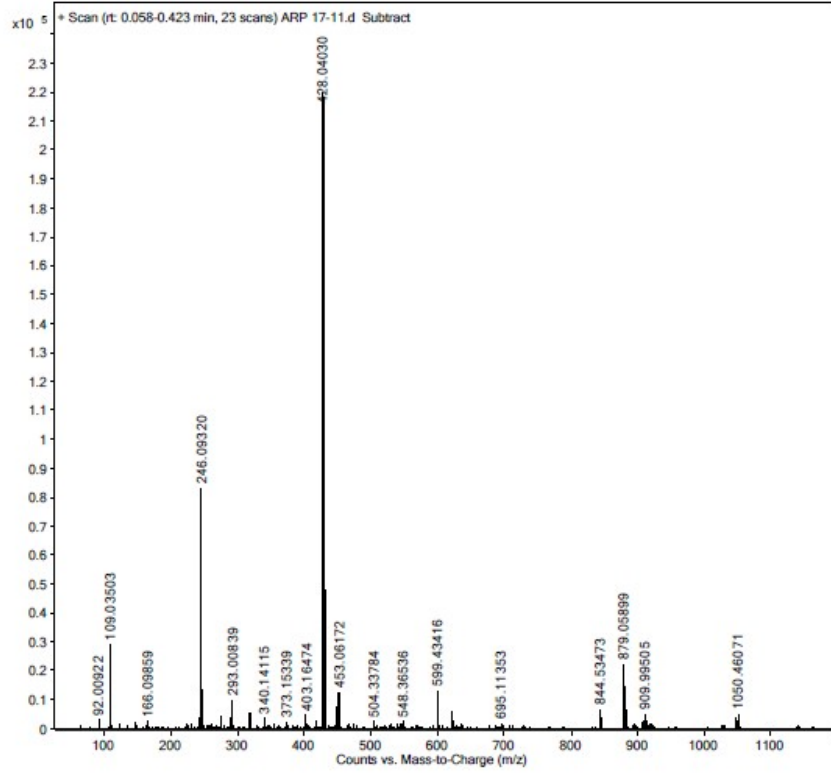

## Mass Spectrum of 5t

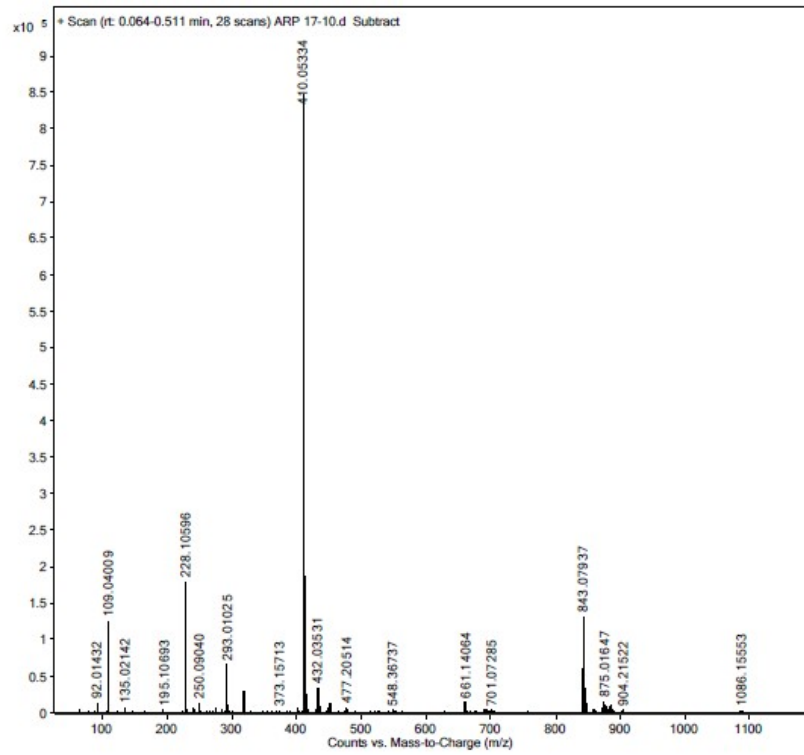

### Mass Spectrum of 6a

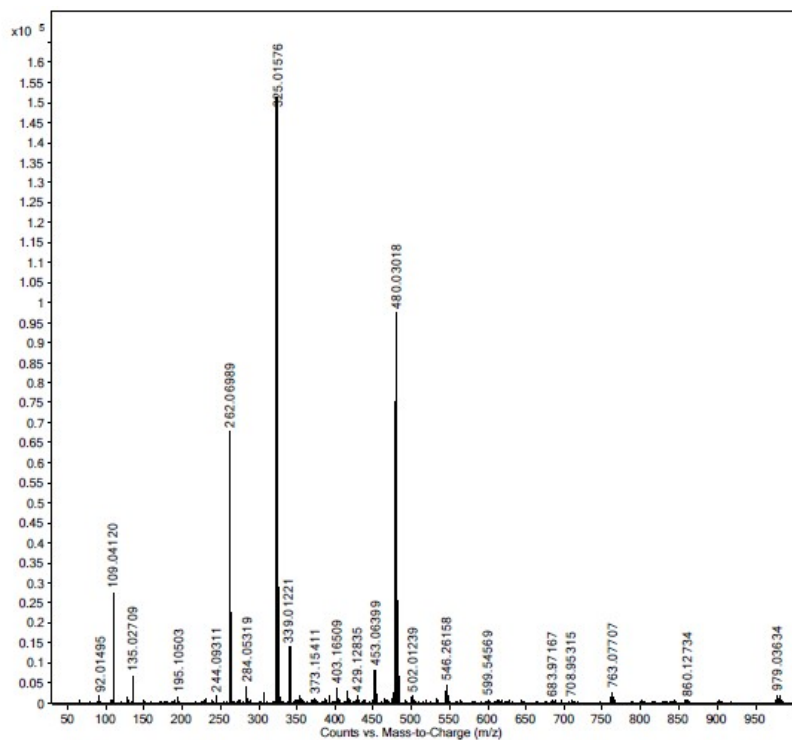

### Mass Spectrum of 6b

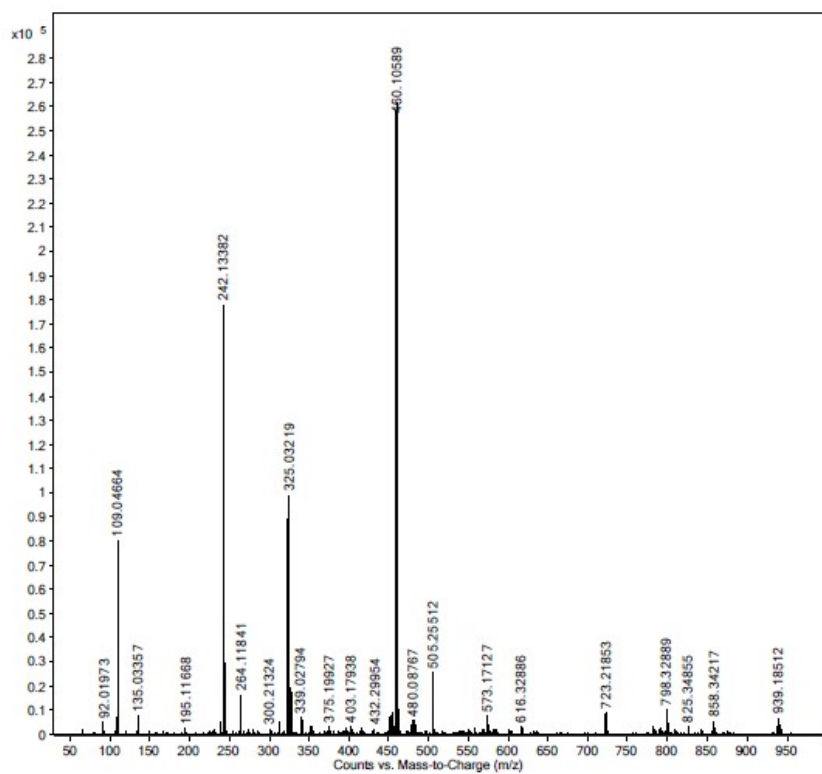

### Mass Spectrum of 6c

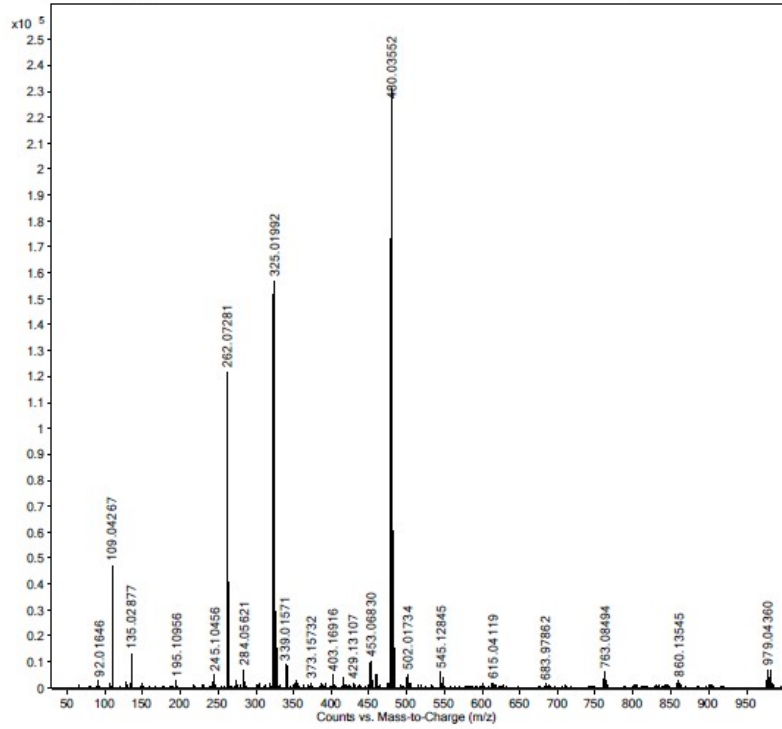

### Mass Spectrum of 6d

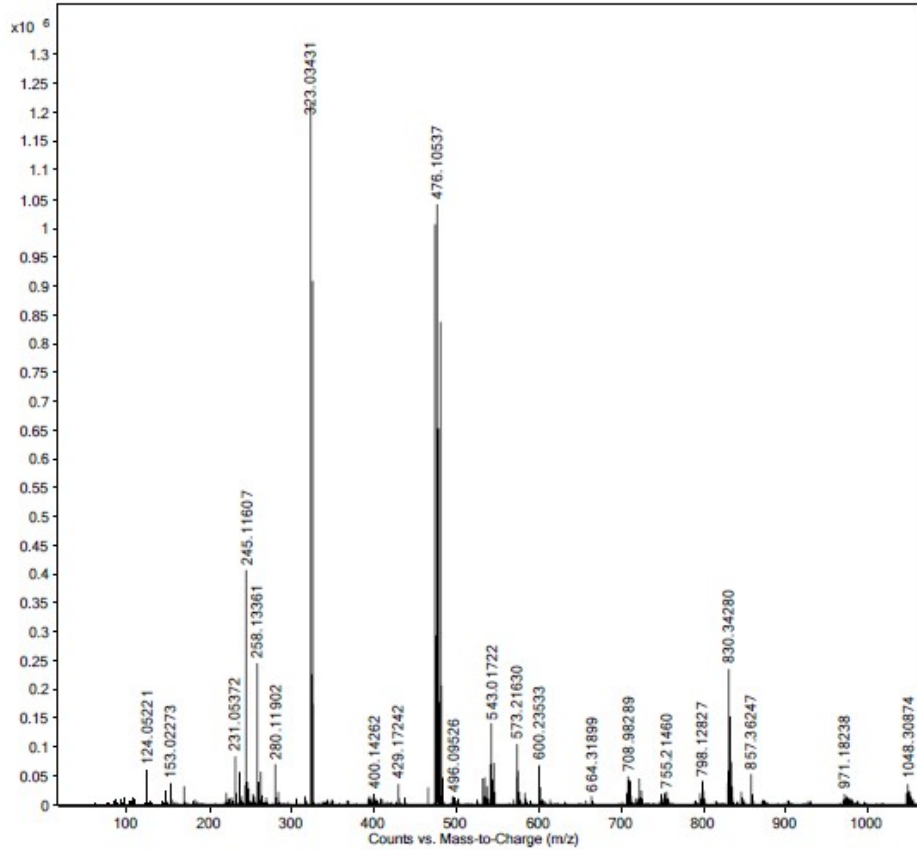

### Mass Spectrum of 6e

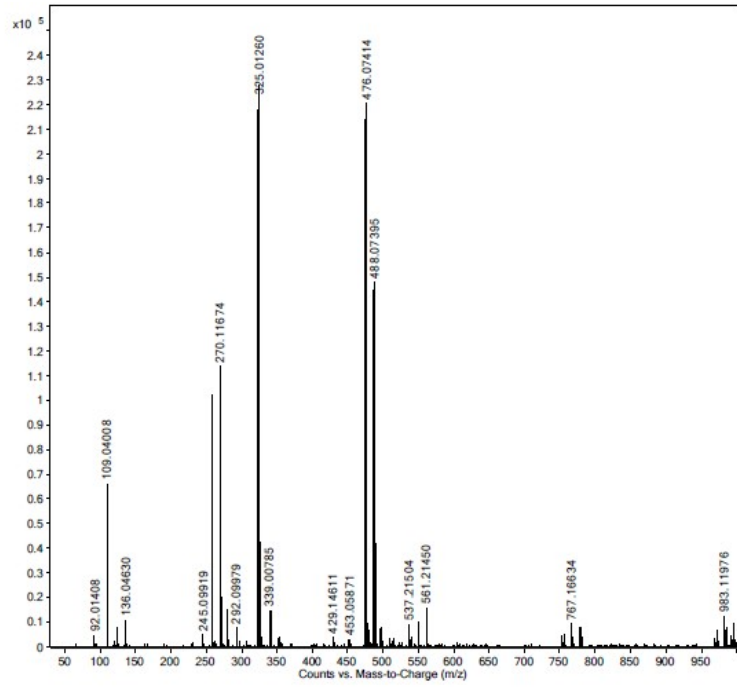

### Mass Spectrum of 6f

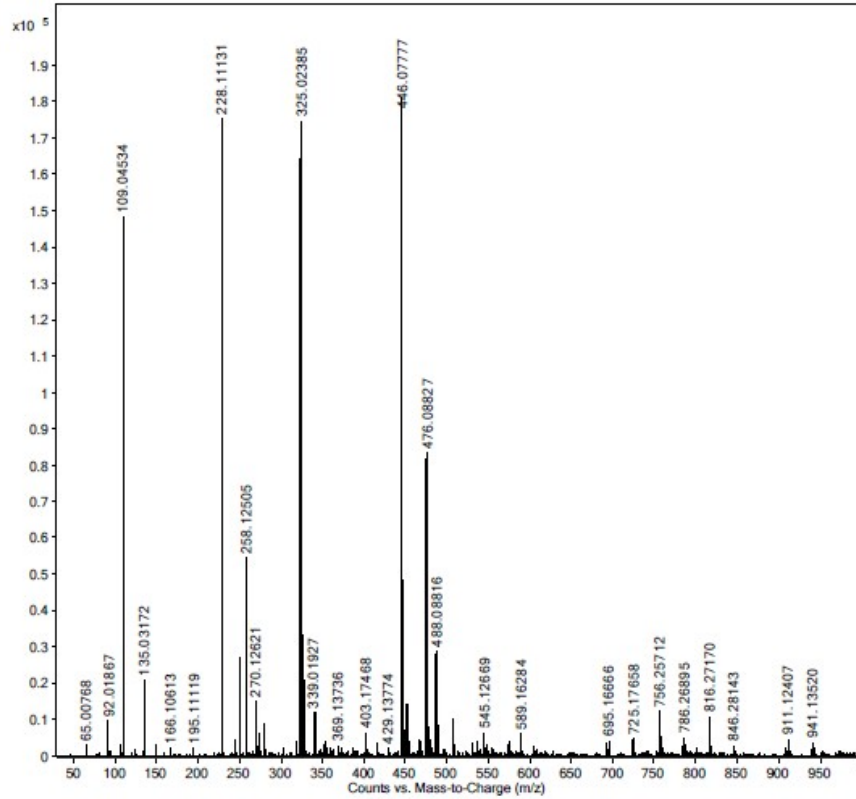



### Mass Spectrum of 6g

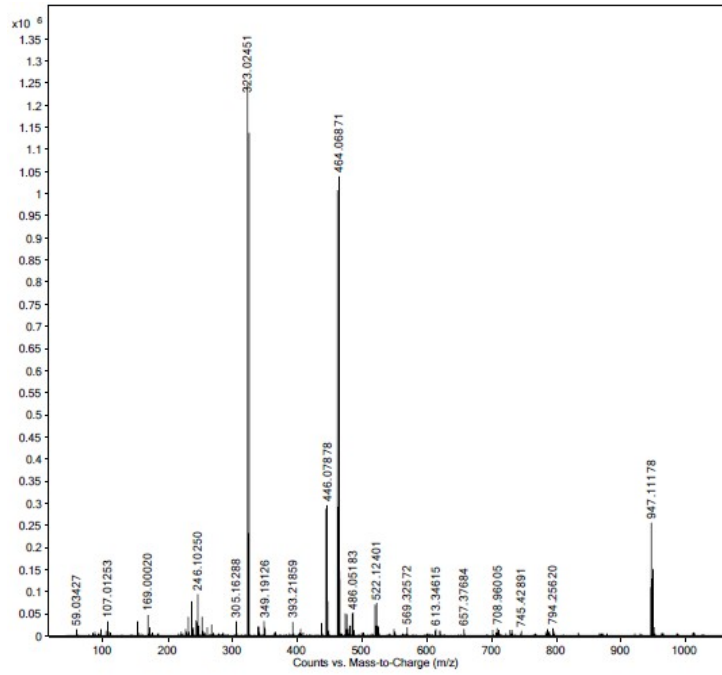

### Mass Spectrum of 6h

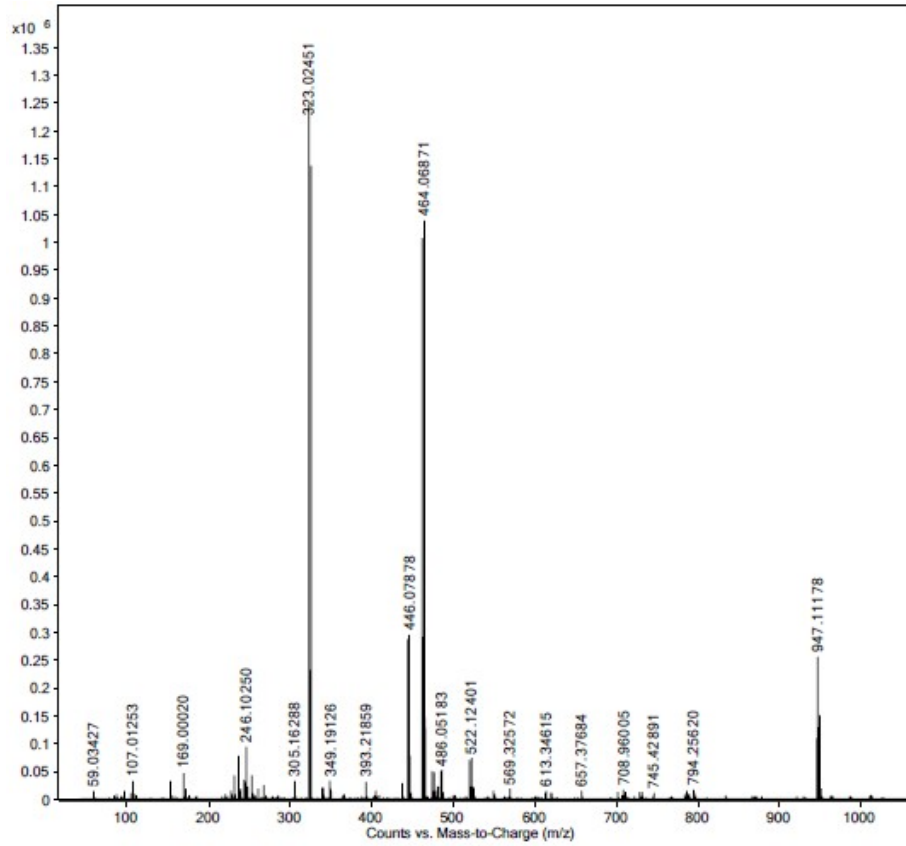

### Mass Spectrum of 6i

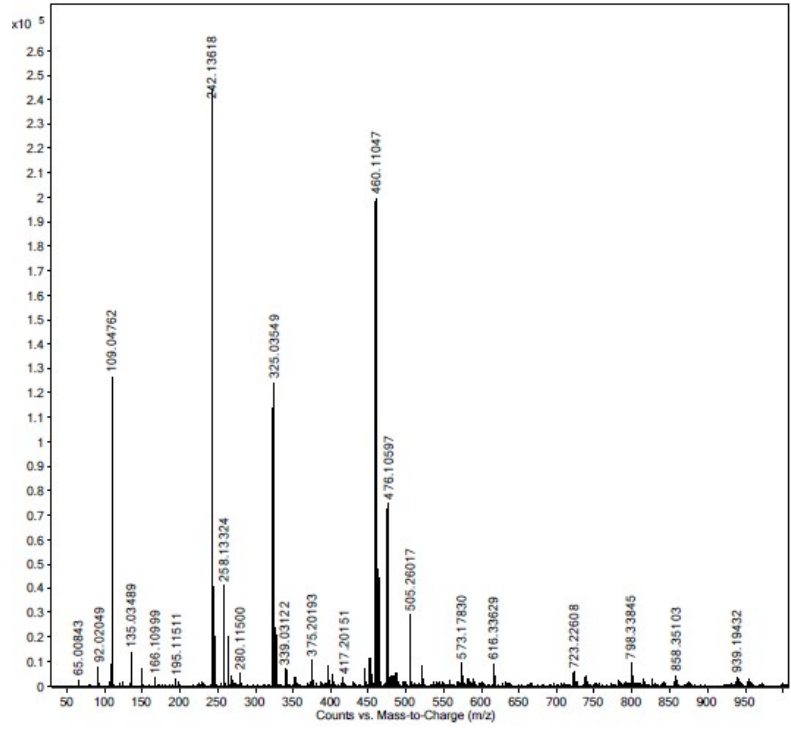

### Mass Spectrum of 6j

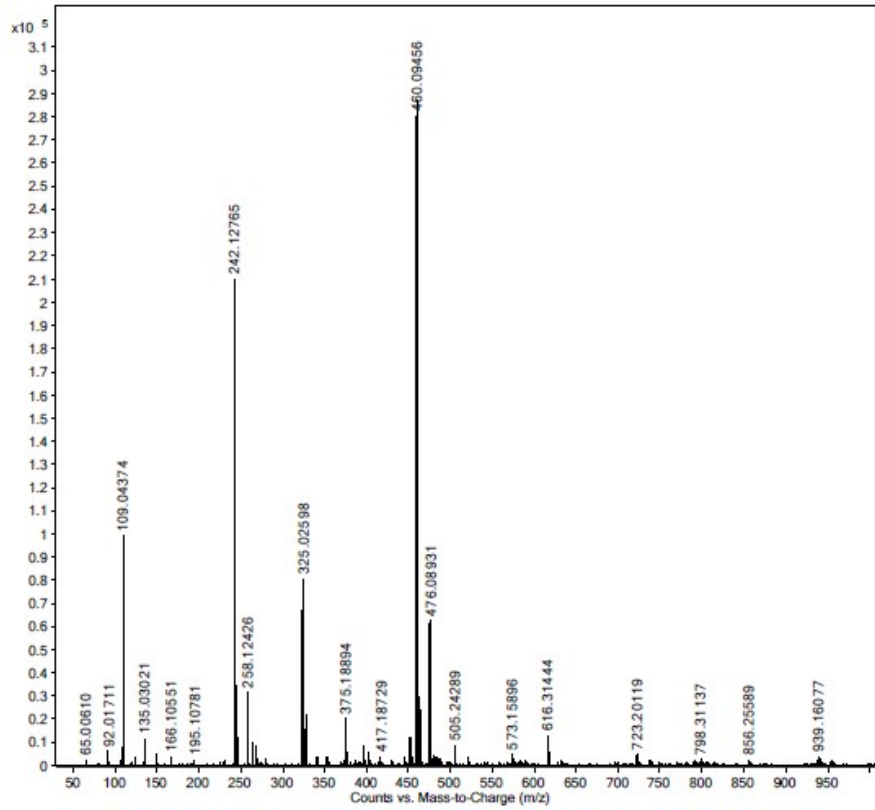

Supplement: d4ra05767h1.pdf [file d4ra05767h1.pdf]
